# Supplementary material for: Comprehensive in silico Characterization of Universal Stress Proteins in Rice (Oryza sativa L.) With Insight Into Their Stress-Specific Transcriptional Modulation
Source: Front Plant Sci. 2021 Jul 28;12:712607. doi: 10.3389/fpls.2021.712607 (PMC8355530; doi:10.3389/fpls.2021.712607)
Supplement: Supplementary file 3 [file Table_1.XLSX]

## Sheet: Genevestigator data export
(linear scale)		Ensembl Gene	OS01G0170600	OS01G0170600	OS01G0170600	OS01G0170600	OS01G0170600	OS01G0170600	OS01G0170600	OS01G0303800	OS01G0303800	OS01G0303800	OS01G0303800	OS01G0303800	OS01G0303800	OS01G0303800	OS01G0511100	OS01G0511100	OS01G0511100	OS01G0511100	OS01G0511100	OS01G0511100	OS01G0511100	OS01G0581400	OS01G0581400	OS01G0581400	OS01G0581400	OS01G0581400	OS01G0581400	OS01G0581400	OS01G0783500	OS01G0783500	OS01G0783500	OS01G0783500	OS01G0783500	OS01G0783500	OS01G0783500	OS01G0849600	OS01G0849600	OS01G0849600	OS01G0849600	OS01G0849600	OS01G0849600	OS01G0849600	OS01G0875300	OS01G0875300	OS01G0875300	OS01G0875300	OS01G0875300
		MSU Locus	LOC_Os01g07590	LOC_Os01g07590	LOC_Os01g07590	LOC_Os01g07590	LOC_Os01g07590	LOC_Os01g07590	LOC_Os01g07590	LOC_Os01g19820	LOC_Os01g19820	LOC_Os01g19820	LOC_Os01g19820	LOC_Os01g19820	LOC_Os01g19820	LOC_Os01g19820	LOC_Os01g32780	LOC_Os01g32780	LOC_Os01g32780	LOC_Os01g32780	LOC_Os01g32780	LOC_Os01g32780	LOC_Os01g32780	LOC_Os01g39970	LOC_Os01g39970	LOC_Os01g39970	LOC_Os01g39970	LOC_Os01g39970	LOC_Os01g39970	LOC_Os01g39970	LOC_Os01g57450	LOC_Os01g57450	LOC_Os01g57450	LOC_Os01g57450	LOC_Os01g57450	LOC_Os01g57450	LOC_Os01g57450	LOC_Os01g63010	LOC_Os01g63010	LOC_Os01g63010	LOC_Os01g63010	LOC_Os01g63010	LOC_Os01g63010	LOC_Os01g63010	LOC_Os01g65440	LOC_Os01g65440	LOC_Os01g65440	LOC_Os01g65440	LOC_Os01g65440
		MSU Transcript	LOC_Os01g07590.1	LOC_Os01g07590.1	LOC_Os01g07590.1	LOC_Os01g07590.1	LOC_Os01g07590.1	LOC_Os01g07590.1	LOC_Os01g07590.1	LOC_Os01g19820.1,LOC_Os01g19820.2,LOC_Os01g19820.3,LOC_Os01g19820.4	LOC_Os01g19820.1,LOC_Os01g19820.2,LOC_Os01g19820.3,LOC_Os01g19820.4	LOC_Os01g19820.1,LOC_Os01g19820.2,LOC_Os01g19820.3,LOC_Os01g19820.4	LOC_Os01g19820.1,LOC_Os01g19820.2,LOC_Os01g19820.3,LOC_Os01g19820.4	LOC_Os01g19820.1,LOC_Os01g19820.2,LOC_Os01g19820.3,LOC_Os01g19820.4	LOC_Os01g19820.1,LOC_Os01g19820.2,LOC_Os01g19820.3,LOC_Os01g19820.4	LOC_Os01g19820.1,LOC_Os01g19820.2,LOC_Os01g19820.3,LOC_Os01g19820.4	LOC_Os01g32780.1	LOC_Os01g32780.1	LOC_Os01g32780.1	LOC_Os01g32780.1	LOC_Os01g32780.1	LOC_Os01g32780.1	LOC_Os01g32780.1	LOC_Os01g39970.1	LOC_Os01g39970.1	LOC_Os01g39970.1	LOC_Os01g39970.1	LOC_Os01g39970.1	LOC_Os01g39970.1	LOC_Os01g39970.1	LOC_Os01g57450.1	LOC_Os01g57450.1	LOC_Os01g57450.1	LOC_Os01g57450.1	LOC_Os01g57450.1	LOC_Os01g57450.1	LOC_Os01g57450.1	LOC_Os01g63010.1	LOC_Os01g63010.1	LOC_Os01g63010.1	LOC_Os01g63010.1	LOC_Os01g63010.1	LOC_Os01g63010.1	LOC_Os01g63010.1	LOC_Os01g65440.1	LOC_Os01g65440.1	LOC_Os01g65440.1	LOC_Os01g65440.1	LOC_Os01g65440.1
		Gene	LOC_Os01g07590	LOC_Os01g07590	LOC_Os01g07590	LOC_Os01g07590	LOC_Os01g07590	LOC_Os01g07590	LOC_Os01g07590	LOC_Os01g19820	LOC_Os01g19820	LOC_Os01g19820	LOC_Os01g19820	LOC_Os01g19820	LOC_Os01g19820	LOC_Os01g19820	LOC_Os01g32780	LOC_Os01g32780	LOC_Os01g32780	LOC_Os01g32780	LOC_Os01g32780	LOC_Os01g32780	LOC_Os01g32780	LOC_Os01g39970	LOC_Os01g39970	LOC_Os01g39970	LOC_Os01g39970	LOC_Os01g39970	LOC_Os01g39970	LOC_Os01g39970	LOC_Os01g57450	LOC_Os01g57450	LOC_Os01g57450	LOC_Os01g57450	LOC_Os01g57450	LOC_Os01g57450	LOC_Os01g57450	LOC_Os01g63010	LOC_Os01g63010	LOC_Os01g63010	LOC_Os01g63010	LOC_Os01g63010	LOC_Os01g63010	LOC_Os01g63010	LOC_Os01g65440	LOC_Os01g65440	LOC_Os01g65440	LOC_Os01g65440	LOC_Os01g65440
		Measure	LOC_Os01g07590	LOC_Os01g07590	LOC_Os01g07590	LOC_Os01g07590	LOC_Os01g07590	LOC_Os01g07590	LOC_Os01g07590	LOC_Os01g19820	LOC_Os01g19820	LOC_Os01g19820	LOC_Os01g19820	LOC_Os01g19820	LOC_Os01g19820	LOC_Os01g19820	LOC_Os01g32780	LOC_Os01g32780	LOC_Os01g32780	LOC_Os01g32780	LOC_Os01g32780	LOC_Os01g32780	LOC_Os01g32780	LOC_Os01g39970	LOC_Os01g39970	LOC_Os01g39970	LOC_Os01g39970	LOC_Os01g39970	LOC_Os01g39970	LOC_Os01g39970	LOC_Os01g57450	LOC_Os01g57450	LOC_Os01g57450	LOC_Os01g57450	LOC_Os01g57450	LOC_Os01g57450	LOC_Os01g57450	LOC_Os01g63010	LOC_Os01g63010	LOC_Os01g63010	LOC_Os01g63010	LOC_Os01g63010	LOC_Os01g63010	LOC_Os01g63010	LOC_Os01g65440	LOC_Os01g65440	LOC_Os01g65440	LOC_Os01g65440	LOC_Os01g65440
		Expression Potential	318.918	318.918	318.918	318.918	318.918	318.918	318.918	259.596	259.596	259.596	259.596	259.596	259.596	259.596	728.226	728.226	728.226	728.226	728.226	728.226	728.226	1552.63	1552.63	1552.63	1552.63	1552.63	1552.63	1552.63	161.226	161.226	161.226	161.226	161.226	161.226	161.226	50.4336	50.4336	50.4336	50.4336	50.4336	50.4336	50.4336	227.483	227.483	227.483	227.483	227.483
Path to root	Anatomy	# samples	Mean value	Standard Deviation	Standard Error	Conf. Int. (95%) Half-width	ANOVA	Levene's Test	Ratio of Expression Potential	Mean value	Standard Deviation	Standard Error	Conf. Int. (95%) Half-width	ANOVA	Levene's Test	Ratio of Expression Potential	Mean value	Standard Deviation	Standard Error	Conf. Int. (95%) Half-width	ANOVA	Levene's Test	Ratio of Expression Potential	Mean value	Standard Deviation	Standard Error	Conf. Int. (95%) Half-width	ANOVA	Levene's Test	Ratio of Expression Potential	Mean value	Standard Deviation	Standard Error	Conf. Int. (95%) Half-width	ANOVA	Levene's Test	Ratio of Expression Potential	Mean value	Standard Deviation	Standard Error	Conf. Int. (95%) Half-width	ANOVA	Levene's Test	Ratio of Expression Potential	Mean value	Standard Deviation	Standard Error	Conf. Int. (95%) Half-width	ANOVA
callus	callus	2	19.3829	0.416349	0.294403	3.74074	NaN	NaN	0.0578979	66.9618	13.9817	9.88654	125.62	NaN	NaN	0.256957	39.7811	1.44808	1.02395	13.0105	NaN	NaN	0.0506393	0.315123	0.176832	0.125039	1.58877	NaN	NaN	0.000202831	51.1906	6.57609	4.65	59.0838	NaN	NaN	0.309114	11.1145	0.113765	0.0804439	1.02214	NaN	NaN	0.215166	39.8161	2.04935	1.44911	18.4127	NaN
cell culture / primary cell	cell culture / primary cell	12	16.5061	4.39158	1.26774	2.79027	0.729	0.551	0.04888	22.9522	23.3675	6.74561	14.847	0.0378	0.631	0.088076	4.65767	2.6008	0.750786	1.65246	0.193	0.1	0.00227458	4.51296	4.69622	1.35568	2.98383	0.448	0.0615	0.00290479	4.82836	1.95853	0.565379	1.24439	0.575	0.263	0.0206365	0.263024	0.253969	0.0733144	0.161364	0.902	0.804	0.00393536	29.2086	16.5265	4.7708	10.5004	3.87e-06
panicle cell > cell culture / primary cell	panicle cell	3	17.3224	3.27487	1.89075	8.13526	NaN	NaN	0.0514389	46.3348	17.9216	10.347	44.5198	NaN	NaN	0.177803	6.40076	0.337623	0.194927	0.838704	NaN	NaN	0.0046748	2.62542	0.26529	0.153165	0.659019	NaN	NaN	0.00168986	5.4141	0.637963	0.368328	1.58479	NaN	NaN	0.0242811	0.279816	0.211892	0.122336	0.52637	NaN	NaN	0.00426222	55.0864	7.09977	4.09905	17.6368	NaN
spikelet cell > panicle cell > cell culture / primary cell	spikelet cell	3	17.3224	3.27487	1.89075	8.13526	NaN	NaN	0.0514389	46.3348	17.9216	10.347	44.5198	NaN	NaN	0.177803	6.40076	0.337623	0.194927	0.838704	NaN	NaN	0.0046748	2.62542	0.26529	0.153165	0.659019	NaN	NaN	0.00168986	5.4141	0.637963	0.368328	1.58479	NaN	NaN	0.0242811	0.279816	0.211892	0.122336	0.52637	NaN	NaN	0.00426222	55.0864	7.09977	4.09905	17.6368	NaN
floret cell > spikelet cell > panicle cell > cell culture / primary cell	floret cell	3	17.3224	3.27487	1.89075	8.13526	NaN	NaN	0.0514389	46.3348	17.9216	10.347	44.5198	NaN	NaN	0.177803	6.40076	0.337623	0.194927	0.838704	NaN	NaN	0.0046748	2.62542	0.26529	0.153165	0.659019	NaN	NaN	0.00168986	5.4141	0.637963	0.368328	1.58479	NaN	NaN	0.0242811	0.279816	0.211892	0.122336	0.52637	NaN	NaN	0.00426222	55.0864	7.09977	4.09905	17.6368	NaN
pistil cell > floret cell > spikelet cell > panicle cell > cell culture / primary cell	pistil cell	3	17.3224	3.27487	1.89075	8.13526	NaN	NaN	0.0514389	46.3348	17.9216	10.347	44.5198	NaN	NaN	0.177803	6.40076	0.337623	0.194927	0.838704	NaN	NaN	0.0046748	2.62542	0.26529	0.153165	0.659019	NaN	NaN	0.00168986	5.4141	0.637963	0.368328	1.58479	NaN	NaN	0.0242811	0.279816	0.211892	0.122336	0.52637	NaN	NaN	0.00426222	55.0864	7.09977	4.09905	17.6368	NaN
ovary cell > pistil cell > floret cell > spikelet cell > panicle cell > cell culture / primary cell	ovary cell	3	17.3224	3.27487	1.89075	8.13526	NaN	NaN	0.0514389	46.3348	17.9216	10.347	44.5198	NaN	NaN	0.177803	6.40076	0.337623	0.194927	0.838704	NaN	NaN	0.0046748	2.62542	0.26529	0.153165	0.659019	NaN	NaN	0.00168986	5.4141	0.637963	0.368328	1.58479	NaN	NaN	0.0242811	0.279816	0.211892	0.122336	0.52637	NaN	NaN	0.00426222	55.0864	7.09977	4.09905	17.6368	NaN
ovule cell > ovary cell > pistil cell > floret cell > spikelet cell > panicle cell > cell culture / primary cell	ovule cell	3	17.3224	3.27487	1.89075	8.13526	NaN	NaN	0.0514389	46.3348	17.9216	10.347	44.5198	NaN	NaN	0.177803	6.40076	0.337623	0.194927	0.838704	NaN	NaN	0.0046748	2.62542	0.26529	0.153165	0.659019	NaN	NaN	0.00168986	5.4141	0.637963	0.368328	1.58479	NaN	NaN	0.0242811	0.279816	0.211892	0.122336	0.52637	NaN	NaN	0.00426222	55.0864	7.09977	4.09905	17.6368	NaN
embryo sac cell > ovule cell > ovary cell > pistil cell > floret cell > spikelet cell > panicle cell > cell culture / primary cell	embryo sac cell	3	17.3224	3.27487	1.89075	8.13526	NaN	NaN	0.0514389	46.3348	17.9216	10.347	44.5198	NaN	NaN	0.177803	6.40076	0.337623	0.194927	0.838704	NaN	NaN	0.0046748	2.62542	0.26529	0.153165	0.659019	NaN	NaN	0.00168986	5.4141	0.637963	0.368328	1.58479	NaN	NaN	0.0242811	0.279816	0.211892	0.122336	0.52637	NaN	NaN	0.00426222	55.0864	7.09977	4.09905	17.6368	NaN
egg cell > embryo sac cell > ovule cell > ovary cell > pistil cell > floret cell > spikelet cell > panicle cell > cell culture / primary cell	egg cell	3	17.3224	3.27487	1.89075	8.13526	NaN	NaN	0.0514389	46.3348	17.9216	10.347	44.5198	NaN	NaN	0.177803	6.40076	0.337623	0.194927	0.838704	NaN	NaN	0.0046748	2.62542	0.26529	0.153165	0.659019	NaN	NaN	0.00168986	5.4141	0.637963	0.368328	1.58479	NaN	NaN	0.0242811	0.279816	0.211892	0.122336	0.52637	NaN	NaN	0.00426222	55.0864	7.09977	4.09905	17.6368	NaN
caryopsis cell > cell culture / primary cell	caryopsis cell	9	16.234	4.84808	1.61603	3.72655	NaN	NaN	0.0480271	15.158	19.9283	6.64275	15.3182	NaN	NaN	0.0581668	4.07665	2.78443	0.928142	2.14029	NaN	NaN	0.00147451	5.14214	5.34097	1.78032	4.10542	NaN	NaN	0.00330976	4.63312	2.23629	0.745429	1.71896	NaN	NaN	0.0194216	0.257427	0.278068	0.0926895	0.213742	NaN	NaN	0.00382641	20.5827	5.30251	1.7675	4.07586	NaN
embryo cell > caryopsis cell > cell culture / primary cell	embryo cell	9	16.234	4.84808	1.61603	3.72655	NaN	NaN	0.0480271	15.158	19.9283	6.64275	15.3182	NaN	NaN	0.0581668	4.07665	2.78443	0.928142	2.14029	NaN	NaN	0.00147451	5.14214	5.34097	1.78032	4.10542	NaN	NaN	0.00330976	4.63312	2.23629	0.745429	1.71896	NaN	NaN	0.0194216	0.257427	0.278068	0.0926895	0.213742	NaN	NaN	0.00382641	20.5827	5.30251	1.7675	4.07586	NaN
zygote > embryo cell > caryopsis cell > cell culture / primary cell	zygote	9	16.234	4.84808	1.61603	3.72655	NaN	NaN	0.0480271	15.158	19.9283	6.64275	15.3182	NaN	NaN	0.0581668	4.07665	2.78443	0.928142	2.14029	NaN	NaN	0.00147451	5.14214	5.34097	1.78032	4.10542	NaN	NaN	0.00330976	4.63312	2.23629	0.745429	1.71896	NaN	NaN	0.0194216	0.257427	0.278068	0.0926895	0.213742	NaN	NaN	0.00382641	20.5827	5.30251	1.7675	4.07586	NaN
seedling	seedling	48	4.09814	2.59568	0.374654	0.753707	0.00127	0.00678	0.00998422	80.7993	79.4197	11.4632	23.061	1.61e-06	2.46e-08	0.310056	22.2334	12.2349	1.76595	3.55263	0.0773	0.00604	0.0264762	0.491306	0.681261	0.0983315	0.197817	0.00655	0.122	0.000316232	28.1817	20.109	2.90249	5.83904	3.11e-05	0.00428	0.165947	4.2157	2.25665	0.325719	0.655262	0.00262	0.349	0.0808766	30.5813	28.3102	4.08623	8.22042	1.28e-12
coleoptile > seedling	coleoptile	23	4.64058	2.46532	0.514056	1.06609	NaN	NaN	0.0116846	135.875	78.1632	16.2982	33.8003	NaN	NaN	0.521401	22.8972	12.5958	2.6264	5.44682	NaN	NaN	0.0273903	0.498247	0.798513	0.166501	0.345302	NaN	NaN	0.000320699	16.3611	11.673	2.434	5.04779	NaN	NaN	0.092396	4.27306	1.7278	0.360271	0.747156	NaN	NaN	0.0819931	17.3957	11.753	2.45067	5.08238	NaN
leaf > seedling	leaf	4	6.94855	1.73481	0.867405	2.76047	NaN	NaN	0.0189195	35.334	28.1418	14.0709	44.78	NaN	NaN	0.135589	27.6142	2.88336	1.44168	4.58808	NaN	NaN	0.0338855	1.48138	0.468639	0.23432	0.745711	NaN	NaN	0.0009535	30.5099	3.30483	1.65241	5.25873	NaN	NaN	0.180433	4.73168	0.866144	0.433072	1.37823	NaN	NaN	0.0909204	50.3761	8.9602	4.4801	14.2577	NaN
root > seedling	root	9	3.74839	2.86694	0.955647	2.20372	NaN	NaN	0.00888785	3.59612	3.0887	1.02957	2.37418	NaN	NaN	0.0137996	13.8641	12.147	4.049	9.33698	NaN	NaN	0.0149517	0.113352	0.107955	0.0359851	0.0829816	NaN	NaN	7.29597e-05	37.9505	25.9717	8.65723	19.9636	NaN	NaN	0.226731	2.35809	3.23736	1.07912	2.48845	NaN	NaN	0.044717	6.01305	6.70627	2.23542	5.15488	NaN
radicle > root > seedling	radicle	9	3.74839	2.86694	0.955647	2.20372	0.000321	0.216	0.00888785	3.59612	3.0887	1.02957	2.37418	0.573	0.377	0.0137996	13.8641	12.147	4.049	9.33698	0.0206	0.00772	0.0149517	0.113352	0.107955	0.0359851	0.0829816	0.71	0.188	7.29597e-05	37.9505	25.9717	8.65723	19.9636	0.104	0.0391	0.226731	2.35809	3.23736	1.07912	2.48845	0.00743	0.0232	0.044717	6.01305	6.70627	2.23542	5.15488	0.664
maturation zone > radicle > root > seedling	maturation zone	3	1.47352	0.361275	0.208582	0.89746	NaN	NaN	0.00175672	1.97024	2.18841	1.26348	5.43632	NaN	NaN	0.00756054	26.8765	12.5404	7.24019	31.1521	NaN	NaN	0.0328698	0.0966777	0.0896385	0.0517528	0.222675	NaN	NaN	6.22271e-05	61.5039	30.7244	17.7387	76.3239	NaN	NaN	0.373286	6.2108	2.84359	1.64175	7.06389	NaN	NaN	0.119712	9.12104	12.3778	7.14634	30.7483	NaN
radicle tip > radicle > root > seedling	radicle tip	3	7.40124	1.37323	0.792836	3.41131	NaN	NaN	0.0203386	3.99398	2.54965	1.47204	6.3337	NaN	NaN	0.0153263	3.38057	0.789615	0.455885	1.96152	NaN	NaN	0.000516013	0.0833483	0.0763894	0.0441034	0.189762	NaN	NaN	5.36475e-05	18.3695	5.28816	3.05312	13.1366	NaN	NaN	0.104893	0.093347	0.0950553	0.0548802	0.236131	NaN	NaN	0.000632494	3.82728	1.28871	0.744037	3.20134	NaN
elongation zone > radicle > root > seedling	elongation zone	3	2.37041	0.485164	0.28011	1.20522	NaN	NaN	0.00456823	4.82414	4.51727	2.60805	11.2216	NaN	NaN	0.018512	11.3351	1.96934	1.137	4.89214	NaN	NaN	0.0114694	0.160031	0.166467	0.0961098	0.413528	NaN	NaN	0.000103004	33.9781	17.1821	9.92011	42.6829	NaN	NaN	0.202013	0.770114	0.293072	0.169205	0.728032	NaN	NaN	0.0138062	5.09083	1.44686	0.835344	3.5942	NaN
inflorescence	inflorescence	117	23.1756	22.1689	2.04952	4.05933	4.88e-15	5.05e-09	0.0697873	35.3421	37.3746	3.45528	6.84362	0.000748	0.0285	0.135621	81.1611	89.937	8.31468	16.4683	0	0	0.107619	243.85	651.365	60.2187	119.271	0.000146	8.09e-13	0.156955	54.6155	35.867	3.3159	6.56756	0.93	2.5e-07	0.330424	17.4587	32.9957	3.05045	6.0418	9.25e-14	2.44e-14	0.33866	42.2589	61.6406	5.69868	11.2869	2.89e-15
panicle > inflorescence	panicle	70	30.9952	25.7332	3.07571	6.13587	0	5.65e-12	0.0942998	27.1765	31.5107	3.76625	7.51345	0.0822	0.00205	0.104286	38.875	23.2777	2.78222	5.55037	1.19e-07	1.63e-06	0.0493916	405.952	804.24	96.1251	191.764	0.00856	0.0222	0.261293	54.4482	37.6591	4.50112	8.97948	0.000136	2.1e-08	0.329383	3.32007	3.71106	0.443557	0.884871	3.86e-05	0.00532	0.0634425	63.883	71.327	8.52521	17.0073	0.000167
spikelet > panicle > inflorescence	spikelet	44	15.2229	8.08368	1.21866	2.45766	0.00916	0.00286	0.0448575	31.5474	38.1213	5.747	11.5899	0.823	0.654	0.121059	29.6806	18.0548	2.72186	5.48915	0.0133	0.00484	0.036731	229.77	848.207	127.872	257.878	0.315	0.00291	0.147893	62.9974	45.1449	6.80584	13.7253	0.000347	3.53e-07	0.382578	2.1306	3.42765	0.516738	1.0421	0.203	0.00064	0.0402888	78.2283	83.8933	12.6474	25.5059	3.37e-13
floret > spikelet > panicle > inflorescence	floret	35	16.2968	8.68416	1.46789	2.98311	2.09e-05	0.684	0.0482238	32.116	41.5677	7.02622	14.279	0.0424	0.0053	0.123241	32.062	19.5495	3.30447	6.71548	0.58	0.859	0.0400101	288.64	944.699	159.683	324.515	0.00613	1.59e-10	0.185785	71.5198	47.0164	7.94722	16.1507	0.00539	0.159	0.435607	2.39907	3.80098	0.642483	1.30568	0.986	0.00476	0.0455148	43.4263	30.6774	5.18543	10.5381	0.0275
stamen > floret > spikelet > panicle > inflorescence	stamen	11	9.27631	5.89722	1.77808	3.9618	NaN	NaN	0.0262165	13.3079	9.66038	2.91271	6.48992	NaN	NaN	0.0510671	30.1722	11.0259	3.32444	7.4073	NaN	NaN	0.0374079	913.351	1551.85	467.901	1042.55	NaN	NaN	0.587883	47.5136	23.4476	7.06973	15.7523	NaN	NaN	0.286234	2.38535	3.71325	1.11959	2.49459	NaN	NaN	0.0452477	30.3597	23.5221	7.09218	15.8023	NaN
anther > stamen > floret > spikelet > panicle > inflorescence	anther	11	9.27631	5.89722	1.77808	3.9618	NaN	NaN	0.0262165	13.3079	9.66038	2.91271	6.48992	NaN	NaN	0.0510671	30.1722	11.0259	3.32444	7.4073	NaN	NaN	0.0374079	913.351	1551.85	467.901	1042.55	NaN	NaN	0.587883	47.5136	23.4476	7.06973	15.7523	NaN	NaN	0.286234	2.38535	3.71325	1.11959	2.49459	NaN	NaN	0.0452477	30.3597	23.5221	7.09218	15.8023	NaN
pistil > floret > spikelet > panicle > inflorescence	pistil	24	19.5145	7.87313	1.6071	3.32453	0.000114	1.26e-05	0.0583104	40.7364	47.6124	9.71885	20.1049	0.0241	0.000387	0.15632	32.9281	22.5747	4.60804	9.53245	1.33e-05	3.44e-06	0.0412027	2.31461	5.34708	1.09147	2.25787	0.273	0.0106	0.00148981	82.5226	51.252	10.4618	21.6418	7.99e-05	2.48e-10	0.504069	2.40537	3.91945	0.800054	1.65504	8.1e-05	1.64e-07	0.0456373	49.4152	32.1178	6.55602	13.5621	0.205
ovary > pistil > floret > spikelet > panicle > inflorescence	ovary	15	23.7328	3.33777	0.861807	1.84839	0.895	0.311	0.0715339	24.187	21.2213	5.47933	11.752	0.629	0.136	0.0928144	19.8611	3.33695	0.861597	1.84794	0.0204	0.411	0.0232097	3.24265	6.66515	1.72094	3.69103	0.494	0.121	0.00208715	54.8643	12.534	3.23627	6.94109	0.0082	0.777	0.331972	0.280975	0.505709	0.130574	0.280052	0.0011	5.68e-05	0.00428478	54.1309	34.2569	8.84508	18.9708	0.000117
ovule > ovary > pistil > floret > spikelet > panicle > inflorescence	ovule	12	23.6729	3.00724	0.868115	1.91071	NaN	NaN	0.071346	25.5793	23.7169	6.84648	15.069	NaN	NaN	0.0981571	18.9091	2.94452	0.850009	1.87085	NaN	NaN	0.0218988	3.8591	7.37437	2.1288	4.68544	NaN	NaN	0.00248393	50.906	9.99204	2.88445	6.34863	NaN	NaN	0.307343	0.0961579	0.106578	0.0307664	0.0677164	NaN	NaN	0.000687209	40.3527	21.0995	6.09089	13.4059	NaN
ovary wall > ovary > pistil > floret > spikelet > panicle > inflorescence	ovary wall	3	23.9726	5.3045	3.06255	13.1771	NaN	NaN	0.0722856	18.6179	0.751025	0.433604	1.86565	NaN	NaN	0.0714437	23.6692	1.7525	1.01181	4.35347	NaN	NaN	0.0284533	0.776849	0.687267	0.396794	1.70727	NaN	NaN	0.000500023	70.6974	8.97487	5.18164	22.2949	NaN	NaN	0.43049	1.02024	0.838452	0.484081	2.08284	NaN	NaN	0.018675	109.243	8.43024	4.8672	20.9419	NaN
caryopsis > inflorescence	caryopsis	47	11.5294	3.79541	0.553618	1.11437	0.00111	0.0452	0.0332793	47.5037	42.1966	6.155	12.3894	0.000412	0.000728	0.182289	144.14	113.186	16.5099	33.2326	1.57e-08	0.0971	0.194341	2.42267	13.0068	1.89724	3.81894	0.173	0.0102	0.00155936	54.8647	33.4164	4.87428	9.81141	5.12e-05	0.00358	0.331975	38.5163	44.3569	6.47012	13.0237	2.76e-06	6.54e-05	0.748558	10.0529	13.3739	1.95079	3.92674	0.525
embryo > caryopsis > inflorescence	embryo	26	13.0855	2.66185	0.522032	1.07514	NaN	NaN	0.0381573	66.0511	48.2252	9.45774	19.4785	NaN	NaN	0.253462	72.1232	63.8427	12.5206	25.7866	NaN	NaN	0.0951741	0.0830696	0.0775912	0.0152169	0.0313397	NaN	NaN	5.34681e-05	38.3704	31.0549	6.09037	12.5433	NaN	NaN	0.229343	13.9014	12.3969	2.43123	5.0072	NaN	NaN	0.269415	8.92217	4.77219	0.935903	1.92753	NaN
shoot	shoot	1059	39.5846	68.0001	2.08959	4.10021	0.000192	6.81e-06	0.121225	18.2073	47.8985	1.47189	2.88815	0	0	0.069868	84.1862	197.593	6.07189	11.9143	0.00478	9.61e-06	0.111785	0.844153	0.691267	0.0212421	0.0416814	0	0.0135	0.000543343	19.3293	30.0832	0.924433	1.81393	0.0135	0.00335	0.110865	3.03503	2.00474	0.0616042	0.12088	0	0.118	0.0578941	8.52778	15.2377	0.468242	0.918788	0
leaf > shoot	leaf	891	39.6827	72.4319	2.42656	4.76244	0.207	0.000126	0.121533	12.8791	40.8428	1.36828	2.68544	0.000891	0.441	0.0494217	92.614	212.177	7.10821	13.9508	4.87e-07	0.0366	0.12339	0.809586	0.649818	0.0217697	0.0427259	0.0142	0.974	0.000521094	18.2923	32.0821	1.07479	2.10942	0	4.99e-05	0.104412	2.8148	1.98061	0.0663528	0.130226	2.28e-06	0.000228	0.0536072	4.86917	9.62036	0.322294	0.632545	0.00236
blade (lamina) > leaf > shoot	blade (lamina)	36	24.7442	7.55219	1.2587	2.55529	NaN	NaN	0.0747043	34.9858	24.2315	4.03859	8.19876	NaN	NaN	0.134253	265.82	189.272	31.5453	64.0404	NaN	NaN	0.361893	1.06965	0.550722	0.0917869	0.186337	NaN	NaN	0.000688488	82.6068	39.6552	6.60919	13.4174	NaN	NaN	0.504593	1.29467	0.47453	0.0790883	0.160558	NaN	NaN	0.0240169	0.102516	0.133899	0.0223165	0.0453049	NaN
flag leaf > shoot	flag leaf	18	101.444	49.8672	11.7538	24.7983	NaN	NaN	0.315138	5.32086	3.86171	0.910213	1.92038	NaN	NaN	0.0204181	22.8353	17.3847	4.09762	8.64522	NaN	NaN	0.027305	2.51225	0.676935	0.159555	0.336631	NaN	NaN	0.00161702	19.9567	5.22303	1.23108	2.59735	NaN	NaN	0.114769	2.18234	0.806334	0.190055	0.40098	NaN	NaN	0.041296	0.646937	0.537594	0.126712	0.267339	NaN
rhizome	rhizome	200	5.05811	2.79801	0.197849	0.39015	NaN	NaN	0.0129935	56.7849	72.817	5.14894	10.1535	NaN	NaN	0.217904	51.3212	119.869	8.47603	16.7143	NaN	NaN	0.0665299	0.111274	0.125331	0.00886222	0.0174759	NaN	NaN	7.16219e-05	44.0549	30.7339	2.17321	4.28548	NaN	NaN	0.264713	3.38903	1.67185	0.118218	0.23312	NaN	NaN	0.0647849	24.9918	21.1113	1.49279	2.94372	NaN
roots > rhizome	roots	200	5.05811	2.79801	0.197849	0.39015	2.1e-05	6.52e-05	0.0129935	56.7849	72.817	5.14894	10.1535	0	0	0.217904	51.3212	119.869	8.47603	16.7143	0.129	0.00117	0.0665299	0.111274	0.125331	0.00886222	0.0174759	0.0521	8.88e-06	7.16219e-05	44.0549	30.7339	2.17321	4.28548	0.0353	5.07e-09	0.264713	3.38903	1.67185	0.118218	0.23312	0.146	0.101	0.0647849	24.9918	21.1113	1.49279	2.94372	0
nodal root > roots > rhizome	nodal root	2	1.63039	0.254652	0.180066	2.28796	NaN	NaN	0.00224846	22.9204	1.46359	1.03492	13.1498	NaN	NaN	0.087954	3.64587	0.00714777	0.00505424	0.0642201	NaN	NaN	0.00088133	0.0400096	0.0141463	0.010003	0.1271	NaN	NaN	2.57524e-05	67.2059	4.2847	3.02974	38.4965	NaN	NaN	0.408765	4.51608	0.360803	0.255126	3.24168	NaN	NaN	0.0867236	8.73208	0.806472	0.570262	7.24586	NaN
crown root > nodal root > roots > rhizome	crown root	2	1.63039	0.254652	0.180066	2.28796	NaN	NaN	0.00224846	22.9204	1.46359	1.03492	13.1498	NaN	NaN	0.087954	3.64587	0.00714777	0.00505424	0.0642201	NaN	NaN	0.00088133	0.0400096	0.0141463	0.010003	0.1271	NaN	NaN	2.57524e-05	67.2059	4.2847	3.02974	38.4965	NaN	NaN	0.408765	4.51608	0.360803	0.255126	3.24168	NaN	NaN	0.0867236	8.73208	0.806472	0.570262	7.24586	NaN
root tip > crown root > nodal root > roots > rhizome	root tip	2	1.63039	0.254652	0.180066	2.28796	NaN	NaN	0.00224846	22.9204	1.46359	1.03492	13.1498	NaN	NaN	0.087954	3.64587	0.00714777	0.00505424	0.0642201	NaN	NaN	0.00088133	0.0400096	0.0141463	0.010003	0.1271	NaN	NaN	2.57524e-05	67.2059	4.2847	3.02974	38.4965	NaN	NaN	0.408765	4.51608	0.360803	0.255126	3.24168	NaN	NaN	0.0867236	8.73208	0.806472	0.570262	7.24586	NaN
unspecified root type > roots > rhizome	unspecified root type	66	3.91354	1.28424	0.158079	0.315706	NaN	NaN	0.00940555	134.431	79.8609	9.8302	19.6322	NaN	NaN	0.51586	28.3793	24.1533	2.97307	5.93763	NaN	NaN	0.0349391	0.0831925	0.0642454	0.00790806	0.0157935	NaN	NaN	5.35472e-05	36.5794	7.34917	0.90462	1.80665	NaN	NaN	0.218199	3.66503	1.8312	0.225405	0.450165	NaN	NaN	0.0701574	45.3004	23.8167	2.93163	5.85486	NaN
root tip > unspecified root type > roots > rhizome	root tip	66	3.91354	1.28424	0.158079	0.315706	NaN	NaN	0.00940555	134.431	79.8609	9.8302	19.6322	NaN	NaN	0.51586	28.3793	24.1533	2.97307	5.93763	NaN	NaN	0.0349391	0.0831925	0.0642454	0.00790806	0.0157935	NaN	NaN	5.35472e-05	36.5794	7.34917	0.90462	1.80665	NaN	NaN	0.218199	3.66503	1.8312	0.225405	0.450165	NaN	NaN	0.0701574	45.3004	23.8167	2.93163	5.85486	NaN
[truncated: 261 more columns]

## Sheet: USP_all_tissue
Gene ID	Ensembl Gene	Nomenclature	callus	cell culture / primary cell	panicle cell	spikelet cell	floret cell	pistil cell	ovary cell	ovule cell	embryo sac cell	egg cell	caryopsis cell	embryo cell	zygote	seedling	coleoptile	leaf	root	radicle	maturation zone	radicle tip	elongation zone	inflorescence	panicle	spikelet	floret	stamen	anther	pistil	ovary	ovule	ovary wall	caryopsis	embryo	shoot	leaf	blade (lamina)	flag leaf	rhizome	roots	nodal root	crown root	root tip	unspecified root type	root tip
LOC_Os01g07590	OS01G0170600	OsUSP1	19.3829	16.5061	17.3224	17.3224	17.3224	17.3224	17.3224	17.3224	17.3224	17.3224	16.234	16.234	16.234	4.09814	4.64058	6.94855	3.74839	3.74839	1.47352	7.40124	2.37041	23.1756	30.9952	15.2229	16.2968	9.27631	9.27631	19.5145	23.7328	23.6729	23.9726	11.5294	13.0855	39.5846	39.6827	24.7442	101.444	5.05811	5.05811	1.63039	1.63039	1.63039	3.91354	3.91354
LOC_Os01g19820	OS01G0303800	OsUSP2	66.9618	22.9522	46.3348	46.3348	46.3348	46.3348	46.3348	46.3348	46.3348	46.3348	15.158	15.158	15.158	80.7993	135.875	35.334	3.59612	3.59612	1.97024	3.99398	4.82414	35.3421	27.1765	31.5474	32.116	13.3079	13.3079	40.7364	24.187	25.5793	18.6179	47.5037	66.0511	18.2073	12.8791	34.9858	5.32086	56.7849	56.7849	22.9204	22.9204	22.9204	134.431	134.431
LOC_Os01g32780	OS01G0511100	OsUSP3	39.7811	4.65767	6.40076	6.40076	6.40076	6.40076	6.40076	6.40076	6.40076	6.40076	4.07665	4.07665	4.07665	22.2334	22.8972	27.6142	13.8641	13.8641	26.8765	3.38057	11.3351	81.1611	38.875	29.6806	32.062	30.1722	30.1722	32.9281	19.8611	18.9091	23.6692	144.14	72.1232	84.1862	92.614	265.82	22.8353	51.3212	51.3212	3.64587	3.64587	3.64587	28.3793	28.3793
LOC_Os01g39970	OS01G0581400	OsUSP4	0.315123	4.51296	2.62542	2.62542	2.62542	2.62542	2.62542	2.62542	2.62542	2.62542	5.14214	5.14214	5.14214	0.491306	0.498247	1.48138	0.113352	0.113352	0.0966777	0.0833483	0.160031	243.85	405.952	229.77	288.64	913.351	913.351	2.31461	3.24265	3.8591	0.776849	2.42267	0.0830696	0.844153	0.809586	1.06965	2.51225	0.111274	0.111274	0.0400096	0.0400096	0.0400096	0.0831925	0.0831925
LOC_Os01g57450	OS01G0783500	OsUSP5	51.1906	4.82836	5.4141	5.4141	5.4141	5.4141	5.4141	5.4141	5.4141	5.4141	4.63312	4.63312	4.63312	28.1817	16.3611	30.5099	37.9505	37.9505	61.5039	18.3695	33.9781	54.6155	54.4482	62.9974	71.5198	47.5136	47.5136	82.5226	54.8643	50.906	70.6974	54.8647	38.3704	19.3293	18.2923	82.6068	19.9567	44.0549	44.0549	67.2059	67.2059	67.2059	36.5794	36.5794
LOC_Os01g63010	OS01G0849600	OsUSP6	11.1145	0.263024	0.279816	0.279816	0.279816	0.279816	0.279816	0.279816	0.279816	0.279816	0.257427	0.257427	0.257427	4.2157	4.27306	4.73168	2.35809	2.35809	6.2108	0.093347	0.770114	17.4587	3.32007	2.1306	2.39907	2.38535	2.38535	2.40537	0.280975	0.0961579	1.02024	38.5163	13.9014	3.03503	2.8148	1.29467	2.18234	3.38903	3.38903	4.51608	4.51608	4.51608	3.66503	3.66503
LOC_Os01g65440	OS01G0875300	OsUSP7	39.8161	29.2086	55.0864	55.0864	55.0864	55.0864	55.0864	55.0864	55.0864	55.0864	20.5827	20.5827	20.5827	30.5813	17.3957	50.3761	6.01305	6.01305	9.12104	3.82728	5.09083	42.2589	63.883	78.2283	43.4263	30.3597	30.3597	49.4152	54.1309	40.3527	109.243	10.0529	8.92217	8.52778	4.86917	0.102516	0.646937	24.9918	24.9918	8.73208	8.73208	8.73208	45.3004	45.3004
LOC_Os02g05820	OS02G0152300	OsUSP8	0.80032	1.09713	0.6759	0.6759	0.6759	0.6759	0.6759	0.6759	0.6759	0.6759	1.23755	1.23755	1.23755	0.605971	0.808238	0.275242	0.550079	0.550079	0.656749	0.553423	0.440065	2.76855	4.19205	4.32554	5.2598	14.4217	14.4217	1.06059	1.49825	1.75362	0.476785	0.648434	1.0452	0.240218	0.216461	0.21251	0.774743	0.43074	0.43074	0.105025	0.105025	0.105025	0.384297	0.384297
LOC_Os02g12660	OS02G0218400	OsUSP9	3.30633	2.6624	3.15061	3.15061	3.15061	3.15061	3.15061	3.15061	3.15061	3.15061	2.49967	2.49967	2.49967	1.55218	1.83251	2.63237	0.909032	0.909032	0.780094	1.07685	0.870153	14.3357	22.6201	14.9316	18.3298	51.9281	51.9281	2.93061	2.89947	2.87248	3.00741	1.99728	1.87027	2.68173	2.56009	2.88262	2.10575	1.43997	1.43997	0.0450107	0.0450107	0.0450107	0.886929	0.886929
LOC_Os02g12670	OS02G0218600	OsUSP10	0.905375	4.58353	4.12292	4.12292	4.12292	4.12292	4.12292	4.12292	4.12292	4.12292	4.73707	4.73707	4.73707	0.570501	0.330165	3.25794	0.0822353	0.0822353	0.0833439	0.0600102	0.103352	2.55571	3.69196	3.28689	3.88937	4.8313	4.8313	3.45765	3.78336	3.91567	3.25413	0.863423	0.285852	3.60319	3.80359	0.865896	2.55312	0.604734	0.604734	0.0550136	0.0550136	0.0550136	0.924074	0.924074
LOC_Os02g47650	OS02G0705400	OsUSP11	13.1853	11.2159	10.9306	10.9306	10.9306	10.9306	10.9306	10.9306	10.9306	10.9306	11.3109	11.3109	11.3109	15.0585	11.7192	28.6797	6.15299	6.15299	13.0714	3.24054	2.147	25.8726	38.2352	47.0024	57.9293	45.2481	45.2481	63.7415	39.292	38.3057	43.2372	7.46033	3.35133	33.02	36.8656	360.654	10.7768	39.3297	39.3297	2.23553	2.23553	2.23553	70.3203	70.3203
LOC_Os02g47840	OS02G0707900	OsUSP12	80.7331	33.0868	41.8896	41.8896	41.8896	41.8896	41.8896	41.8896	41.8896	41.8896	30.1525	30.1525	30.1525	19.1205	17.5828	25.1874	22.6213	22.6213	16.892	35.5725	15.3993	51.3781	37.9939	38.2591	37.0377	27.2571	27.2571	41.5204	40.0672	35.893	56.7639	71.3121	62.4206	44.9868	48.5303	118.589	11.6086	36.0097	36.0097	30.8173	30.8173	30.8173	28.9975	28.9975
LOC_Os02g52314	OS02G0760500	OsUSP13	24.6449	3.23933	8.14654	8.14654	8.14654	8.14654	8.14654	8.14654	8.14654	8.14654	1.60359	1.60359	1.60359	107.25	127.191	43.308	134.106	134.106	193.705	44.4537	164.16	36.6144	43.3915	36.9057	35.7532	40.4304	40.4304	33.6095	26.952	24.5994	36.3623	26.5209	34.956	30.3397	26.934	68.5972	18.6111	80.3183	80.3183	126.94	126.94	126.94	78.2203	78.2203
LOC_Os02g53320	OS02G0773200	OsUSP14	5.15208	6.22263	5.25726	5.25726	5.25726	5.25726	5.25726	5.25726	5.25726	5.25726	6.54442	6.54442	6.54442	13.0477	5.08417	5.52743	25.4069	25.4069	61.9985	0.913461	13.3088	12.6818	8.25178	6.00447	6.26896	3.02234	3.02234	7.757	3.8862	3.04064	7.26843	19.2797	8.67295	11.3337	10.6825	0.463482	0.848228	28.9798	28.9798	51.4722	51.4722	51.4722	36.5615	36.5615
LOC_Os02g54590	OS02G0787200	OsUSP15	4.42178	0.401991	0.232985	0.232985	0.232985	0.232985	0.232985	0.232985	0.232985	0.232985	0.458326	0.458326	0.458326	0.366438	0.557955	0.237705	0.138909	0.138909	0.200027	0.11335	0.10335	6.42592	10.5641	8.23697	9.95127	27.8478	27.8478	1.74869	0.903081	0.886292	0.970238	0.262683	0.215786	0.21048	0.212346	0.322636	0.296283	0.549274	0.549274	0.0150038	0.0150038	0.0150038	1.1256	1.1256
LOC_Os03g13820	OS03G0241600	OsUSP16	5.17707	0.649707	1.09875	1.09875	1.09875	1.09875	1.09875	1.09875	1.09875	1.09875	0.500027	0.500027	0.500027	26.9829	13.249	67.7192	27.1257	27.1257	66.8216	5.61092	8.94445	18.2468	25.8188	31.3807	37.6278	40.4716	40.4716	36.3244	11.4811	6.46023	31.5644	6.9693	3.95997	13.4278	12.1144	28.3708	13.5577	37.0056	37.0056	12.443	12.443	12.443	41.1324	41.1324
LOC_Os03g19270	OS03G0305400	OsUSP17	91.5165	55.0814	98.8618	98.8618	98.8618	98.8618	98.8618	98.8618	98.8618	98.8618	40.488	40.488	40.488	77.871	155.166	9.20625	2.16693	2.16693	3.54373	1.63691	1.32016	88.6117	29.2593	44.2395	48.3917	14.1961	14.1961	64.0647	63.8314	65.2908	57.9939	177.009	240.85	20.6889	8.74338	2.84789	1.83301	97.3712	97.3712	1.70541	1.70541	1.70541	282.981	282.981
LOC_Os03g22390	OS03G0344166	OsUSP18	0	0.182884	0.0406169	0.0406169	0.0406169	0.0406169	0.0406169	0.0406169	0.0406169	0.0406169	0.230306	0.230306	0.230306	0.31525	0.0839098	1.12357	0.210029	0.210029	0.320035	0.120022	0.190031	1.31006	2.13695	3.11896	3.89036	5.33258	5.33258	3.22935	0.633967	0.447371	1.38035	0.0785179	0.0322562	0.178014	0.181016	0.288445	0.0620795	2.37852	2.37852	0.190047	0.190047	0.190047	5.58192	5.58192
LOC_Os03g53900	OS03G0750000	OsUSP19	33.2186	34.0424	24.7258	24.7258	24.7258	24.7258	24.7258	24.7258	24.7258	24.7258	37.148	37.148	37.148	1.20199	1.69623	0.202684	1.24125	1.24125	2.73364	0.226696	0.763407	97.7436	25.785	21.7575	26.9852	27.8527	27.8527	26.5876	10.231	9.61718	12.6864	204.916	132.618	0.722815	0.812012	2.77424	0.0900288	5.56984	5.56984	0.160037	0.160037	0.160037	9.6601	9.6601
LOC_Os03g62340	OS03G0839900	OsUSP20	17.5571	19.5791	26.6697	26.6697	26.6697	26.6697	26.6697	26.6697	26.6697	26.6697	17.2156	17.2156	17.2156	22.432	17.6858	25.44	24.4157	24.4157	28.4767	16.0292	28.7414	35.5519	46.8413	38.5922	40.0968	39.7621	39.7621	40.2502	41.7559	42.3442	39.403	18.7377	24.7633	38.8409	40.5983	55.7088	43.6847	47.3655	47.3655	6.24649	6.24649	6.24649	61.3287	61.3287
LOC_Os05g06500	OS05G0157200	OsUSP21	157.039	33.9234	44.6114	44.6114	44.6114	44.6114	44.6114	44.6114	44.6114	44.6114	30.3607	30.3607	30.3607	189.74	227.138	185.31	149.639	149.639	220.685	84.9836	143.25	123.094	126.228	113.626	109.662	84.7122	84.7122	121.098	96.4211	86.7656	135.043	118.427	91.8657	78.708	69.9934	143.581	187.903	118.663	118.663	86.4906	86.4906	86.4906	143.838	143.838
LOC_Os05g07810	OS05G0170200	OsUSP22	1.82072	0.123004	0.105406	0.105406	0.105406	0.105406	0.105406	0.105406	0.105406	0.105406	0.12887	0.12887	0.12887	0.857112	1.05453	1.14854	0.118904	0.118904	0.240027	0.0800152	0.0366697	2.72486	1.656	1.98357	2.34254	0.127491	0.127491	3.35777	0.0313692	0.0142051	0.100026	4.31677	2.27224	4.71375	4.03285	22.447	0.769594	5.88002	5.88002	2.60062	2.60062	2.60062	11.1248	11.1248
LOC_Os05g28740	Os05g0355400	OsUSP23	31.7078	6.40191	4.7353	4.7353	4.7353	4.7353	4.7353	4.7353	4.7353	4.7353	6.95744	6.95744	6.95744	19.1246	22.2437	65.5237	0.360054	0.360054	0.340039	0.420063	0.32006	74.2352	92.2899	41.7402	46.1195	18.627	18.627	58.7202	6.03147	5.46882	8.28206	47.3453	9.00037	316.026	330.795	2673.55	11.6797	96.4081	96.4081	1.74541	1.74541	1.74541	168.418	168.418
LOC_Os05g35380	Os05g0428400	OsUSP24	2.38096	14.7133	25.5375	25.5375	25.5375	25.5375	25.5375	25.5375	25.5375	25.5375	11.1053	11.1053	11.1053	9.54483	6.57213	10.8318	18.3586	18.3586	7.50763	16.0693	31.499	37.7652	58.5787	83.019	87.0042	42.8998	42.8998	107.219	130.123	109.297	213.426	6.76632	4.61034	1.61705	0.520964	0.0087642	0.00279642	5.54683	5.54683	14.1384	14.1384	14.1384	8.1389	8.1389
LOC_Os05g37970	Os05g0453700	OsUSP25	77.1912	76.189	85.1133	85.1133	85.1133	85.1133	85.1133	85.1133	85.1133	85.1133	73.2142	73.2142	73.2142	96.5963	58.2183	32.7568	163.611	163.611	129.859	142.379	218.595	62.4077	63.2922	77.2794	89.67	62.5681	62.5681	102.092	72.8471	67.1549	95.6163	61.0903	77.7277	6.68058	3.94088	3.24454	0.225676	182.948	182.948	242.598	242.598	242.598	315.462	315.462
LOC_Os05g42230	Os05g0501700	OsUSP26	47.4539	13.0304	10.6667	10.6667	10.6667	10.6667	10.6667	10.6667	10.6667	10.6667	13.8182	13.8182	13.8182	24.7656	7.17905	26.3979	54.9853	54.9853	27.2564	82.3535	55.3458	54.2364	71.8195	77.6429	75.0431	40.0479	40.0479	91.0825	102.821	106.048	89.9122	28.0489	10.1751	12.4745	11.3033	36.2682	25.3017	21.2577	21.2577	115.342	115.342	115.342	26.0863	26.0863
LOC_Os06g04880	Os06g0140800	OsUSP27	17.9723	27.7256	29.9053	29.9053	29.9053	29.9053	29.9053	29.9053	29.9053	29.9053	26.999	26.999	26.999	45.9201	66.2368	31.9812	11.016	11.016	18.8123	4.91745	9.31813	20.0986	21.6241	23.2417	24.5777	16.0896	16.0896	28.4681	19.2513	19.6272	17.7477	17.8265	25.5708	40.9448	40.8573	40.566	40.2684	47.8492	47.8492	2.67564	2.67564	2.67564	37.6462	37.6462
LOC_Os06g09230	Os06g0191900	OsUSP28	0.790315	0.696207	0.912705	0.912705	0.912705	0.912705	0.912705	0.912705	0.912705	0.912705	0.624041	0.624041	0.624041	0.514761	0.206991	0.623031	0.963466	0.963466	1.47683	0.39006	1.02351	22.4749	37.3783	25.4482	31.5961	91.7021	91.7021	4.04748	5.19846	4.17417	9.29561	0.278296	0.0626527	0.909931	0.902354	0.389257	0.973558	0.451313	0.451313	2.06549	2.06549	2.06549	0.211542	0.211542
LOC_Os06g37620	Os06g0574200	OsUSP29	30.4324	14.9045	30.1638	30.1638	30.1638	30.1638	30.1638	30.1638	30.1638	30.1638	9.81807	9.81807	9.81807	18.1781	26.5196	14.2581	12.7704	12.7704	24.6061	6.01761	7.68758	20.9051	21.6821	29.5316	33.4349	17.2582	17.2582	40.8492	32.6448	31.7446	36.2455	19.7477	30.0853	17.233	17.5882	50.7863	13.3121	35.4919	35.4919	4.79614	4.79614	4.79614	61.5605	61.5605
LOC_Os07g36600	Os07g0551400	OsUSP30	42.8321	25.3945	39.0369	39.0369	39.0369	39.0369	39.0369	39.0369	39.0369	39.0369	20.847	20.847	20.847	35.3937	29.5293	40.7832	50.5206	50.5206	64.5679	37.3426	49.6512	46.6826	57.0261	64.3606	69.4259	57.8935	57.8935	74.7116	73.4841	77.5408	57.2574	31.2774	32.0373	38.7956	39.7687	106.747	18.6112	74.8957	74.8957	44.7406	44.7406	44.7406	100.542	100.542
LOC_Os07g47620	Os07g0673400	OsUSP31	9.67385	54.438	47.3468	47.3468	47.3468	47.3468	47.3468	47.3468	47.3468	47.3468	56.8017	56.8017	56.8017	3.41976	4.96677	6.80871	0.208919	0.208919	0.120012	0.233375	0.27337	9.91968	14.8355	21.082	24.2685	13.485	13.485	29.211	36.3298	33.6385	47.0949	2.59819	2.30659	10.9316	9.02518	25.5921	4.26724	23.7538	23.7538	0.940224	0.940224	0.940224	69.6557	69.6557
LOC_Os08g15060	Os08g0249100	OsUSP32	0.325133	0.105943	0.314393	0.314393	0.314393	0.314393	0.314393	0.314393	0.314393	0.314393	0.0364602	0.0364602	0.0364602	6.03831	3.09663	8.82009	5.06735	5.06735	12.8017	0.190028	2.21034	2.91066	4.77452	1.88649	1.65351	0.261339	0.261339	2.29159	0.362905	0.267753	0.743515	0.134685	0.0506029	5.53587	4.85762	0.369968	0.389889	7.90802	7.90802	1.34032	1.34032	1.34032	6.56158	6.56158
LOC_Os09g39620	Os09g0569800	OsUSP33	6.59767	4.62913	4.00778	4.00778	4.00778	4.00778	4.00778	4.00778	4.00778	4.00778	4.83625	4.83625	4.83625	3.18507	4.36015	1.40376	2.37701	2.37701	2.84033	2.51708	1.77363	3.07649	3.387	2.67177	2.92159	1.12002	1.12002	3.74731	3.61944	3.56156	3.85095	2.61403	3.73523	3.48432	2.98653	5.06423	10.2969	11.8097	11.8097	0.410098	0.410098	0.410098	5.13993	5.13993
LOC_Os09g39640	Os09g0570000	OsUSP34	26.1457	7.85694	8.75455	8.75455	8.75455	8.75455	8.75455	8.75455	8.75455	8.75455	7.55774	7.55774	7.55774	12.5053	19.6188	6.71347	5.16299	5.16299	5.57068	4.89081	5.0275	13.9265	11.2846	9.76628	10.169	6.69567	6.69567	11.7609	11.9141	12.6071	9.14226	17.8612	23.0011	9.85502	9.69005	6.3265	11.3257	15.3464	15.3464	0.63015	0.63015	0.63015	11.9571	11.9571
LOC_Os10g01060	Os10g0100500	OsUSP35	2.34095	1.21971	0.967253	0.967253	0.967253	0.967253	0.967253	0.967253	0.967253	0.967253	1.30386	1.30386	1.30386	17.2845	30.3759	5.74274	2.57033	2.57033	5.3106	0.810133	1.59026	8.50996	4.63796	4.4442	4.57579	2.35248	2.35248	5.59481	2.77382	2.10026	5.46802	14.2768	23.3162	10.7765	10.1007	9.14858	14.834	29.6953	29.6953	0.505122	0.505122	0.505122	10.3968	10.3968
LOC_Os10g30150	Os10g0437500	OsUSP36	140.966	9.78296	6.71076	6.71076	6.71076	6.71076	6.71076	6.71076	6.71076	6.71076	10.807	10.807	10.807	18.6052	37.3214	0.9484	0.603404	0.603404	1.19012	0.266711	0.353375	47.0089	8.93088	13.1631	12.9836	5.07875	5.07875	16.6066	13.6081	15.9148	4.38107	103.721	94.239	6.95476	1.78481	23.8852	0.00670597	26.8868	26.8868	1.74042	1.74042	1.74042	78.1962	78.1962
LOC_Os10g32590	Os10g0463300	OsUSP37	0	1.06146	1.09801	1.09801	1.09801	1.09801	1.09801	1.09801	1.09801	1.09801	1.04928	1.04928	1.04928	0.00184891	0.0038586	0	0	0	0	0	0	38.537	64.2487	35.4616	44.5802	140.935	140.935	0.417576	0.668122	0.798477	0.1467	0.242999	0	0.0078528	0.00833937	0	0.00452817	0.00393412	0.00393412	0	0	0	0.00287942	0.00287942
LOC_Os10g41220	Os10g0561500	OsUSP38	8.18332	6.81462	8.9288	8.9288	8.9288	8.9288	8.9288	8.9288	8.9288	8.9288	6.10989	6.10989	6.10989	5.26003	7.35595	1.78912	5.1619	5.1619	4.13385	6.80443	4.54743	5.98473	6.19701	7.20954	7.22845	10.2408	10.2408	5.8478	7.03685	7.41155	5.53804	5.66857	8.95113	2.00327	1.56588	0.815805	0.332684	2.63315	2.63315	0.750179	0.750179	0.750179	2.79219	2.79219
LOC_Os11g08950	Os11g0194900	OsUSP39	28.0464	7.99674	11.1827	11.1827	11.1827	11.1827	11.1827	11.1827	11.1827	11.1827	6.93475	6.93475	6.93475	27.2754	23.1997	16.855	51.6431	51.6431	53.61	35.1855	66.1339	28.9348	22.5247	19.6373	19.6109	10.5861	10.5861	23.7473	26.5757	28.015	20.8185	38.4819	53.4731	25.1451	22.2934	13.2542	26.9783	47.6112	47.6112	20.0098	20.0098	20.0098	46.9925	46.9925
LOC_Os12g07990	Os12g0180500	OsUSP40	0.405157	0.0338559	0.0294528	0.0294528	0.0294528	0.0294528	0.0294528	0.0294528	0.0294528	0.0294528	0.0353236	0.0353236	0.0353236	0.90148	0.317485	0.0150116	2.62479	2.62479	3.62373	0.71678	3.53386	0.330117	0.295025	0.329917	0.366147	0.284912	0.284912	0.403379	0.526725	0.574218	0.336751	0.382382	0.614272	0.0598246	0.0607447	0.0627005	0.125475	2.02657	2.02657	2.1055	2.1055	2.1055	2.46881	2.46881
LOC_Os12g08060	Os12g0181200	OsUSP41	4.76194	1.33999	0.0343591	0.0343591	0.0343591	0.0343591	0.0343591	0.0343591	0.0343591	0.0343591	1.7752	1.7752	1.7752	0.838886	0.726972	0.262723	1.6358	1.6358	1.29348	2.57043	1.0435	1.5484	1.69771	1.84795	1.82678	0.0709798	0.0709798	2.63152	3.26364	3.51108	2.27389	1.32601	1.75177	0.192513	0.120665	0.121143	0.472961	0.57642	0.57642	0.565135	0.565135	0.565135	0.415203	0.415203
LOC_Os12g31710	Os12g0501400	OsUSP42	0.0600266	0.0943424	0.0996646	0.0996646	0.0996646	0.0996646	0.0996646	0.0996646	0.0996646	0.0996646	0.0925683	0.0925683	0.0925683	2.72274	2.22625	3.3728	0.267822	0.267822	0.453398	0.0400067	0.31006	0.306336	0.407106	0.39496	0.19063	0.341126	0.341126	0.121653	0.171977	0.170793	0.17671	0.156254	0.223582	0.359642	0.143234	0	0	0.183418	0.183418	0.0600143	0.0600143	0.0600143	0.196239	0.196239
LOC_Os12g36630	Os12g0552400	OsUSP43	3.60148	2.73045	1.69072	1.69072	1.69072	1.69072	1.69072	1.69072	1.69072	1.69072	3.07703	3.07703	3.07703	4.62401	5.28722	8.69016	2.67922	2.67922	5.90401	0.0600108	2.07363	15.2408	23.3715	31.4934	38.6077	87.7154	87.7154	16.1001	3.75635	3.16756	6.11152	3.1313	2.81748	9.56697	10.3566	56.8295	2.61519	10.0772	10.0772	1.07526	1.07526	1.07526	10.4202	10.4202
LOC_Os12g36640	Os12g0552500	OsUSP44	72.1039	41.9201	65.4093	65.4093	65.4093	65.4093	65.4093	65.4093	65.4093	65.4093	34.0903	34.0903	34.0903	160.194	113.263	285.878	78.1645	78.1645	180.039	8.99469	45.46	223.812	322.023	276.114	312.654	334.037	334.037	302.854	121.757	88.8803	253.266	77.5402	26.9217	192.805	192.965	869.356	153.161	242.1	242.1	85.4553	85.4553	85.4553	219.987	219.987

## Sheet: USP_sorted_tissue_+_log_trans
Gene ID	Ensembl Gene	Nomenclature	Callus	Seedling	Inflorescence	Embryo	Shoot	Leaf	Roots
LOC_Os01g07590	OS01G0170600	OsUSP1	1.28742	0.612586	1.36503	1.11679	1.59753	1.5986	0.703989
LOC_Os01g19820	OS01G0303800	OsUSP2	1.82583	1.90741	1.54829	1.81988	1.26025	1.10988	1.75423
LOC_Os01g32780	OS01G0511100	OsUSP3	1.59968	1.34701	1.90935	1.85807	1.92524	1.96668	1.7103
LOC_Os01g39970	OS01G0581400	OsUSP4	-0.501519	-0.308648	2.38712	-1.08056	-0.0735787	-0.091737	-0.953607
LOC_Os01g57450	OS01G0783500	OsUSP5	1.70919	1.44997	1.73732	1.584	1.28622	1.26227	1.64399
LOC_Os01g63010	OS01G0849600	OsUSP6	1.04589	0.62487	1.24201	1.14306	0.482163	0.449448	0.530075
LOC_Os01g65440	OS01G0875300	OsUSP7	1.60006	1.48546	1.62592	0.95047	0.930836	0.687455	1.3978
LOC_Os02g05820	OS02G0152300	OsUSP8	-0.0967365	-0.217548	0.442252	0.0191982	-0.619394	-0.664621	-0.365784
LOC_Os02g12660	OS02G0218400	OsUSP9	0.519346	0.190941	1.15642	0.271903	0.428415	0.408255	0.158353
LOC_Os02g12670	OS02G0218600	OsUSP10	-0.0431717	-0.243744	0.407512	-0.543858	0.556687	0.580194	-0.218436
LOC_Os02g47650	OS02G0705400	OsUSP11	1.12009	1.17778	1.41284	0.525218	1.51878	1.56662	1.59472
LOC_Os02g47840	OS02G0707900	OsUSP12	1.90705	1.2815	1.71078	1.79533	1.65309	1.68601	1.55642
LOC_Os02g52314	OS02G0760500	OsUSP13	1.39173	2.0304	1.56365	1.54352	1.48201	1.4303	1.90481
LOC_Os02g53320	OS02G0773200	OsUSP14	0.711983	1.11553	1.10318	0.938167	1.05437	1.02867	1.46209
LOC_Os02g54590	OS02G0787200	OsUSP15	0.645597	-0.436	0.807935	-0.665977	-0.676789	-0.672957	-0.260211
LOC_Os03g13820	OS03G0241600	OsUSP16	0.714084	1.43109	1.26119	0.597692	1.12801	1.0833	1.56827
LOC_Os03g19270	OS03G0305400	OsUSP17	1.9615	1.89138	1.94749	2.38175	1.31574	0.941679	1.98843
LOC_Os03g22390	OS03G0344166	OsUSP18	0	-0.501345	0.11729	-1.49139	-0.749545	-0.742282	0.376306
LOC_Os03g53900	OS03G0750000	OsUSP19	1.52138	0.079901	1.99009	2.1226	-0.140973	-0.0904378	0.745842
LOC_Os03g62340	OS03G0839900	OsUSP20	1.24445	1.35087	1.55086	1.39381	1.58929	1.60851	1.67546
LOC_Os05g06500	OS05G0157200	OsUSP21	2.19601	2.27816	2.09024	1.96315	1.89602	1.84506	2.07432
LOC_Os05g07810	OS05G0170200	OsUSP22	0.260243	-0.0669622	0.435344	0.356454	0.673367	0.605612	0.769379
LOC_Os05g28740	Os05g0355400	OsUSP23	1.50117	1.28159	1.87061	0.95426	2.49972	2.51956	1.98411
LOC_Os05g35380	Os05g0428400	OsUSP24	0.376752	0.979768	1.57709	0.663733	0.208723	-0.283192	0.744045
LOC_Os05g37970	Os05g0453700	OsUSP25	1.88757	1.98496	1.79524	1.89058	0.824814	0.595593	2.26233
LOC_Os05g42230	Os05g0501700	OsUSP26	1.67627	1.39385	1.73429	1.00754	1.09602	1.0532	1.32752
LOC_Os06g04880	Os06g0140800	OsUSP27	1.2546	1.662	1.30317	1.40774	1.6122	1.61127	1.67987
LOC_Os06g09230	Os06g0191900	OsUSP28	-0.1022	-0.288394	1.3517	-1.20306	-0.0409917	-0.0446229	-0.345522
LOC_Os06g37620	Os06g0574200	OsUSP29	1.48334	1.25955	1.32025	1.47835	1.23636	1.24522	1.55013
LOC_Os07g36600	Os07g0551400	OsUSP30	1.63177	1.54893	1.66915	1.50566	1.58878	1.59954	1.87446
LOC_Os07g47620	Os07g0673400	OsUSP31	0.985599	0.533996	0.996498	0.362971	1.03868	0.955456	1.37573
LOC_Os08g15060	Os08g0249100	OsUSP32	-0.487939	0.780916	0.463991	-1.29582	0.743186	0.686424	0.898068
LOC_Os09g39620	Os09g0569800	OsUSP33	0.819391	0.503119	0.488056	0.572318	0.542118	0.475168	1.07224
LOC_Os09g39640	Os09g0570000	OsUSP34	1.4174	1.09709	1.14384	1.36175	0.993657	0.986326	1.18601
LOC_Os10g01060	Os10g0100500	OsUSP35	0.369392	1.23766	0.929927	1.36766	1.03248	1.00435	1.47269
LOC_Os10g30150	Os10g0437500	OsUSP36	2.14911	1.26963	1.67218	1.97423	0.842282	0.251592	1.42954
LOC_Os10g32590	Os10g0463300	OsUSP37	0	-2.73308	1.58588	0	-2.10498	-2.07887	-2.40515
LOC_Os10g41220	Os10g0561500	OsUSP38	0.91293	0.720988	0.777045	0.951878	0.30174	0.194757	0.420476
LOC_Os11g08950	Os11g0194900	OsUSP39	1.44788	1.43577	1.46142	1.72814	1.40045	1.34818	1.67771
LOC_Os12g07990	Os12g0180500	OsUSP40	-0.392376	-0.0450437	-0.481332	-0.211639	-1.22312	-1.21649	0.306762
LOC_Os12g08060	Os12g0181200	OsUSP41	0.677784	-0.0762973	0.189882	0.243476	-0.715539	-0.918418	-0.239261
LOC_Os12g31710	Os12g0501400	OsUSP42	-1.22166	0.435007	-0.513802	-0.650564	-0.44413	-0.843954	-0.736559
LOC_Os12g36630	Os12g0552400	OsUSP43	0.556481	0.665019	1.18301	0.44986	0.980774	1.01522	1.00334
LOC_Os12g36640	Os12g0552500	OsUSP44	1.85796	2.20465	2.34988	1.4301	2.28512	2.28548	2.384
