# Supplementary material for: Comprehensive in silico Characterization of Universal Stress Proteins in Rice (Oryza sativa L.) With Insight Into Their Stress-Specific Transcriptional Modulation
Source: Front Plant Sci. 2021 Jul 28;12:712607. doi: 10.3389/fpls.2021.712607 (PMC8355530; doi:10.3389/fpls.2021.712607)
Supplement: Supplementary file 4 [file Table_2.XLSX]

## Sheet: Genevestigator data export
(linear scale)	Ensembl Gene	OS01G0170600	OS01G0170600	OS01G0170600	OS01G0170600	OS01G0170600	OS01G0303800	OS01G0303800	OS01G0303800	OS01G0303800	OS01G0303800	OS01G0511100	OS01G0511100	OS01G0511100	OS01G0511100	OS01G0511100	OS01G0581400	OS01G0581400	OS01G0581400	OS01G0581400	OS01G0581400	OS01G0783500	OS01G0783500	OS01G0783500	OS01G0783500	OS01G0783500	OS01G0849600	OS01G0849600	OS01G0849600	OS01G0849600	OS01G0849600	OS01G0875300	OS01G0875300	OS01G0875300	OS01G0875300	OS01G0875300	OS02G0152300	OS02G0152300	OS02G0152300	OS02G0152300	OS02G0152300	OS02G0218400	OS02G0218400	OS02G0218400	OS02G0218400	OS02G0218400	OS02G0218600	OS02G0218600	OS02G0218600
	MSU Locus	LOC_Os01g07590	LOC_Os01g07590	LOC_Os01g07590	LOC_Os01g07590	LOC_Os01g07590	LOC_Os01g19820	LOC_Os01g19820	LOC_Os01g19820	LOC_Os01g19820	LOC_Os01g19820	LOC_Os01g32780	LOC_Os01g32780	LOC_Os01g32780	LOC_Os01g32780	LOC_Os01g32780	LOC_Os01g39970	LOC_Os01g39970	LOC_Os01g39970	LOC_Os01g39970	LOC_Os01g39970	LOC_Os01g57450	LOC_Os01g57450	LOC_Os01g57450	LOC_Os01g57450	LOC_Os01g57450	LOC_Os01g63010	LOC_Os01g63010	LOC_Os01g63010	LOC_Os01g63010	LOC_Os01g63010	LOC_Os01g65440	LOC_Os01g65440	LOC_Os01g65440	LOC_Os01g65440	LOC_Os01g65440	LOC_Os02g05820	LOC_Os02g05820	LOC_Os02g05820	LOC_Os02g05820	LOC_Os02g05820	LOC_Os02g12660	LOC_Os02g12660	LOC_Os02g12660	LOC_Os02g12660	LOC_Os02g12660	LOC_Os02g12670	LOC_Os02g12670	LOC_Os02g12670
	MSU Transcript	LOC_Os01g07590.1	LOC_Os01g07590.1	LOC_Os01g07590.1	LOC_Os01g07590.1	LOC_Os01g07590.1	LOC_Os01g19820.1,LOC_Os01g19820.2,LOC_Os01g19820.3,LOC_Os01g19820.4	LOC_Os01g19820.1,LOC_Os01g19820.2,LOC_Os01g19820.3,LOC_Os01g19820.4	LOC_Os01g19820.1,LOC_Os01g19820.2,LOC_Os01g19820.3,LOC_Os01g19820.4	LOC_Os01g19820.1,LOC_Os01g19820.2,LOC_Os01g19820.3,LOC_Os01g19820.4	LOC_Os01g19820.1,LOC_Os01g19820.2,LOC_Os01g19820.3,LOC_Os01g19820.4	LOC_Os01g32780.1	LOC_Os01g32780.1	LOC_Os01g32780.1	LOC_Os01g32780.1	LOC_Os01g32780.1	LOC_Os01g39970.1	LOC_Os01g39970.1	LOC_Os01g39970.1	LOC_Os01g39970.1	LOC_Os01g39970.1	LOC_Os01g57450.1	LOC_Os01g57450.1	LOC_Os01g57450.1	LOC_Os01g57450.1	LOC_Os01g57450.1	LOC_Os01g63010.1	LOC_Os01g63010.1	LOC_Os01g63010.1	LOC_Os01g63010.1	LOC_Os01g63010.1	LOC_Os01g65440.1	LOC_Os01g65440.1	LOC_Os01g65440.1	LOC_Os01g65440.1	LOC_Os01g65440.1	LOC_Os02g05820.1	LOC_Os02g05820.1	LOC_Os02g05820.1	LOC_Os02g05820.1	LOC_Os02g05820.1	LOC_Os02g12660.1	LOC_Os02g12660.1	LOC_Os02g12660.1	LOC_Os02g12660.1	LOC_Os02g12660.1	LOC_Os02g12670.1	LOC_Os02g12670.1	LOC_Os02g12670.1
	Gene	LOC_Os01g07590	LOC_Os01g07590	LOC_Os01g07590	LOC_Os01g07590	LOC_Os01g07590	LOC_Os01g19820	LOC_Os01g19820	LOC_Os01g19820	LOC_Os01g19820	LOC_Os01g19820	LOC_Os01g32780	LOC_Os01g32780	LOC_Os01g32780	LOC_Os01g32780	LOC_Os01g32780	LOC_Os01g39970	LOC_Os01g39970	LOC_Os01g39970	LOC_Os01g39970	LOC_Os01g39970	LOC_Os01g57450	LOC_Os01g57450	LOC_Os01g57450	LOC_Os01g57450	LOC_Os01g57450	LOC_Os01g63010	LOC_Os01g63010	LOC_Os01g63010	LOC_Os01g63010	LOC_Os01g63010	LOC_Os01g65440	LOC_Os01g65440	LOC_Os01g65440	LOC_Os01g65440	LOC_Os01g65440	LOC_Os02g05820	LOC_Os02g05820	LOC_Os02g05820	LOC_Os02g05820	LOC_Os02g05820	LOC_Os02g12660	LOC_Os02g12660	LOC_Os02g12660	LOC_Os02g12660	LOC_Os02g12660	LOC_Os02g12670	LOC_Os02g12670	LOC_Os02g12670
	Measure	LOC_Os01g07590	LOC_Os01g07590	LOC_Os01g07590	LOC_Os01g07590	LOC_Os01g07590	LOC_Os01g19820	LOC_Os01g19820	LOC_Os01g19820	LOC_Os01g19820	LOC_Os01g19820	LOC_Os01g32780	LOC_Os01g32780	LOC_Os01g32780	LOC_Os01g32780	LOC_Os01g32780	LOC_Os01g39970	LOC_Os01g39970	LOC_Os01g39970	LOC_Os01g39970	LOC_Os01g39970	LOC_Os01g57450	LOC_Os01g57450	LOC_Os01g57450	LOC_Os01g57450	LOC_Os01g57450	LOC_Os01g63010	LOC_Os01g63010	LOC_Os01g63010	LOC_Os01g63010	LOC_Os01g63010	LOC_Os01g65440	LOC_Os01g65440	LOC_Os01g65440	LOC_Os01g65440	LOC_Os01g65440	LOC_Os02g05820	LOC_Os02g05820	LOC_Os02g05820	LOC_Os02g05820	LOC_Os02g05820	LOC_Os02g12660	LOC_Os02g12660	LOC_Os02g12660	LOC_Os02g12660	LOC_Os02g12660	LOC_Os02g12670	LOC_Os02g12670	LOC_Os02g12670
Development	# samples	Mean value	Standard Deviation	Standard Error	Conf. Int. (95%) Half-width	Ratio of Expression Potential	Mean value	Standard Deviation	Standard Error	Conf. Int. (95%) Half-width	Ratio of Expression Potential	Mean value	Standard Deviation	Standard Error	Conf. Int. (95%) Half-width	Ratio of Expression Potential	Mean value	Standard Deviation	Standard Error	Conf. Int. (95%) Half-width	Ratio of Expression Potential	Mean value	Standard Deviation	Standard Error	Conf. Int. (95%) Half-width	Ratio of Expression Potential	Mean value	Standard Deviation	Standard Error	Conf. Int. (95%) Half-width	Ratio of Expression Potential	Mean value	Standard Deviation	Standard Error	Conf. Int. (95%) Half-width	Ratio of Expression Potential	Mean value	Standard Deviation	Standard Error	Conf. Int. (95%) Half-width	Ratio of Expression Potential	Mean value	Standard Deviation	Standard Error	Conf. Int. (95%) Half-width	Ratio of Expression Potential	Mean value	Standard Deviation	Standard Error
germination	83	7.90575	4.75572	0.522008	1.03844	0.0219201	72.4993	66.2351	7.27025	14.4628	0.278206	88.1312	103.98	11.4133	22.7046	0.117217	0.315455	0.556983	0.0611369	0.121621	0.000203044	40.999	31.1817	3.42263	6.80871	0.245699	23.8041	37.2984	4.09404	8.14434	0.462177	21.1313	24.2789	2.66496	5.30144	0.0924852	0.650743	0.573367	0.0629352	0.125198	0.0807292	1.72938	0.898585	0.0986325	0.196211	0.0279251	0.481656	0.705305	0.0774173
seedling	823	23.0546	42.2541	1.47289	2.89106	0.0694078	24.0205	53.2045	1.85459	3.64029	0.0921755	95.4514	205.165	7.15161	14.0376	0.127297	0.688998	0.680706	0.0237279	0.0465744	0.000443477	25.8303	34.7928	1.2128	2.38055	0.151316	3.12021	2.11546	0.0737404	0.144742	0.0595522	12.4782	16.8421	0.587079	1.15235	0.0546133	0.2928	0.270048	0.00941329	0.0184769	0.0363239	2.43306	2.02907	0.0707289	0.13883	0.0402889	3.20183	2.6374	0.0919339
tillering stage	371	39.6333	80.9323	4.20179	8.26239	0.121378	28.0283	61.035	3.16878	6.23108	0.107555	35.5425	89.6906	4.65651	9.15653	0.0448028	0.606633	0.478241	0.0248291	0.0488237	0.000390462	16.7312	21.0336	1.09201	2.14732	0.0946986	2.91677	1.63533	0.0849022	0.166951	0.0555921	10.1155	19.2785	1.00089	1.96814	0.0442724	0.175448	0.166012	0.0086189	0.0169482	0.0217656	2.09991	1.7437	0.0905283	0.178015	0.0344354	3.19765	2.2781	0.118273
stem elongation stage	23	48.8806	39.0865	8.1501	16.9023	0.150366	15.513	20.7187	4.32015	8.95943	0.059529	287.594	462.558	96.45	200.025	0.391876	0.994367	0.85866	0.179043	0.371312	0.000640029	60.1407	45.019	9.38712	19.4677	0.364804	1.73899	1.40017	0.291956	0.605479	0.0326659	31.9104	39.3246	8.19974	17.0052	0.139662	0.948223	0.822481	0.171499	0.355667	0.117634	4.48325	2.31577	0.482871	1.00141	0.076311	1.13396	1.0717	0.223464
booting stage	36	44.9512	84.1787	14.0298	28.482	0.138048	22.2158	22.118	3.68633	7.48363	0.08525	31.093	20.3111	3.38519	6.87229	0.0386758	3.1904	4.655	0.775834	1.57502	0.00205352	63.139	50.8838	8.48063	17.2166	0.383459	2.29383	3.14072	0.523454	1.06267	0.0434663	81.0754	93.7639	15.6273	31.7251	0.354842	0.575698	0.400309	0.0667181	0.135445	0.0714193	3.18861	1.86642	0.31107	0.631506	0.053564	2.0431	1.46505	0.244176
heading stage	15	63.1414	105.251	27.1757	58.2859	0.19507	35.7108	56.0526	14.4727	31.0409	0.137035	26.7433	20.9308	5.40431	11.5911	0.0326863	667.089	1377.97	355.791	763.094	0.429375	33.6831	19.6782	5.08088	10.8974	0.200178	4.3172	3.37856	0.872341	1.87098	0.0828522	19.734	25.7589	6.65092	14.2648	0.0863696	10.7723	21.1153	5.45195	11.6932	1.33638	40.3428	73.7676	19.0467	40.8511	0.70637	4.18308	4.31433	1.11395
flowering stage	39	45.9937	26.0313	4.16835	8.43837	0.141316	18.8954	16.5101	2.64373	5.35195	0.0725087	35.1028	31.9116	5.10995	10.3445	0.0441973	471.07	612.41	98.0641	198.52	0.303207	25.8041	17.6522	2.82661	5.72218	0.151152	3.87699	3.48464	0.557989	1.12959	0.0742834	23.3042	17.773	2.84596	5.76135	0.101995	2.89547	2.94393	0.471405	0.954309	0.359203	24.6297	28.7417	4.60236	9.31699	0.430287	4.37819	2.26857	0.363262
milk stage	9	66.3351	44.5751	14.8584	34.2634	0.205081	10.2112	10.3095	3.43652	7.9246	0.0391842	53.7762	68.5693	22.8564	52.7069	0.0699105	13.7767	28.2463	9.41544	21.712	0.00886742	33.3954	23.9755	7.99184	18.4292	0.198388	3.75446	1.38412	0.461375	1.06393	0.0718983	14.8854	30.5358	10.1786	23.4718	0.0651489	0.404339	0.192358	0.0641194	0.147859	0.0501611	3.28762	1.76875	0.589583	1.35958	0.0553036	4.21634	4.40352	1.46784
dough stage	18	106.942	28.9748	6.82944	14.4088	0.332374	7.12226	4.01746	0.946923	1.99783	0.0273307	29.3485	17.0392	4.01617	8.47337	0.0362737	2.13403	0.693675	0.163501	0.344956	0.00137358	23.3254	4.73933	1.11707	2.35681	0.135729	2.84556	1.22042	0.287656	0.606901	0.0542059	0.637521	0.490929	0.115713	0.244133	0.00279023	0.922687	0.298645	0.0703913	0.148512	0.114466	2.26696	1.02984	0.242735	0.512125	0.0373705	3.29692	1.53711	0.362301
mature grain stage	6	144.101	30.6414	12.5093	32.1566	0.448857	12.4183	4.00547	1.63522	4.20354	0.0476534	49.0127	10.813	4.41437	11.3477	0.0633512	3.04225	0.51807	0.211501	0.543689	0.00195816	29.2892	3.65127	1.49063	3.83183	0.172837	2.31917	1.0191	0.416046	1.0695	0.0439595	1.36919	0.629756	0.257097	0.660898	0.00599254	1.03464	0.30802	0.125749	0.323252	0.128355	2.1777	0.582867	0.237954	0.61169	0.0358021	3.92427	1.03957	0.424404
[truncated: 172 more columns]

## Sheet: USP_all_stages_raw
Gene ID	Ensembl Gene	Nomenclature	germination	seedling	tillering stage	stem elongation stage	booting stage	heading stage	flowering stage	milk stage	dough stage	mature grain stage
LOC_Os01g07590	OS01G0170600	OsUSP1	7.90575	23.0546	39.6333	48.8806	44.9512	63.1414	45.9937	66.3351	106.942	144.101
LOC_Os01g19820	OS01G0303800	OsUSP2	72.4993	24.0205	28.0283	15.513	22.2158	35.7108	18.8954	10.2112	7.12226	12.4183
LOC_Os01g32780	OS01G0511100	OsUSP3	88.1312	95.4514	35.5425	287.594	31.093	26.7433	35.1028	53.7762	29.3485	49.0127
LOC_Os01g39970	OS01G0581400	OsUSP4	0.315455	0.688998	0.606633	0.994367	3.1904	667.089	471.07	13.7767	2.13403	3.04225
LOC_Os01g57450	OS01G0783500	OsUSP5	40.999	25.8303	16.7312	60.1407	63.139	33.6831	25.8041	33.3954	23.3254	29.2892
LOC_Os01g63010	OS01G0849600	OsUSP6	23.8041	3.12021	2.91677	1.73899	2.29383	4.3172	3.87699	3.75446	2.84556	2.31917
LOC_Os01g65440	OS01G0875300	OsUSP7	21.1313	12.4782	10.1155	31.9104	81.0754	19.734	23.3042	14.8854	0.637521	1.36919
LOC_Os02g05820	OS02G0152300	OsUSP8	0.650743	0.2928	0.175448	0.948223	0.575698	10.7723	2.89547	0.404339	0.922687	1.03464
LOC_Os02g12660	OS02G0218400	OsUSP9	1.72938	2.43306	2.09991	4.48325	3.18861	40.3428	24.6297	3.28762	2.26696	2.1777
LOC_Os02g12670	OS02G0218600	OsUSP10	0.481656	3.20183	3.19765	1.13396	2.0431	4.18308	4.37819	4.21634	3.29692	3.92427
LOC_Os02g47650	OS02G0705400	OsUSP11	11.3235	36.9029	29.4932	31.4221	50.5508	26.5266	20.3842	15.9784	13.7192	16.7127
LOC_Os02g47840	OS02G0707900	OsUSP12	46.0952	51.4362	29.3717	62.8942	35.4246	33.1319	30.9438	34.3976	10.2344	10.3836
LOC_Os02g52314	OS02G0760500	OsUSP13	61.1388	44.8134	28.6488	26.9965	40.5719	26.9758	36.2664	21.7531	23.8849	41.5291
LOC_Os02g53320	OS02G0773200	OsUSP14	15.4528	16.2193	11.0075	18.41	6.17334	5.11598	9.39928	3.15298	1.07875	0.556731
LOC_Os02g54590	OS02G0787200	OsUSP15	0.28096	0.217022	0.362937	0.9007	1.79469	19.5045	9.65883	0.80192	0.308774	0.267603
LOC_Os03g13820	OS03G0241600	OsUSP16	14.0792	18.7955	14.9269	11.3209	34.0741	17.0686	13.1135	33.9405	11.0294	11.4413
LOC_Os03g19270	OS03G0305400	OsUSP17	144.971	26.6536	51.9381	25.4695	33.4551	23.7923	17.7287	1.13614	1.93097	4.2418
LOC_Os03g22390	OS03G0344166	OsUSP18	0.188805	0.305846	1.09075	0.284805	3.70674	0.360801	0.358888	0.162641	0.0821367	0
LOC_Os03g53900	OS03G0750000	OsUSP19	111.895	1.352	2.01914	3.19763	19.735	13.2976	32.1088	43.3876	0.193136	0.286627
LOC_Os03g62340	OS03G0839900	OsUSP20	19.9937	39.847	41.5594	45.5072	36.7598	30.9794	45.4705	37.0756	42.2919	45.5806
LOC_Os05g06500	OS05G0157200	OsUSP21	154.179	81.181	71.5703	201.46	138.774	125.784	111.705	172.393	194.991	278.718
LOC_Os05g07810	OS05G0170200	OsUSP22	1.57033	5.48225	3.14592	19.2624	1.92825	2.14758	0.845046	12.8967	0.797745	0.827606
LOC_Os05g28740	Os05g0355400	OsUSP23	14.3494	311.877	243.749	94.3957	76.9642	99.7918	122.421	221.564	18.6914	26.1267
LOC_Os05g35380	Os05g0428400	OsUSP24	5.65106	2.95322	1.49659	46.2527	67.527	27.7648	9.40697	15.7782	0.00509393	0
LOC_Os05g37970	Os05g0453700	OsUSP25	70.4869	27.7056	58.8837	25.7863	73.5385	61.6936	42.4288	20.6855	0.339299	0.203441
LOC_Os05g42230	Os05g0501700	OsUSP26	22.1009	14.32	10.9397	96.4873	68.8826	33.8684	32.199	30.9531	23.4888	23.8954
LOC_Os06g04880	Os06g0140800	OsUSP27	34.3116	43.9104	36.7261	25.5209	27.1258	43.5767	26.1107	36.2935	48.6545	48.0135
LOC_Os06g09230	Os06g0191900	OsUSP28	0.219957	0.722047	1.00668	1.19995	2.45842	69.1881	38.5854	1.91849	1.07805	1.08192
LOC_Os06g37620	Os06g0574200	OsUSP29	20.0404	18.6972	23.7169	20.2364	29.9279	33.6099	10.9277	8.70613	12.7164	19.0313
LOC_Os07g36600	Os07g0551400	OsUSP30	31.8964	45.1177	46.4304	66.3271	59.4499	50.1817	32.4892	19.491	17.7465	16.1319
LOC_Os07g47620	Os07g0673400	OsUSP31	3.13553	12.2308	15.8936	17.51	17.0554	5.66081	19.6577	4.43972	4.94207	7.11139
LOC_Os08g15060	Os08g0249100	OsUSP32	2.96625	7.27023	3.83387	0.547093	1.99493	2.76498	6.59349	0.71061	0.232	0.0722784
LOC_Os09g39620	Os09g0569800	OsUSP33	2.96278	4.33076	4.8467	2.73524	3.71246	22.5818	4.74011	4.90077	7.18094	15.4945
LOC_Os09g39640	Os09g0570000	OsUSP34	16.2364	10.0084	11.6806	10.8112	10.2365	16.1232	11.707	12.3665	10.5583	12.6357
LOC_Os10g01060	Os10g0100500	OsUSP35	17.6591	12.7441	15.4519	6.50928	6.80258	18.9711	4.41096	6.14088	11.9079	31.7819
LOC_Os10g30150	Os10g0437500	OsUSP36	69.3547	9.1202	14.042	9.24647	8.48213	8.30043	3.35038	0.672891	0.016323	0
LOC_Os10g32590	Os10g0463300	OsUSP37	0.00106925	0.00772169	0.0053212	0	0.012225	104.029	75.6369	1.26899	0.00452817	0
LOC_Os10g41220	Os10g0561500	OsUSP38	5.61652	2.62203	1.34928	3.5468	6.02673	5.04685	4.1264	0.904217	0.293132	0.324713
LOC_Os11g08950	Os11g0194900	OsUSP39	30.8133	29.5928	27.3267	30.5571	18.2094	22.0655	20.878	29.0616	28.4569	28.4592
LOC_Os12g07990	Os12g0180500	OsUSP40	0.447343	0.363782	0.495081	0.156442	0.258031	0.440846	0.170136	0.131643	0.10931	0.0402927
LOC_Os12g08060	Os12g0181200	OsUSP41	1.02222	0.313573	0.147365	1.34792	1.35084	1.28758	1.07348	0.502336	0.450357	0.864604
LOC_Os12g31710	Os12g0501400	OsUSP42	1.62946	0.476193	0.0742948	0.134499	0.334111	0.266123	0.282079	0.042262	0	0
LOC_Os12g36630	Os12g0552400	OsUSP43	3.54915	12.007	4.99522	9.86645	13.738	63.1554	7.13831	7.54491	5.78531	3.33094
LOC_Os12g36640	Os12g0552500	OsUSP44	110.103	217.844	157.784	255.842	311.357	193.245	288.613	248.56	206.524	283.211

## Sheet: log10_trans
Nomenclature	germination	Germination	seedling	Seedling	tillering stage	Tillering stage	stem elongation stage	Stem elongation stage	booting stage	Booting stage	heading stage	Heading stage	flowering stage	Flowering stage	mature grain stage	Mature grain stage
OsUSP1	7.90575	0.897943	23.0546	1.36276	39.6333	1.59806	48.8806	1.68914	44.9512	1.65274	63.1414	1.80031	45.9937	1.6627	144.101	2.15867
OsUSP2	72.4993	1.86033	24.0205	1.38058	28.0283	1.4476	15.513	1.1907	22.2158	1.34666	35.7108	1.5528	18.8954	1.27636	12.4183	1.09406
OsUSP3	88.1312	1.94513	95.4514	1.97978	35.5425	1.55075	287.594	2.45878	31.093	1.49266	26.7433	1.42721	35.1028	1.54534	49.0127	1.69031
OsUSP4	0.315455	-0.501063	0.688998	-0.161782	0.606633	-0.217074	0.994367	-0.00245314	3.1904	0.503846	667.089	2.82418	471.07	2.67309	3.04225	0.483195
OsUSP5	40.999	1.61277	25.8303	1.41213	16.7312	1.22353	60.1407	1.77917	63.139	1.8003	33.6831	1.52741	25.8041	1.41169	29.2892	1.46671
OsUSP6	23.8041	1.37665	3.12021	0.494184	2.91677	0.464902	1.73899	0.240297	2.29383	0.360562	4.3172	0.635202	3.87699	0.588495	2.31917	0.365333
OsUSP7	21.1313	1.32493	12.4782	1.09615	10.1155	1.00499	31.9104	1.50393	81.0754	1.90889	19.734	1.29522	23.3042	1.36743	1.36919	0.136465
OsUSP8	0.650743	-0.18659	0.2928	-0.533428	0.175448	-0.755851	0.948223	-0.0230897	0.575698	-0.239805	10.7723	1.03231	2.89547	0.461719	1.03464	0.0147906
OsUSP9	1.72938	0.237891	2.43306	0.386153	2.09991	0.322201	4.48325	0.651593	3.18861	0.503602	40.3428	1.60577	24.6297	1.39146	2.1777	0.337998
OsUSP10	0.481656	-0.317263	3.20183	0.505398	3.19765	0.504831	1.13396	0.054596	2.0431	0.310289	4.18308	0.621497	4.37819	0.641294	3.92427	0.593759
OsUSP11	11.3235	1.05398	36.9029	1.56706	29.4932	1.46972	31.4221	1.49723	50.5508	1.70373	26.5266	1.42368	20.3842	1.30929	16.7127	1.22305
OsUSP12	46.0952	1.66366	51.4362	1.71127	29.3717	1.46793	62.8942	1.79861	35.4246	1.5493	33.1319	1.52025	30.9438	1.49057	10.3836	1.01635
OsUSP13	61.1388	1.78632	44.8134	1.65141	28.6488	1.45711	26.9965	1.43131	40.5719	1.60823	26.9758	1.43097	36.2664	1.5595	41.5291	1.61835
OsUSP14	15.4528	1.18901	16.2193	1.21003	11.0075	1.04169	18.41	1.26505	6.17334	0.79052	5.11598	0.708929	9.39928	0.973094	0.556731	-0.254354
OsUSP15	0.28096	-0.551356	0.217022	-0.663497	0.362937	-0.440169	0.9007	-0.0454198	1.79469	0.25399	19.5045	1.29013	9.65883	0.984924	0.267603	-0.57251
OsUSP16	14.0792	1.14858	18.7955	1.27405	14.9269	1.17397	11.3209	1.05388	34.0741	1.53242	17.0686	1.2322	13.1135	1.11772	11.4413	1.05847
OsUSP17	144.971	2.16128	26.6536	1.42576	51.9381	1.71549	25.4695	1.40602	33.4551	1.52446	23.7923	1.37644	17.7287	1.24868	4.2418	0.627551
OsUSP18	0.188805	-0.723988	0.305846	-0.514497	1.09075	0.0377238	0.284805	-0.545452	3.70674	0.568992	0.360801	-0.442732	0.358888	-0.445041	0	#NUM!
OsUSP19	111.895	2.04881	1.352	0.130975	2.01914	0.305166	3.19763	0.504828	19.735	1.29524	13.2976	1.12377	32.1088	1.50662	0.286627	-0.542683
OsUSP20	19.9937	1.30089	39.847	1.6004	41.5594	1.61867	45.5072	1.65808	36.7598	1.56537	30.9794	1.49107	45.4705	1.65773	45.5806	1.65878
OsUSP21	154.179	2.18802	81.181	1.90945	71.5703	1.85473	201.46	2.30419	138.774	2.14231	125.784	2.09962	111.705	2.04807	278.718	2.44516
OsUSP22	1.57033	0.195991	5.48225	0.738959	3.14592	0.497748	19.2624	1.28471	1.92825	0.285164	2.14758	0.331948	0.845046	-0.0731198	0.827606	-0.0821763
OsUSP23	14.3494	1.15683	311.877	2.49398	243.749	2.38694	94.3957	1.97495	76.9642	1.88629	99.7918	1.99909	122.421	2.08786	26.1267	1.41708
OsUSP24	5.65106	0.75213	2.95322	0.470296	1.49659	0.175103	46.2527	1.66514	67.527	1.82948	27.7648	1.44349	9.40697	0.97345	0	#NUM!
OsUSP25	70.4869	1.84811	27.7056	1.44257	58.8837	1.77	25.7863	1.41139	73.5385	1.86651	61.6936	1.79024	42.4288	1.62766	0.203441	-0.691561
OsUSP26	22.1009	1.34441	14.32	1.15594	10.9397	1.03901	96.4873	1.98447	68.8826	1.83811	33.8684	1.52979	32.199	1.50784	23.8954	1.37831
OsUSP27	34.3116	1.53544	43.9104	1.64257	36.7261	1.56498	25.5209	1.4069	27.1258	1.43338	43.5767	1.63925	26.1107	1.41682	48.0135	1.68136
OsUSP28	0.219957	-0.657662	0.722047	-0.141434	1.00668	0.00289006	1.19995	0.0791633	2.45842	0.390655	69.1881	1.84003	38.5854	1.58642	1.08192	0.0341934
OsUSP29	20.0404	1.30191	18.6972	1.27178	23.7169	1.37506	20.2364	1.30613	29.9279	1.47608	33.6099	1.52647	10.9277	1.03853	19.0313	1.27947
OsUSP30	31.8964	1.50374	45.1177	1.65435	46.4304	1.6668	66.3271	1.82169	59.4499	1.77415	50.1817	1.70055	32.4892	1.51174	16.1319	1.20768
OsUSP31	3.13553	0.496312	12.2308	1.08745	15.8936	1.20122	17.51	1.24329	17.0554	1.23186	5.66081	0.752879	19.6577	1.29353	7.11139	0.851954
OsUSP32	2.96625	0.472208	7.27023	0.861548	3.83387	0.583637	0.547093	-0.261939	1.99493	0.299928	2.76498	0.441692	6.59349	0.819116	0.0722784	-1.14099
OsUSP33	2.96278	0.4717	4.33076	0.636564	4.8467	0.685446	2.73524	0.436996	3.71246	0.569662	22.5818	1.35376	4.74011	0.675789	15.4945	1.19018
OsUSP34	16.2364	1.21049	10.0084	1.00036	11.6806	1.06746	10.8112	1.03388	10.2365	1.01015	16.1232	1.20745	11.707	1.06844	12.6357	1.1016
OsUSP35	17.6591	1.24697	12.7441	1.10531	15.4519	1.18898	6.50928	0.813533	6.80258	0.832674	18.9711	1.27809	4.41096	0.644533	31.7819	1.50218
OsUSP36	69.3547	1.84108	9.1202	0.960004	14.042	1.14743	9.24647	0.965976	8.48213	0.928505	8.30043	0.9191	3.35038	0.525094	0	#NUM!
OsUSP37	0.00106925	-2.97092	0.00772169	-2.11229	0.0053212	-2.27399	0	#NUM!	0.012225	-1.91275	104.029	2.01715	75.6369	1.87873	0	#NUM!
OsUSP38	5.61652	0.749467	2.62203	0.418638	1.34928	0.130101	3.5468	0.549837	6.02673	0.780082	5.04685	0.703021	4.1264	0.615571	0.324713	-0.4885
OsUSP39	30.8133	1.48874	29.5928	1.47119	27.3267	1.43659	30.5571	1.48511	18.2094	1.2603	22.0655	1.34371	20.878	1.31969	28.4592	1.45422
OsUSP40	0.447343	-0.34936	0.363782	-0.439158	0.495081	-0.305324	0.156442	-0.805646	0.258031	-0.588328	0.440846	-0.355713	0.170136	-0.769203	0.0402927	-1.39477
OsUSP41	1.02222	0.00954256	0.313573	-0.503661	0.147365	-0.831607	1.34792	0.129663	1.35084	0.130603	1.28758	0.109774	1.07348	0.0307926	0.864604	-0.063183
OsUSP42	1.62946	0.212043	0.476193	-0.322217	0.0742948	-1.12904	0.134499	-0.87128	0.334111	-0.476109	0.266123	-0.574917	0.282079	-0.549629	0	#NUM!
OsUSP43	3.54915	0.550125	12.007	1.07944	4.99522	0.698554	9.86645	0.994161	13.738	1.13792	63.1554	1.80041	7.13831	0.853595	3.33094	0.522566
OsUSP44	110.103	2.0418	217.844	2.33815	157.784	2.19806	255.842	2.40797	311.357	2.49326	193.245	2.28611	288.613	2.46032	283.211	2.45211

## Sheet: sorted_final
Nomenclature	Germination	Seedling	Tillering stage	Stem elongation stage	Booting stage	Heading stage	Flowering stage	Mature grain stage
OsUSP1	0.897943	1.36276	1.59806	1.68914	1.65274	1.80031	1.6627	2.15867
OsUSP2	1.86033	1.38058	1.4476	1.1907	1.34666	1.5528	1.27636	1.09406
OsUSP3	1.94513	1.97978	1.55075	2.45878	1.49266	1.42721	1.54534	1.69031
OsUSP4	-0.501063	-0.161782	-0.217074	-0.00245314	0.503846	2.82418	2.67309	0.483195
OsUSP5	1.61277	1.41213	1.22353	1.77917	1.8003	1.52741	1.41169	1.46671
OsUSP6	1.37665	0.494184	0.464902	0.240297	0.360562	0.635202	0.588495	0.365333
OsUSP7	1.32493	1.09615	1.00499	1.50393	1.90889	1.29522	1.36743	0.136465
OsUSP8	-0.18659	-0.533428	-0.755851	-0.0230897	-0.239805	1.03231	0.461719	0.0147906
OsUSP9	0.237891	0.386153	0.322201	0.651593	0.503602	1.60577	1.39146	0.337998
OsUSP10	-0.317263	0.505398	0.504831	0.054596	0.310289	0.621497	0.641294	0.593759
OsUSP11	1.05398	1.56706	1.46972	1.49723	1.70373	1.42368	1.30929	1.22305
OsUSP12	1.66366	1.71127	1.46793	1.79861	1.5493	1.52025	1.49057	1.01635
OsUSP13	1.78632	1.65141	1.45711	1.43131	1.60823	1.43097	1.5595	1.61835
OsUSP14	1.18901	1.21003	1.04169	1.26505	0.79052	0.708929	0.973094	-0.254354
OsUSP15	-0.551356	-0.663497	-0.440169	-0.0454198	0.25399	1.29013	0.984924	-0.57251
OsUSP16	1.14858	1.27405	1.17397	1.05388	1.53242	1.2322	1.11772	1.05847
OsUSP17	2.16128	1.42576	1.71549	1.40602	1.52446	1.37644	1.24868	0.627551
OsUSP18	-0.723988	-0.514497	0.0377238	-0.545452	0.568992	-0.442732	-0.445041	0
OsUSP19	2.04881	0.130975	0.305166	0.504828	1.29524	1.12377	1.50662	-0.542683
OsUSP20	1.30089	1.6004	1.61867	1.65808	1.56537	1.49107	1.65773	1.65878
OsUSP21	2.18802	1.90945	1.85473	2.30419	2.14231	2.09962	2.04807	2.44516
OsUSP22	0.195991	0.738959	0.497748	1.28471	0.285164	0.331948	-0.0731198	-0.0821763
OsUSP23	1.15683	2.49398	2.38694	1.97495	1.88629	1.99909	2.08786	1.41708
OsUSP24	0.75213	0.470296	0.175103	1.66514	1.82948	1.44349	0.97345	0
OsUSP25	1.84811	1.44257	1.77	1.41139	1.86651	1.79024	1.62766	-0.691561
OsUSP26	1.34441	1.15594	1.03901	1.98447	1.83811	1.52979	1.50784	1.37831
OsUSP27	1.53544	1.64257	1.56498	1.4069	1.43338	1.63925	1.41682	1.68136
OsUSP28	-0.657662	-0.141434	0.00289006	0.0791633	0.390655	1.84003	1.58642	0.0341934
OsUSP29	1.30191	1.27178	1.37506	1.30613	1.47608	1.52647	1.03853	1.27947
OsUSP30	1.50374	1.65435	1.6668	1.82169	1.77415	1.70055	1.51174	1.20768
OsUSP31	0.496312	1.08745	1.20122	1.24329	1.23186	0.752879	1.29353	0.851954
OsUSP32	0.472208	0.861548	0.583637	-0.261939	0.299928	0.441692	0.819116	-1.14099
OsUSP33	0.4717	0.636564	0.685446	0.436996	0.569662	1.35376	0.675789	1.19018
OsUSP34	1.21049	1.00036	1.06746	1.03388	1.01015	1.20745	1.06844	1.1016
OsUSP35	1.24697	1.10531	1.18898	0.813533	0.832674	1.27809	0.644533	1.50218
OsUSP36	1.84108	0.960004	1.14743	0.965976	0.928505	0.9191	0.525094	0
OsUSP37	-2.97092	-2.11229	-2.27399	0	-1.91275	2.01715	1.87873	0
OsUSP38	0.749467	0.418638	0.130101	0.549837	0.780082	0.703021	0.615571	-0.4885
OsUSP39	1.48874	1.47119	1.43659	1.48511	1.2603	1.34371	1.31969	1.45422
OsUSP40	-0.34936	-0.439158	-0.305324	-0.805646	-0.588328	-0.355713	-0.769203	-1.39477
OsUSP41	0.00954256	-0.503661	-0.831607	0.129663	0.130603	0.109774	0.0307926	-0.063183
OsUSP42	0.212043	-0.322217	-1.12904	-0.87128	-0.476109	-0.574917	-0.549629	0
OsUSP43	0.550125	1.07944	0.698554	0.994161	1.13792	1.80041	0.853595	0.522566
OsUSP44	2.0418	2.33815	2.19806	2.40797	2.49326	2.28611	2.46032	2.45211
