# Supplementary material for: Comprehensive in silico Characterization of Universal Stress Proteins in Rice (Oryza sativa L.) With Insight Into Their Stress-Specific Transcriptional Modulation
Source: Front Plant Sci. 2021 Jul 28;12:712607. doi: 10.3389/fpls.2021.712607 (PMC8355530; doi:10.3389/fpls.2021.712607)
Supplement: Supplementary file 5 [file Table_3.xlsx]

## Sheet: Genevestigator data export
					Ensembl Gene	OS01G0170600	OS01G0170600	OS01G0170600	OS01G0170600	OS01G0303800	OS01G0303800	OS01G0303800	OS01G0303800	OS01G0511100	OS01G0511100	OS01G0511100	OS01G0511100	OS01G0581400	OS01G0581400	OS01G0581400	OS01G0581400	OS01G0783500	OS01G0783500	OS01G0783500	OS01G0783500	OS01G0849600	OS01G0849600	OS01G0849600	OS01G0849600	OS01G0875300	OS01G0875300	OS01G0875300	OS01G0875300	OS02G0152300	OS02G0152300	OS02G0152300	OS02G0152300	OS02G0218400	OS02G0218400	OS02G0218400	OS02G0218400	OS02G0218600	OS02G0218600	OS02G0218600	OS02G0218600	OS02G0705400	OS02G0705400	OS02G0705400	OS02G0705400
					MSU Locus	LOC_Os01g07590	LOC_Os01g07590	LOC_Os01g07590	LOC_Os01g07590	LOC_Os01g19820	LOC_Os01g19820	LOC_Os01g19820	LOC_Os01g19820	LOC_Os01g32780	LOC_Os01g32780	LOC_Os01g32780	LOC_Os01g32780	LOC_Os01g39970	LOC_Os01g39970	LOC_Os01g39970	LOC_Os01g39970	LOC_Os01g57450	LOC_Os01g57450	LOC_Os01g57450	LOC_Os01g57450	LOC_Os01g63010	LOC_Os01g63010	LOC_Os01g63010	LOC_Os01g63010	LOC_Os01g65440	LOC_Os01g65440	LOC_Os01g65440	LOC_Os01g65440	LOC_Os02g05820	LOC_Os02g05820	LOC_Os02g05820	LOC_Os02g05820	LOC_Os02g12660	LOC_Os02g12660	LOC_Os02g12660	LOC_Os02g12660	LOC_Os02g12670	LOC_Os02g12670	LOC_Os02g12670	LOC_Os02g12670	LOC_Os02g47650	LOC_Os02g47650	LOC_Os02g47650	LOC_Os02g47650
					MSU Transcript	LOC_Os01g07590.1	LOC_Os01g07590.1	LOC_Os01g07590.1	LOC_Os01g07590.1	LOC_Os01g19820.1,LOC_Os01g19820.2,LOC_Os01g19820.3,LOC_Os01g19820.4	LOC_Os01g19820.1,LOC_Os01g19820.2,LOC_Os01g19820.3,LOC_Os01g19820.4	LOC_Os01g19820.1,LOC_Os01g19820.2,LOC_Os01g19820.3,LOC_Os01g19820.4	LOC_Os01g19820.1,LOC_Os01g19820.2,LOC_Os01g19820.3,LOC_Os01g19820.4	LOC_Os01g32780.1	LOC_Os01g32780.1	LOC_Os01g32780.1	LOC_Os01g32780.1	LOC_Os01g39970.1	LOC_Os01g39970.1	LOC_Os01g39970.1	LOC_Os01g39970.1	LOC_Os01g57450.1	LOC_Os01g57450.1	LOC_Os01g57450.1	LOC_Os01g57450.1	LOC_Os01g63010.1	LOC_Os01g63010.1	LOC_Os01g63010.1	LOC_Os01g63010.1	LOC_Os01g65440.1	LOC_Os01g65440.1	LOC_Os01g65440.1	LOC_Os01g65440.1	LOC_Os02g05820.1	LOC_Os02g05820.1	LOC_Os02g05820.1	LOC_Os02g05820.1	LOC_Os02g12660.1	LOC_Os02g12660.1	LOC_Os02g12660.1	LOC_Os02g12660.1	LOC_Os02g12670.1	LOC_Os02g12670.1	LOC_Os02g12670.1	LOC_Os02g12670.1	LOC_Os02g47650.1	LOC_Os02g47650.1	LOC_Os02g47650.1	LOC_Os02g47650.1
					Gene	LOC_Os01g07590	LOC_Os01g07590	LOC_Os01g07590	LOC_Os01g07590	LOC_Os01g19820	LOC_Os01g19820	LOC_Os01g19820	LOC_Os01g19820	LOC_Os01g32780	LOC_Os01g32780	LOC_Os01g32780	LOC_Os01g32780	LOC_Os01g39970	LOC_Os01g39970	LOC_Os01g39970	LOC_Os01g39970	LOC_Os01g57450	LOC_Os01g57450	LOC_Os01g57450	LOC_Os01g57450	LOC_Os01g63010	LOC_Os01g63010	LOC_Os01g63010	LOC_Os01g63010	LOC_Os01g65440	LOC_Os01g65440	LOC_Os01g65440	LOC_Os01g65440	LOC_Os02g05820	LOC_Os02g05820	LOC_Os02g05820	LOC_Os02g05820	LOC_Os02g12660	LOC_Os02g12660	LOC_Os02g12660	LOC_Os02g12660	LOC_Os02g12670	LOC_Os02g12670	LOC_Os02g12670	LOC_Os02g12670	LOC_Os02g47650	LOC_Os02g47650	LOC_Os02g47650	LOC_Os02g47650
					Measure	LOC_Os01g07590	LOC_Os01g07590	LOC_Os01g07590	LOC_Os01g07590	LOC_Os01g19820	LOC_Os01g19820	LOC_Os01g19820	LOC_Os01g19820	LOC_Os01g32780	LOC_Os01g32780	LOC_Os01g32780	LOC_Os01g32780	LOC_Os01g39970	LOC_Os01g39970	LOC_Os01g39970	LOC_Os01g39970	LOC_Os01g57450	LOC_Os01g57450	LOC_Os01g57450	LOC_Os01g57450	LOC_Os01g63010	LOC_Os01g63010	LOC_Os01g63010	LOC_Os01g63010	LOC_Os01g65440	LOC_Os01g65440	LOC_Os01g65440	LOC_Os01g65440	LOC_Os02g05820	LOC_Os02g05820	LOC_Os02g05820	LOC_Os02g05820	LOC_Os02g12660	LOC_Os02g12660	LOC_Os02g12660	LOC_Os02g12660	LOC_Os02g12670	LOC_Os02g12670	LOC_Os02g12670	LOC_Os02g12670	LOC_Os02g47650	LOC_Os02g47650	LOC_Os02g47650	LOC_Os02g47650
Path from root	Perturbations	Experiment	Experiment Title	# samples experiment	# samples control	Log2-ratio	Fold-Change	p-value	Pi-score	Log2-ratio	Fold-Change	p-value	Pi-score	Log2-ratio	Fold-Change	p-value	Pi-score	Log2-ratio	Fold-Change	p-value	Pi-score	Log2-ratio	Fold-Change	p-value	Pi-score	Log2-ratio	Fold-Change	p-value	Pi-score	Log2-ratio	Fold-Change	p-value	Pi-score	Log2-ratio	Fold-Change	p-value	Pi-score	Log2-ratio	Fold-Change	p-value	Pi-score	Log2-ratio	Fold-Change	p-value	Pi-score	Log2-ratio	Fold-Change	p-value	Pi-score
rehydration (Azucena; 240min) > Stress	rehydration (Azucena; 240min) / dehydration (Azucena; 90min)	OS-00144	GSE74793: Rice gene expression in heat stress and dehydration stress - time series	2	2	1.18162	2.28703	0.0216893	1.96593	0.988568	2.0971	0.383616	0.411347	-1.27067	-3.00626	0.348673	0.581433	-0.252143	-1.17539	0.354171	0.113663	-0.662205	-1.69896	0.245753	0.403614	0.1811	1.13483	0.354018	0.0816716	0.127516	1.14328	0.748821	0.0160188	0.0615463	1.04251	0.760385	0.00732196	-0.197936	-1.15996	0.415202	0.0755602	-0.0889578	-1.06023	0.681745	0.0148006	-1.0047	-2.32652	0.233982	0.633784
rehydration (Azucena; 180min) > Stress	rehydration (Azucena; 180min) / dehydration (Azucena; 90min)	OS-00144	GSE74793: Rice gene expression in heat stress and dehydration stress - time series	2	2	0.837903	1.81774	0.0620017	1.01185	0.999547	1.74347	0.23999	0.619526	0.878629	1.32706	0.444044	0.309782	-0.296642	-1.22661	0.153806	0.241177	0.480794	1.37857	0.463274	0.160663	0.259253	1.21906	0.38714	0.106847	-0.00575113	1.01037	0.98202	4.53177e-05	0.261015	1.1979	0.283943	0.142715	-0.0619123	-1.04663	0.812972	0.00556741	-0.208343	-1.15291	0.364388	0.0913451	-0.300243	-1.41237	0.67136	0.0519554
rehydration (Azucena; 210min) > Stress	rehydration (Azucena; 210min) / dehydration (Azucena; 90min)	OS-00144	GSE74793: Rice gene expression in heat stress and dehydration stress - time series	2	2	0.734607	1.66424	0.0334739	1.08376	1.34648	2.18846	0.14717	1.12052	0.0593023	-1.31176	0.955643	0.00116851	-0.31576	-1.23913	0.20194	0.219383	-0.345112	-1.3553	0.502379	0.103178	-0.159728	-1.11695	0.440542	0.0568653	0.258584	1.22681	0.459963	0.0872147	0.113925	1.08173	0.601731	0.0251317	-0.164268	-1.13335	0.501447	0.0492435	-0.454412	-1.37769	0.0831035	0.490938	-0.419002	-1.55425	0.552296	0.10803
rehydration (Azucena; 270min) > Stress	rehydration (Azucena; 270min) / dehydration (Azucena; 90min)	OS-00144	GSE74793: Rice gene expression in heat stress and dehydration stress - time series	2	2	0.576354	1.50388	0.0889772	0.605588	-0.240222	-1.35559	0.730936	0.0326991	-1.2771	-3.27904	0.313305	0.643702	-0.313648	-1.2407	0.159366	0.250167	-1.07361	-2.25972	0.120419	0.986978	-0.419566	-1.33348	0.134651	0.365354	-0.22385	-1.13924	0.507329	0.065971	0.192212	1.14125	0.398111	0.076884	-0.344681	-1.27187	0.288015	0.186329	-0.719865	-1.63235	0.0824375	0.780244	-1.30408	-2.80249	0.176094	0.983612
heat recovery (Azucena; 240min) > Stress	heat recovery (Azucena; 240min) / heat (Azucena; 120min)	OS-00144	GSE74793: Rice gene expression in heat stress and dehydration stress - time series	2	2	0.617576	1.46587	0.230115	0.394048	-0.886378	-1.90969	0.122813	0.807273	-0.733572	-1.41221	0.399927	0.291976	0.0752622	1.05112	0.740734	0.00980952	-0.292799	-1.22728	0.308554	0.149523	-0.328604	-1.25383	0.285766	0.178757	-0.109034	-1.08685	0.690961	0.0175049	-0.0435731	-1.03123	0.776972	0.00477537	-0.39571	-1.30727	0.162858	0.311895	-0.192777	-1.15107	0.474065	0.062491	0.345782	1.2002	0.506398	0.102181
rehydration (Azucena; 165min) > Stress	rehydration (Azucena; 165min) / dehydration (Azucena; 90min)	OS-00144	GSE74793: Rice gene expression in heat stress and dehydration stress - time series	2	2	0.492447	1.40693	0.070551	0.567051	0.945257	1.6581	0.247345	0.573484	0.279222	-1.01582	0.81657	0.0245734	-0.226422	-1.16352	0.323049	0.111112	0.264521	1.12675	0.595182	0.05961	0.140697	1.10839	0.534908	0.0382304	-0.849076	-1.79362	0.0573183	1.0543	0.154525	1.11197	0.490663	0.0477818	-0.227603	-1.17922	0.410577	0.0879925	-0.323274	-1.24314	0.26103	0.188569	-0.0892134	-1.21532	0.898689	0.00413867
rehydration (Azucena; 105min) > Stress	rehydration (Azucena; 105min) / dehydration (Azucena; 90min)	OS-00144	GSE74793: Rice gene expression in heat stress and dehydration stress - time series	2	2	0.392718	1.31366	0.104625	0.385007	0.796116	2.15525	0.543118	0.211055	-0.723636	-1.09064	0.70986	0.107697	-0.0169706	1.00342	0.946723	0.000403515	-0.0680017	1.01003	0.92794	0.0022087	0.251659	1.20583	0.370527	0.10851	-0.125467	1.00118	0.812557	0.0113104	0.0820201	1.05895	0.699686	0.012721	-0.224284	-1.1783	0.39579	0.0902821	-0.762284	-1.69958	0.0419694	1.04972	-0.367107	-1.32991	0.684108	0.060527
heat recovery (Azucena; 165min) > Stress	heat recovery (Azucena; 165min) / heat (Azucena; 120min)	OS-00144	GSE74793: Rice gene expression in heat stress and dehydration stress - time series	2	2	0.416413	1.27323	0.365378	0.18208	-0.59258	-1.5538	0.228636	0.379759	0.284841	1.7116	0.793985	0.0285376	-0.0119534	-1.01413	0.952684	0.000251631	-0.118074	-1.08249	0.66138	0.0212001	-0.0350714	1.00807	0.927174	0.00115171	0.0793743	1.04828	0.765123	0.00922877	-0.15274	-1.11351	0.328491	0.073846	-0.350571	-1.27518	0.129869	0.310779	-0.225507	-1.17901	0.402231	0.0891934	0.378742	1.31238	0.575315	0.0909337
drought (13d) > Stress	drought (13d) / untreated leaf samples (13d)	OS-00369	SRP067728: Oryza sativa gene expression under drought stress	3	2	0.371339	1.25941	0.196349	0.262526	0.561709	1.38349	0.21664	0.373121	0.89272	1.81037	0.0231496	1.46	-0.0333681	-1.01543	0.813317	0.00299446	-0.0687768	-1.04977	0.759634	0.00821164	0.690307	1.5508	0.07458	0.778237	0.164499	1.139	0.426913	0.0608088	0.00694343	1.00428	0.952037	0.000148215	0.148329	1.1102	0.135706	0.128661	-0.0767864	-1.05474	0.335517	0.0364187	0.257411	1.23744	0.466697	0.0851941
heat (Azucena; 105min) > Stress	heat (Azucena; 105min) / untreated leaf samples (Azucena; 105min)	OS-00144	GSE74793: Rice gene expression in heat stress and dehydration stress - time series	2	2	0.330532	1.24088	0.387574	0.136062	-2.02851	-4.32032	0.136702	1.75309	0.0965014	1.1467	0.91497	0.0037243	0.0669465	1.06539	0.816648	0.00588895	-0.131516	-1.10216	0.636848	0.0257725	0.242775	1.20991	0.617081	0.0508998	0.423404	1.20861	0.516181	0.121601	-0.0714266	-1.05954	0.742661	0.00922898	0.260603	1.18877	0.296979	0.137409	0.0454502	1.03383	0.758893	0.00544581	-0.503273	-1.34221	0.337961	0.237109
dehydration (Azucena; 45min) > Stress	dehydration (Azucena; 45min) / untreated leaf samples (Azucena; 45min)	OS-00144	GSE74793: Rice gene expression in heat stress and dehydration stress - time series	2	2	0.298858	1.2161	0.472493	0.0973094	0.0209076	1.01903	0.972835	0.000250071	0.541897	1.501	0.228671	0.347241	-0.12232	-1.09018	0.569019	0.0299529	-0.0524457	-1.0345	0.882319	0.0028517	0.428255	1.3171	0.355305	0.192457	0.598629	1.52018	0.13301	0.524468	-0.26443	-1.21259	0.386848	0.109067	0.139518	1.10175	0.416155	0.0531208	-0.0126524	-1.01216	0.931016	0.000392764	0.2236	1.35763	0.746741	0.0283592
heat recovery (Azucena; 135min) > Stress	heat recovery (Azucena; 135min) / heat (Azucena; 120min)	OS-00144	GSE74793: Rice gene expression in heat stress and dehydration stress - time series	2	2	0.331087	1.20014	0.453828	0.113599	-0.927748	-1.95517	0.121613	0.848908	-0.860688	-1.79099	0.15056	0.707736	0.384672	1.30403	0.202773	0.266573	-0.521258	-1.39139	0.267174	0.298788	-0.190906	-1.14457	0.450132	0.0661795	0.0582609	1.10107	0.905722	0.00250552	0.0241569	1.0154	0.872134	0.00143532	-0.191197	-1.14016	0.328497	0.0924376	0.120603	1.07677	0.616201	0.0253601	-0.0388889	-1.06664	0.942954	0.000992036
rehydration (Azucena; 300min) > Stress	rehydration (Azucena; 300min) / dehydration (Azucena; 90min)	OS-00144	GSE74793: Rice gene expression in heat stress and dehydration stress - time series	2	2	0.208622	1.17797	0.480201	0.0664623	-0.900232	-2.16569	0.268086	0.514686	-2.82922	-9.41639	0.101984	2.80508	-0.08839	-1.06401	0.571177	0.021499	-1.66963	-3.22576	0.091676	1.73264	-0.480774	-1.39537	0.0920811	0.498	0.639519	1.56492	0.0701703	0.737907	0.168512	1.12341	0.455372	0.0575693	-0.169279	-1.13498	0.497076	0.0513893	-0.78677	-1.73453	0.0295279	1.20357	-1.06631	-2.41772	0.219973	0.701236
heat recovery (Azucena; 225min) > Stress	heat recovery (Azucena; 225min) / heat (Azucena; 120min)	OS-00144	GSE74793: Rice gene expression in heat stress and dehydration stress - time series	2	2	0.28584	1.17783	0.546456	0.0750172	-0.547771	-1.02799	0.64271	0.105164	-0.37702	-1.26901	0.448071	0.131449	-0.0561188	-1.03309	0.836293	0.00435714	-0.840098	-1.78896	0.0776599	0.932343	0.00722933	1.00263	0.975833	7.68088e-05	0.227152	1.16781	0.473457	0.0737608	-0.239517	-1.18279	0.483402	0.0756133	-0.164443	-1.12082	0.370835	0.0708453	-0.417005	-1.34463	0.203553	0.288285	-0.409873	-1.38398	0.487182	0.128007
salt (1h) > Stress	salt (1h) / untreated shoot samples (1h)	OS-00148	E-MTAB-1625: RNA-seq of coding RNA in rice (Oryza sativa L. japonica Nipponbare) under salt stress over a time-course, Gramene project	3	3	0.195609	1.1508	0.126543	0.17561	0.345338	1.25547	0.0321268	0.515636	-0.295172	-1.3498	0.370687	0.127217	0.00237262	1.00285	0.983024	1.76429e-05	-0.292817	-1.23242	0.0462078	0.390994	0.314412	1.2391	0.0242895	0.507644	0.197845	1.04457	0.592549	0.0449653	0.0119211	1.00929	0.809535	0.00109393	-0.219853	-1.15844	0.0743169	0.248195	-0.0276179	-1.03443	0.858533	0.0018295	-0.222939	-1.27011	0.438473	0.0798248
salt (24h) > Stress	salt (24h) / untreated shoot samples (24h)	OS-00148	E-MTAB-1625: RNA-seq of coding RNA in rice (Oryza sativa L. japonica Nipponbare) under salt stress over a time-course, Gramene project	3	3	0.148538	1.1127	0.0704756	0.17111	-0.610714	-1.46823	0.0230501	0.999939	1.59028	3.14998	0.000865982	4.87021	-0.133818	-1.09527	0.190042	0.096503	0.837825	1.843	0.00622092	1.84836	0.109108	1.06915	0.36148	0.0482165	0.436182	1.4072	0.248523	0.26373	-0.0657714	-1.04594	0.203222	0.0455157	0.0084939	1.00775	0.940096	0.000227873	-0.0855961	-1.05182	0.679557	0.0143608	0.636474	1.59079	0.0119257	1.22427
dehydration (Azucena; 30min) > Stress	dehydration (Azucena; 30min) / untreated leaf samples (Azucena; 30min)	OS-00144	GSE74793: Rice gene expression in heat stress and dehydration stress - time series	2	2	0.192517	1.09561	0.681302	0.0320849	-0.206573	-1.14974	0.574009	0.0498009	-0.268434	-1.20227	0.470327	0.0879388	0.0780043	1.04771	0.731834	0.0105764	0.130744	1.10148	0.690212	0.021052	0.382731	1.30472	0.20855	0.260559	0.0959034	1.18485	0.879531	0.00534652	0.498928	1.48538	0.407336	0.194606	0.623915	1.47916	0.266174	0.358647	-0.45097	-1.36482	0.202693	0.312595	0.676133	1.68508	0.245784	0.412068
drought (3d) > Stress	drought (3d) / untreated root samples	OS-00230	GSE92989: An RNA-Seq transcriptome analysis of rice genes in response to soil-water deficiencies and the identification of OsPhyB-mediating novel regulatory pathway for drought tolerance in root	2	2	0.0999327	1.08697	0.698495	0.0155732	-1.83856	-3.5235	0.0113082	3.57896	6.18379	73.3467	0.000761176	19.2842	0	1	1	0	2.13967	4.40778	0.00117901	6.26599	0.197684	1.14744	0.236886	0.123643	-2.2066	-4.7655	0.0220226	3.65663	-0.25561	-1.19016	0.216766	0.169728	1.10093	2.14813	0.00980543	2.21125	-0.45735	-1.37682	0.0584687	0.563947	0.786579	1.67409	0.24346	0.482623
heat (Azucena; 120min) > Stress	heat (Azucena; 120min) / untreated leaf samples (Azucena; 120min)	OS-00144	GSE74793: Rice gene expression in heat stress and dehydration stress - time series	2	2	0.277573	1.07925	0.73219	0.0375767	-0.493323	-1.44206	0.419926	0.185898	1.18072	2.29237	0.0630898	1.41692	-0.163851	-1.11429	0.511306	0.0477328	1.07757	2.10748	0.0689639	1.25147	0.447501	1.31153	0.359353	0.198905	0.476228	1.38996	0.266932	0.273164	-0.079389	-1.06819	0.762097	0.00936707	0.852355	1.79716	0.0491589	1.11522	0.0594137	1.05151	0.813619	0.0053222	0.188177	1.14721	0.776407	0.0206826
heat (Azucena; 30min) > Stress	heat (Azucena; 30min) / untreated leaf samples (Azucena; 30min)	OS-00144	GSE74793: Rice gene expression in heat stress and dehydration stress - time series	2	2	0.147917	1.06199	0.747774	0.0186716	-1.32572	-1.99009	0.23333	0.837895	0.191435	1.12128	0.474843	0.0619196	0.179006	1.12589	0.474654	0.0579304	0.310845	1.24902	0.377571	0.131488	-0.475924	-1.36824	0.231321	0.302585	-0.778697	-1.73226	0.0994364	0.780608	0.0715811	1.04827	0.853216	0.00493489	0.0642727	-1.00552	0.882135	0.00350061	-0.838799	-1.7964	0.0592018	1.02976	0.103425	1.08303	0.751105	0.0128557
salt (5h) > Stress	salt (5h) / untreated shoot samples (5h)	OS-00148	E-MTAB-1625: RNA-seq of coding RNA in rice (Oryza sativa L. japonica Nipponbare) under salt stress over a time-course, Gramene project	3	3	0.0140228	1.02569	0.944359	0.000348647	-0.389904	-1.30121	0.0429599	0.532975	0.237364	1.22558	0.304433	0.122601	-0.192251	-1.13223	0.171303	0.147309	0.226563	1.17638	0.0584071	0.279474	-0.111678	-1.0874	0.435522	0.0403145	0.223232	1.24715	0.645146	0.0424903	0.123153	1.09043	0.0711495	0.141358	-0.145041	-1.10759	0.196828	0.102387	0.120395	1.09038	0.30711	0.0617272	0.0561299	1.04172	0.564651	0.0139326
drought (8d) > Stress	drought (8d) / untreated leaf samples (8d)	OS-00369	SRP067728: Oryza sativa gene expression under drought stress	2	3	0.0445695	1.01147	0.792463	0.00450245	-0.495443	-1.38745	0.15572	0.400148	-0.406822	-1.25163	0.280237	0.224759	-0.0243035	-1.0297	0.897244	0.00114444	0.207888	1.15425	0.081623	0.226221	0.252493	1.17034	0.207205	0.172604	-0.189324	-1.11702	0.477055	0.0608548	-0.0865688	-1.06172	0.213126	0.0581191	-0.14014	-1.09751	0.428649	0.0515574	0.0225506	1.01658	0.817395	0.00197471	0.0772738	1.06392	0.75804	0.00929664
heat recovery (Azucena; 195min) > Stress	heat recovery (Azucena; 195min) / heat (Azucena; 120min)	OS-00144	GSE74793: Rice gene expression in heat stress and dehydration stress - time series	2	2	0.0129752	1.00879	0.980783	0.000109346	-0.728926	-1.19926	0.531869	0.199868	-0.548194	-1.21579	0.529187	0.151516	0.238403	1.1729	0.309841	0.121314	-0.93852	-1.91092	0.0605613	1.14293	-0.519354	-1.40502	0.220871	0.340624	-0.747732	-1.6897	0.0924721	0.773147	-0.139553	-1.10321	0.360625	0.0618143	-0.186998	-1.13254	0.38552	0.0774082	-0.0929041	-1.07902	0.678483	0.0156507	0.0312879	-1.03706	0.948411	0.000719736
heat recovery (Azucena; 150min) > Stress	heat recovery (Azucena; 150min) / heat (Azucena; 120min)	OS-00144	GSE74793: Rice gene expression in heat stress and dehydration stress - time series	2	2	-0.0119019	-1.04601	0.978556	0.000112049	-0.42923	-1.3897	0.336079	0.203265	-0.653959	-1.58583	0.17079	0.501937	-0.0215609	-1.01853	0.921816	0.000762302	-0.856107	-1.81167	0.0700136	0.988648	-0.00182652	1.01554	0.99554	3.5456e-06	0.295115	1.24711	0.459751	0.0995944	0.0274501	1.03479	0.935237	0.000798197	-0.0179694	-1.00637	0.930031	0.000566081	-0.137712	-1.11037	0.580516	0.0325255	0.0392852	-1.01837	0.940414	0.00104817
rehydration (Azucena; 120min) > Stress	rehydration (Azucena; 120min) / dehydration (Azucena; 90min)	OS-00144	GSE74793: Rice gene expression in heat stress and dehydration stress - time series	2	2	-0.0762546	-1.0492	0.719666	0.0108944	1.46124	2.59217	0.183067	1.0775	-0.484204	-1.55013	0.719366	0.0692655	-0.164233	-1.12089	0.372745	0.0703882	-0.304407	-1.25271	0.62779	0.0615467	-0.243976	-1.14505	0.519652	0.0693593	0.000736713	1.00251	0.997214	8.9262e-07	-0.0721426	-1.05259	0.840775	0.00543379	-0.243403	-1.18629	0.424783	0.0905054	-0.579532	-1.49445	0.081621	0.630645	-0.327063	-1.45965	0.635046	0.0644952
heat recovery (Azucena; 180min) > Stress	heat recovery (Azucena; 180min) / heat (Azucena; 120min)	OS-00144	GSE74793: Rice gene expression in heat stress and dehydration stress - time series	2	2	-0.0268497	-1.06735	0.94784	0.000624664	0.119757	1.16048	0.852612	0.00829301	-0.503891	-1.42741	0.250512	0.302925	-0.231912	-1.172	0.388989	0.0950984	-0.794638	-1.73452	0.0776814	0.881797	-0.169236	-1.06429	0.716384	0.0245146	0.229707	1.25007	0.664251	0.0408116	-0.0121785	-1.00738	0.941671	0.000317868	-0.640057	-1.5544	0.0573332	0.794691	0.106829	1.06435	0.63864	0.0208043	0.197841	1.13669	0.747985	0.0249492
heat (Azucena; 90min) > Stress	heat (Azucena; 90min) / untreated leaf samples (Azucena; 90min)	OS-00144	GSE74793: Rice gene expression in heat stress and dehydration stress - time series	2	2	-0.0656691	-1.07213	0.851395	0.00458823	-1.52218	-2.71707	0.0736798	1.7241	-0.26896	-1.32725	0.729049	0.0369129	0.265197	1.20853	0.383375	0.110422	-0.4509	-1.3361	0.3613	0.199357	0.240153	1.18451	0.430454	0.0879135	-0.961632	-1.95274	0.133133	0.842115	-0.0728027	-1.04454	0.83579	0.00567155	0.467113	1.38122	0.295053	0.247616	0.149783	1.0675	0.722289	0.0211626	-0.486767	-1.46091	0.388125	0.200075
dehydration (Azucena; 60min) > Stress	dehydration (Azucena; 60min) / untreated leaf samples (Azucena; 60min)	OS-00144	GSE74793: Rice gene expression in heat stress and dehydration stress - time series	2	2	-0.102994	-1.08414	0.698349	0.0160596	-2.15933	-4.49216	0.0282068	3.34619	1.25685	2.37878	0.0655675	1.48724	0.696009	1.5688	0.156912	0.55983	0.263283	1.20445	0.362846	0.115917	0.0615556	1.12171	0.901577	0.00276984	0.275602	1.21279	0.401263	0.109296	0.264954	1.205	0.255999	0.15679	0.0534257	1.13154	0.927581	0.00174424	-0.0823045	-1.06345	0.678593	0.0138593	0.650537	1.60046	0.327406	0.315455
submergence (Taichung 65; 12h; 22d) > Stress	submergence (Taichung 65; 12h; 22d) / untreated shoot base samples (Taichung 65; 22d)	OS-00362	DRP003400: Comparative transcriptomics of deepwater rice	3	3	-0.147157	-1.08729	0.381982	0.0615055	5.56005	46.3227	6.63645e-06	22.2402	1.08993	2.09162	0.0174862	1.91533	0.0546531	1.03899	0.789323	0.00561536	0.588362	1.55345	0.0341835	0.862646	0.47083	1.4235	0.0524869	0.602639	-0.255371	-1.17036	0.244013	0.156437	-0.376273	-1.29605	0.0524045	0.481867	-0.108371	-1.07312	0.404888	0.0425534	-0.933087	-1.9041	0.00345335	2.29704	0.000820994	-1.01442	0.997581	8.63524e-07
submergence (Taichung 65; 6h; 22d) > Stress	submergence (Taichung 65; 6h; 22d) / untreated shoot base samples (Taichung 65; 22d)	OS-00362	DRP003400: Comparative transcriptomics of deepwater rice	3	3	-0.314495	-1.21546	0.13163	0.276959	5.4578	43.2911	8.31291e-06	21.8312	0.796277	1.6446	0.0246242	1.28092	0.0260063	1.01949	0.912872	0.00102959	0.101071	1.07216	0.407443	0.0394111	0.140192	1.1134	0.380571	0.0588195	-0.176322	-1.14399	0.203062	0.122081	-0.140695	-1.09755	0.409271	0.0545881	0.0865273	1.07561	0.578421	0.0205724	-0.597539	-1.51085	0.00691457	1.29083	0.0664742	1.14507	0.871026	0.00398637
submergence (Taichung 65; 24h; 22d) > Stress	submergence (Taichung 65; 24h; 22d) / untreated shoot base samples (Taichung 65; 22d)	OS-00362	DRP003400: Comparative transcriptomics of deepwater rice	3	3	-0.320827	-1.251	0.0175839	0.563015	4.96827	30.8489	1.19908e-05	19.8731	0.360878	1.22691	0.201869	0.250786	0.02333	1.01626	0.898244	0.00108731	1.00905	2.01086	0.00031611	3.53183	0.531228	1.47928	0.0272893	0.830845	0.415419	1.32993	0.0392156	0.584304	0.129955	1.09814	0.401143	0.0515534	-0.264746	-1.156	0.221763	0.173173	-0.728538	-1.65687	0.00152635	2.05181	0.198333	1.17628	0.529331	0.0547941
dehydration (Azucena; 75min) > Stress	dehydration (Azucena; 75min) / untreated leaf samples (Azucena; 75min)	OS-00144	GSE74793: Rice gene expression in heat stress and dehydration stress - time series	2	2	-0.375965	-1.29861	0.106784	0.365247	-1.09899	-1.99619	0.173128	0.837028	1.21028	2.19927	0.0829769	1.30836	0.382165	1.30671	0.0961745	0.388639	0.0135369	1.00845	0.958094	0.00025168	-0.494567	-1.34411	0.351184	0.224763	0.199911	1.31549	0.773499	0.0222982	-0.0981716	-1.07043	0.248159	0.0594202	-0.359604	-1.22705	0.392376	0.146106	-0.52149	-1.37417	0.256654	0.308019	0.725106	1.6654	0.177929	0.54365
drought (26d) > Stress	drought (26d) / untreated leaf samples (26d)	OS-00369	SRP067728: Oryza sativa gene expression under drought stress	3	3	-0.375656	-1.29991	0.00528249	0.85543	-0.11365	-1.1021	0.541822	0.0302471	1.3866	2.71393	0.00136511	3.97237	-0.496682	-1.44634	0.0302659	0.754483	0.342287	1.25465	0.0503085	0.444411	0.271439	1.1998	0.0572022	0.337287	-0.351545	-1.29568	0.161751	0.278126	0.112863	1.08008	0.219925	0.0742331	0.393342	1.3086	0.00849334	0.814581	0.076353	1.05687	0.322248	0.0375512	-0.738167	-1.75628	0.0393465	1.03719
submergence (Taichung 65; 1h; 22d) > Stress	submergence (Taichung 65; 1h; 22d) / untreated shoot base samples (Taichung 65; 22d)	OS-00362	DRP003400: Comparative transcriptomics of deepwater rice	3	3	-0.402858	-1.32261	0.0155175	0.728842	5.69105	50.6629	5.77005e-06	22.7642	0.7281	1.56668	0.0311909	1.0965	-0.0370342	-1.02668	0.883529	0.00199166	0.0315254	1.04258	0.851401	0.00220255	-0.2422	-1.17114	0.156773	0.194906	-0.418284	-1.35024	0.0262789	0.661053	-0.102271	-1.07957	0.456981	0.0347825	-0.81571	-1.73714	0.00400177	1.95587	-0.285804	-1.21474	0.0781289	0.316439	0.459831	1.34644	0.125127	0.415066
heat (Azucena; 45min) > Stress	heat (Azucena; 45min) / untreated leaf samples (Azucena; 45min)	OS-00144	GSE74793: Rice gene expression in heat stress and dehydration stress - time series	2	2	-0.427325	-1.34077	0.398108	0.170929	-0.653905	-1.57965	0.347771	0.29995	0.903732	2.19994	0.286244	0.490964	0.0212103	1.09193	0.9703	0.000277723	-0.106273	-1.07965	0.769359	0.0121014	-0.195384	-1.18211	0.627636	0.0395246	0.315729	1.27356	0.437375	0.113393	-0.176929	-1.1365	0.582733	0.0414952	-0.319589	-1.24655	0.181549	0.236817	-0.0769546	-1.03733	0.785571	0.00806598	0.286656	1.22	0.288744	0.154647
heat (Azucena; 60min) > Stress	heat (Azucena; 60min) / untreated leaf samples (Azucena; 60min)	OS-00144	GSE74793: Rice gene expression in heat stress and dehydration stress - time series	2	2	-0.425318	-1.35399	0.192598	0.304251	-1.08525	-1.61082	0.336989	0.512657	0.05618	1.02834	0.876706	0.00321047	0.055011	1.01566	0.882596	0.0029837	-0.812451	-1.55932	0.281212	0.447633	-0.474144	-1.2886	0.392927	0.192355	0.377948	1.32441	0.331753	0.181107	0.221591	1.16581	0.198141	0.155784	0.251024	1.17327	0.369207	0.108625	-0.167864	-1.12713	0.418843	0.0634441	-0.693197	-1.67728	0.212789	0.465864
dehydration (Azucena; 90min) > Stress	dehydration (Azucena; 90min) / untreated leaf samples (Azucena; 90min)	OS-00144	GSE74793: Rice gene expression in heat stress and dehydration stress - time series	2	2	-0.447525	-1.39808	0.248941	0.270262	0.116838	1.25779	0.862739	0.00749176	3.41552	13.0228	0.0859187	3.64065	0.18922	1.1389	0.368476	0.082044	1.46212	2.95362	0.0790237	1.61161	-0.147952	-1.10796	0.507302	0.0436064	0.0724521	1.03423	0.814979	0.00643762	-0.170781	-1.12432	0.466163	0.0566075	-0.302499	-1.24311	0.409746	0.117214	0.629375	1.48513	0.211181	0.425045	1.24194	2.62315	0.209919	0.841971
submergence (Taichung 65; 3h; 22d) > Stress	submergence (Taichung 65; 3h; 22d) / untreated shoot base samples (Taichung 65; 22d)	OS-00362	DRP003400: Comparative transcriptomics of deepwater rice	3	3	-0.569297	-1.48352	0.00601558	1.26425	5.42923	42.2287	6.80324e-06	21.7169	1.30532	2.45524	0.0103216	2.59269	0.0217846	1.01625	0.925962	0.000727756	0.252872	1.22272	0.211098	0.170819	-0.387601	-1.29237	0.0631677	0.464929	-0.640007	-1.57542	0.00623394	1.41137	0.0158098	1.06039	0.949737	0.00035409	-0.48349	-1.32555	0.0982363	0.487226	-0.892142	-1.83431	0.00771664	1.88471	-0.0772287	-1.07235	0.78265	0.00821963
drought (20d) > Stress	drought (20d) / untreated leaf samples (20d)	OS-00369	SRP067728: Oryza sativa gene expression under drought stress	2	2	-0.645624	-1.58166	0.0691105	0.749218	-0.35948	-1.27351	0.256199	0.212605	0.628191	1.58405	0.132912	0.550569	0.00440288	1.00583	0.972791	5.2749e-05	0.256959	1.20589	0.248602	0.15533	-0.216766	-1.16168	0.101408	0.215451	0.284894	1.21803	0.137183	0.245777	0.0187463	1.01305	0.76753	0.00215403	0.175711	1.12714	0.308752	0.0896811	0.0429501	1.03033	0.603358	0.00942432	-0.108423	-1.08887	0.689564	0.0175023
[truncated: 132 more columns]

## Sheet: raw_log2
					Path from root	salt (1h) > Stress	salt (24h) > Stress	dehydration (Azucena; 30min) > Stress	drought (3d) > Stress	heat (Azucena; 120min) > Stress	heat (Azucena; 30min) > Stress	salt (5h) > Stress	drought (8d) > Stress	heat (Azucena; 90min) > Stress	dehydration (Azucena; 60min) > Stress	submergence (Taichung 65; 12h; 22d) > Stress	submergence (Taichung 65; 6h; 22d) > Stress	submergence (Taichung 65; 24h; 22d) > Stress	dehydration (Azucena; 75min) > Stress	drought (26d) > Stress	submergence (Taichung 65; 1h; 22d) > Stress	heat (Azucena; 45min) > Stress	heat (Azucena; 60min) > Stress	dehydration (Azucena; 90min) > Stress	submergence (Taichung 65; 3h; 22d) > Stress	drought (20d) > Stress
					Perturbations	salt (1h) / untreated shoot samples (1h)	salt (24h) / untreated shoot samples (24h)	dehydration (Azucena; 30min) / untreated leaf samples (Azucena; 30min)	drought (3d) / untreated root samples	heat (Azucena; 120min) / untreated leaf samples (Azucena; 120min)	heat (Azucena; 30min) / untreated leaf samples (Azucena; 30min)	salt (5h) / untreated shoot samples (5h)	drought (8d) / untreated leaf samples (8d)	heat (Azucena; 90min) / untreated leaf samples (Azucena; 90min)	dehydration (Azucena; 60min) / untreated leaf samples (Azucena; 60min)	submergence (Taichung 65; 12h; 22d) / untreated shoot base samples (Taichung 65; 22d)	submergence (Taichung 65; 6h; 22d) / untreated shoot base samples (Taichung 65; 22d)	submergence (Taichung 65; 24h; 22d) / untreated shoot base samples (Taichung 65; 22d)	dehydration (Azucena; 75min) / untreated leaf samples (Azucena; 75min)	drought (26d) / untreated leaf samples (26d)	submergence (Taichung 65; 1h; 22d) / untreated shoot base samples (Taichung 65; 22d)	heat (Azucena; 45min) / untreated leaf samples (Azucena; 45min)	heat (Azucena; 60min) / untreated leaf samples (Azucena; 60min)	dehydration (Azucena; 90min) / untreated leaf samples (Azucena; 90min)	submergence (Taichung 65; 3h; 22d) / untreated shoot base samples (Taichung 65; 22d)	drought (20d) / untreated leaf samples (20d)
Ensembl Gene	MSU Locus	MSU Transcript	Gene	Measure	# samples control	3	3	2	2	2	2	3	3	2	2	3	3	3	2	3	3	2	2	2	3	2
					# samples experiment	3	3	2	2	2	2	3	2	2	2	3	3	3	2	3	3	2	2	2	3	2
					Experiment	OS-00148	OS-00148	OS-00144	OS-00230	OS-00144	OS-00144	OS-00148	OS-00369	OS-00144	OS-00144	OS-00362	OS-00362	OS-00362	OS-00144	OS-00369	OS-00362	OS-00144	OS-00144	OS-00144	OS-00362	OS-00369
					Experiment Title	E-MTAB-1625: RNA-seq of coding RNA in rice (Oryza sativa L. japonica Nipponbare) under salt stress over a time-course, Gramene project	E-MTAB-1625: RNA-seq of coding RNA in rice (Oryza sativa L. japonica Nipponbare) under salt stress over a time-course, Gramene project	GSE74793: Rice gene expression in heat stress and dehydration stress - time series	GSE92989: An RNA-Seq transcriptome analysis of rice genes in response to soil-water deficiencies and the identification of OsPhyB-mediating novel regulatory pathway for drought tolerance in root	GSE74793: Rice gene expression in heat stress and dehydration stress - time series	GSE74793: Rice gene expression in heat stress and dehydration stress - time series	E-MTAB-1625: RNA-seq of coding RNA in rice (Oryza sativa L. japonica Nipponbare) under salt stress over a time-course, Gramene project	SRP067728: Oryza sativa gene expression under drought stress	GSE74793: Rice gene expression in heat stress and dehydration stress - time series	GSE74793: Rice gene expression in heat stress and dehydration stress - time series	DRP003400: Comparative transcriptomics of deepwater rice	DRP003400: Comparative transcriptomics of deepwater rice	DRP003400: Comparative transcriptomics of deepwater rice	GSE74793: Rice gene expression in heat stress and dehydration stress - time series	SRP067728: Oryza sativa gene expression under drought stress	DRP003400: Comparative transcriptomics of deepwater rice	GSE74793: Rice gene expression in heat stress and dehydration stress - time series	GSE74793: Rice gene expression in heat stress and dehydration stress - time series	GSE74793: Rice gene expression in heat stress and dehydration stress - time series	DRP003400: Comparative transcriptomics of deepwater rice	SRP067728: Oryza sativa gene expression under drought stress
						Salt_1h	Salt_24h	Dehydration_30m	Drought_3d	Heat_2h	Heat_30m	Salt_5h	Drought_8d	Heat_1.5h	Dehydration_1h	Submergence_12h	Submergence_6h	Submergence_24h		Drought_26d	Submergence_1h	Heat_45m	Heat_1h	Dehydration_1.5h	Submergence_3h	Drought_20d
OS01G0170600	LOC_Os01g07590	LOC_Os01g07590.1	LOC_Os01g07590	LOC_Os01g07590	Fold-Change	1.1508	1.1127	1.09561	1.08697	1.07925	1.06199	1.02569	1.01147	-1.07213	-1.08414	-1.08729	-1.21546	-1.251	-1.29861	-1.29991	-1.32261	-1.34077	-1.35399	-1.39808	-1.48352	-1.58166
OS01G0303800	LOC_Os01g19820	LOC_Os01g19820.1,LOC_Os01g19820.2,LOC_Os01g19820.3,LOC_Os01g19820.4	LOC_Os01g19820	LOC_Os01g19820	Fold-Change	1.25547	-1.46823	-1.14974	-3.5235	-1.44206	-1.99009	-1.30121	-1.38745	-2.71707	-4.49216	46.3227	43.2911	30.8489	-1.99619	-1.1021	50.6629	-1.57965	-1.61082	1.25779	42.2287	-1.27351
OS01G0511100	LOC_Os01g32780	LOC_Os01g32780.1	LOC_Os01g32780	LOC_Os01g32780	Fold-Change	-1.3498	3.14998	-1.20227	73.3467	2.29237	1.12128	1.22558	-1.25163	-1.32725	2.37878	2.09162	1.6446	1.22691	2.19927	2.71393	1.56668	2.19994	1.02834	13.0228	2.45524	1.58405
OS01G0581400	LOC_Os01g39970	LOC_Os01g39970.1	LOC_Os01g39970	LOC_Os01g39970	Fold-Change	1.00285	-1.09527	1.04771	1	-1.11429	1.12589	-1.13223	-1.0297	1.20853	1.5688	1.03899	1.01949	1.01626	1.30671	-1.44634	-1.02668	1.09193	1.01566	1.1389	1.01625	1.00583
OS01G0783500	LOC_Os01g57450	LOC_Os01g57450.1	LOC_Os01g57450	LOC_Os01g57450	Fold-Change	-1.23242	1.843	1.10148	4.40778	2.10748	1.24902	1.17638	1.15425	-1.3361	1.20445	1.55345	1.07216	2.01086	1.00845	1.25465	1.04258	-1.07965	-1.55932	2.95362	1.22272	1.20589
OS01G0849600	LOC_Os01g63010	LOC_Os01g63010.1	LOC_Os01g63010	LOC_Os01g63010	Fold-Change	1.2391	1.06915	1.30472	1.14744	1.31153	-1.36824	-1.0874	1.17034	1.18451	1.12171	1.4235	1.1134	1.47928	-1.34411	1.1998	-1.17114	-1.18211	-1.2886	-1.10796	-1.29237	-1.16168
OS01G0875300	LOC_Os01g65440	LOC_Os01g65440.1	LOC_Os01g65440	LOC_Os01g65440	Fold-Change	1.04457	1.4072	1.18485	-4.7655	1.38996	-1.73226	1.24715	-1.11702	-1.95274	1.21279	-1.17036	-1.14399	1.32993	1.31549	-1.29568	-1.35024	1.27356	1.32441	1.03423	-1.57542	1.21803
OS02G0152300	LOC_Os02g05820	LOC_Os02g05820.1	LOC_Os02g05820	LOC_Os02g05820	Fold-Change	1.00929	-1.04594	1.48538	-1.19016	-1.06819	1.04827	1.09043	-1.06172	-1.04454	1.205	-1.29605	-1.09755	1.09814	-1.07043	1.08008	-1.07957	-1.1365	1.16581	-1.12432	1.06039	1.01305
OS02G0218400	LOC_Os02g12660	LOC_Os02g12660.1	LOC_Os02g12660	LOC_Os02g12660	Fold-Change	-1.15844	1.00775	1.47916	2.14813	1.79716	-1.00552	-1.10759	-1.09751	1.38122	1.13154	-1.07312	1.07561	-1.156	-1.22705	1.3086	-1.73714	-1.24655	1.17327	-1.24311	-1.32555	1.12714
OS02G0218600	LOC_Os02g12670	LOC_Os02g12670.1	LOC_Os02g12670	LOC_Os02g12670	Fold-Change	-1.03443	-1.05182	-1.36482	-1.37682	1.05151	-1.7964	1.09038	1.01658	1.0675	-1.06345	-1.9041	-1.51085	-1.65687	-1.37417	1.05687	-1.21474	-1.03733	-1.12713	1.48513	-1.83431	1.03033
OS02G0705400	LOC_Os02g47650	LOC_Os02g47650.1	LOC_Os02g47650	LOC_Os02g47650	Fold-Change	-1.27011	1.59079	1.68508	1.67409	1.14721	1.08303	1.04172	1.06392	-1.46091	1.60046	-1.01442	1.14507	1.17628	1.6654	-1.75628	1.34644	1.22	-1.67728	2.62315	-1.07235	-1.08887
OS02G0707900	LOC_Os02g47840	LOC_Os02g47840.1	LOC_Os02g47840	LOC_Os02g47840	Fold-Change	-1.31492	2.20982	1.18892	17.8533	1.34377	-1.23045	-1.04028	-1.34813	-1.13711	-1.24716	1.04517	-1.02766	-1.07785	-1.02509	1.15609	1.09816	-1.03677	1.10799	2.96887	-1.26987	1.08476
OS02G0760500	LOC_Os02g52314	LOC_Os02g52314.1	LOC_Os02g52314	LOC_Os02g52314	Fold-Change	-1.03998	-1.09415	1.18697	1.1491	-1.4826	-2.26804	1.12787	1.41701	-1.91403	-1.54724	1.267	1.12433	1.13952	-1.5319	-1.0492	1.02692	-1.58574	-1.89574	-1.33665	1.30354	1.05555
OS02G0773200	LOC_Os02g53320	LOC_Os02g53320.1	LOC_Os02g53320	LOC_Os02g53320	Fold-Change	-1.33868	2.57793	1.99698	3.78016	8.97889	45.4803	1.01747	2.9608	8.02023	1.04767	-1.24433	-1.33615	-1.49415	-1.05939	5.25701	1.15567	40.3605	19.2563	-1.41945	-1.64329	3.09882
OS02G0787200	LOC_Os02g54590	LOC_Os02g54590.1	LOC_Os02g54590	LOC_Os02g54590	Fold-Change	-1.02915	1.07339	1.26328	-1.02459	1.0567	1.22207	-1.03545	-1.03724	1.0537	1.37462	1.3777	1.09355	1.10006	-1.1454	-1.00897	-1.03337	-1.12972	1.27462	1.20384	-1.00001	1.01372
OS03G0241400,OS03G0241600	LOC_Os03g13820	LOC_Os03g13820.1,LOC_Os03g13820.2	LOC_Os03g13820	LOC_Os03g13820	Fold-Change	-1.12435	-1.29313	-1.04499	-7.20433	1.01122	-2.3023	1.1799	2.04011	-1.39998	-1.37966	-1.52486	-2.01989	-1.05486	-1.87862	-1.62745	-2.35061	-1.43518	-1.71067	-1.08289	-2.00012	1.72908
OS03G0305400	LOC_Os03g19270	LOC_Os03g19270.1,LOC_Os03g19270.2,LOC_Os03g19270.3,LOC_Os03g19270.4	LOC_Os03g19270	LOC_Os03g19270	Fold-Change	1.22749	-2.1037	-1.25355	1.63881	1.06248	-1.1821	-1.27843	1.01814	1.27125	-1.24739	98.6801	100.743	37.6037	1.79046	1.28051	82.3561	-1.04159	-1.64001	9.68987	128.767	1.11282
	LOC_Os03g22390		LOC_Os03g22390	LOC_Os03g22390	Fold-Change	-1.03562	-1.01103	1.19146	1	1	1	1.31506	-1.11454	1	1	1	1	1.13346	-1.0749	-1.10038	1	1	1	1.1753	1.49033	-1.00469
OS03G0750000	LOC_Os03g53900	LOC_Os03g53900.1,LOC_Os03g53900.2,LOC_Os03g53900.3,LOC_Os03g53900.4,LOC_Os03g53900.5	LOC_Os03g53900	LOC_Os03g53900	Fold-Change	-1.09489	1.39808	1.08447	85.004	-1.07833	1.12052	1.13284	-1.03369	1.27926	-1.36874	1.20347	1	1	-1.40709	-1.06349	1	1.04602	-1.07126	-1.28519	1.36356	1.16235
OS03G0839900	LOC_Os03g62340	LOC_Os03g62340.1	LOC_Os03g62340	LOC_Os03g62340	Fold-Change	-1.12461	1.02587	1.00236	-1.77199	1.17868	-1.72966	1.03967	1.44994	-1.17746	1.42032	-1.54079	-1.29144	-1.39072	-1.05026	1.0594	-1.28277	-1.03693	-1.38103	1.29946	-1.45253	-1.13814
OS05G0157200	LOC_Os05g06500	LOC_Os05g06500.1	LOC_Os05g06500	LOC_Os05g06500	Fold-Change	1.1164	1.42737	1.18682	1.89597	1.50221	1.03361	1.11515	-1.7643	1.38562	-1.21048	1.15749	1.00632	1.04543	-1.30823	-1.0692	-1.06995	1.01123	-1.0211	1.09949	-1.17929	-1.06178
OS05G0170200	LOC_Os05g07810	LOC_Os05g07810.1	LOC_Os05g07810	LOC_Os05g07810	Fold-Change	-1.50094	3.76819	1.1499	14.1814	1.73306	1.9578	1.44154	-1.0355	-1.8187	1.21858	10.3812	14.6216	12.8276	-1.39506	1.74481	5.90912	1.14633	2.33568	2.63016	39.3807	1.39763
OS05G0355400	LOC_Os05g28740	LOC_Os05g28740.1	LOC_Os05g28740	LOC_Os05g28740	Fold-Change	1.07535	1.715	1.05275	6.80651	-1.77842	-1.97574	-1.09747	-5.66538	-1.29845	-2.65119	94.3046	84.379	73.7959	1.42448	2.41804	27.0826	-2.99201	-2.21198	4.48706	99.1869	3.0184
OS05G0428400	LOC_Os05g35380	LOC_Os05g35380.1	LOC_Os05g35380	LOC_Os05g35380	Fold-Change	-1.03602	1.4088	1.39082	-3.32059	1.08488	-1.40431	1.24205	1	-1.09758	-1.03917	1.62838	1.3827	1.81739	1.17173	1	1.37147	-1.408	-1.30324	1.24481	1.3181	1.03004
OS05G0453700	LOC_Os05g37970	LOC_Os05g37970.1,LOC_Os05g37970.2,LOC_Os05g37970.3,LOC_Os05g37970.4	LOC_Os05g37970	LOC_Os05g37970	Fold-Change	-1.00521	1.37912	1.30467	1.72623	-1.03991	-1.66459	1.31193	1.14395	-2.08255	1.13032	1.84634	1.91502	2.26093	-1.34907	-1.08264	1.04931	-1.62035	-1.00292	1.22741	1.84644	1.40052
OS05G0501700	LOC_Os05g42230	LOC_Os05g42230.1	LOC_Os05g42230	LOC_Os05g42230	Fold-Change	-1.04689	1.27444	1.05716	5.73618	1.3233	-1.74941	1.15015	-1.18647	-1.96546	1.45395	1.67462	2.16151	5.82832	-1.50447	-1.06145	-1.19846	-1.56093	-1.15298	1.45194	2.02482	1.25504
OS06G0140800	LOC_Os06g04880	LOC_Os06g04880.1	LOC_Os06g04880	LOC_Os06g04880	Fold-Change	-1.12366	1.15017	1.29767	-2.45419	1.1557	-1.62545	-1.12985	-1.08901	-1.32115	-1.1883	1.96283	1.28962	-1.07081	-1.17132	-1.48695	-1.02265	-1.22116	-1.42528	1.42126	1.11252	-1.05238
OS06G0191900	LOC_Os06g09230	LOC_Os06g09230.2	LOC_Os06g09230	LOC_Os06g09230	Fold-Change	1.11121	-1.46764	-1.10265	-1.21331	1.23385	-1.25436	-1.05444	1.39409	1.00403	1.02704	-1.15345	-1.00006	-1.07126	-1.15117	1.44399	-1.15345	-1.14132	1.07577	-1.0577	-1.11983	1.74114
OS06G0574200	LOC_Os06g37620	LOC_Os06g37620.1	LOC_Os06g37620	LOC_Os06g37620	Fold-Change	1.03361	-1.24843	1.14931	-1.44315	1.08824	-1.90636	-1.23315	-1.40439	-1.48251	1.12611	1.4433	1.08657	-1.19307	-1.0783	-3.84721	-1.21203	-1.28145	-1.25735	1.38206	1.29217	-1.99152
OS07G0551400	LOC_Os07g36600	LOC_Os07g36600.1,LOC_Os07g36600.2,LOC_Os07g36600.3	LOC_Os07g36600	LOC_Os07g36600	Fold-Change	-1.09904	1.22417	1.02179	-1.3162	1.31695	1.64638	1.01557	1.06913	-1.14081	-1.14806	1.97069	1.58064	2.01445	-1.07262	-1.14348	1.2967	1.05205	1.13777	1.78271	1.7581	-1.08777
OS07G0673400	LOC_Os07g47620	LOC_Os07g47620.1	LOC_Os07g47620	LOC_Os07g47620	Fold-Change	1.14405	-1.14587	1.31366	-1.28037	1.02039	1.35523	-1.16804	-1.20055	1.22383	-1.45644	20.5527	29.1591	10.4253	-1.41786	-1.02354	11.5802	1.26975	-1.21827	-1.18799	89.0865	-1.35294
OS08G0249100	LOC_Os08g15060	LOC_Os08g15060.1	LOC_Os08g15060	LOC_Os08g15060	Fold-Change	-1.11304	-1.06489	1.73645	-6.29029	-1.26989	-1.99281	1.07959	1.3148	-1.6756	-1.97593	-2.20394	-2.14463	-2.31699	-1.4369	-1.05787	-2.04997	-1.60071	-1.54206	-1.86945	-3.02757	1.09461
OS09G0569800	LOC_Os09g39620	LOC_Os09g39620.1	LOC_Os09g39620	LOC_Os09g39620	Fold-Change	-1.09607	1.01744	-1.00337	-1.37645	-1.05538	-1.70037	-1.33582	-1.96265	-1.33256	1.44117	1.22358	-1.03537	-1.52586	1.30005	-22.7055	-1.13893	-1.37687	-1.30082	1.42389	1.03026	-5.55189
OS09G0570000	LOC_Os09g39640	LOC_Os09g39640.1	LOC_Os09g39640	LOC_Os09g39640	Fold-Change	-1.15885	-1.04496	1.19124	1.03885	1.02024	-2.14226	-1.18663	-1.08349	-1.78744	-1.41465	1.37777	-1.02069	-1.17624	-1.34687	-1.24492	-1.1658	-1.55232	-1.87506	-1.14543	1.02272	1.15454
OS10G0100500	LOC_Os10g01060	LOC_Os10g01060.1	LOC_Os10g01060	LOC_Os10g01060	Fold-Change	1.08705	-1.14051	1.1042	-3.22393	1.22519	-2.27213	-1.0884	-1.19979	-1.44733	1.02544	1.10187	1.02496	-1.0767	-1.40457	-1.39137	1.14989	-1.80315	-1.60682	-1.29592	1.02217	-1.18666
OS10G0437500	LOC_Os10g30150	LOC_Os10g30150.1,LOC_Os10g30150.2	LOC_Os10g30150	LOC_Os10g30150	Fold-Change	1.33806	1.07071	-1.01938	5.1814	1	-1.2601	-1.18132	-1.0334	-1.41474	-1.09666	125.115	90.6582	106.198	1.00487	-1.06072	10.9907	-1.38329	-1.34333	2.18011	124.601	-1.1246
OS10G0463300	LOC_Os10g32590	LOC_Os10g32590.1	LOC_Os10g32590	LOC_Os10g32590	Fold-Change	1	1	1	1	1	1	1	-1.02672	1	1.33285	1	1	1	1	-1.1379	1	1.1143	1	1.07012	1	1
OS10G0561500	LOC_Os10g41220	LOC_Os10g41220.1	LOC_Os10g41220	LOC_Os10g41220	Fold-Change	-1.12639	-1.37141	1.01164	1.17317	1.54319	-1.26743	-1.00539	1.00989	1.01546	-1.36823	1.04675	1.1597	-1.50351	-1.54372	-1.22691	-1.19878	-1.1295	-1.09814	-1.12361	1.30589	1.03916
OS11G0194900	LOC_Os11g08950	LOC_Os11g08950.1	LOC_Os11g08950	LOC_Os11g08950	Fold-Change	-1.22861	1.15497	-1.02291	3.42874	1.87337	1.25102	-1.01333	1.20419	1.25613	1.03326	2.1978	1.17328	-1.03919	1.00363	2.0505	1.28233	2.08854	1.42426	1.87929	1.90006	1.78112
OS12G0180500	LOC_Os12g07990	LOC_Os12g07990.1	LOC_Os12g07990	LOC_Os12g07990	Fold-Change	-1.02307	1.02233	1.04787	-2.25013	1.10212	1.41474	1	-1.03812	1	-1.05722	-1.11871	-1.0976	-1.14439	1.04769	1.11562	-1.16349	1.41456	1.04916	1.07737	-1.10453	-1.04313
OS12G0181200	LOC_Os12g08060	LOC_Os12g08060.1	LOC_Os12g08060	LOC_Os12g08060	Fold-Change	-1.02322	1.02654	1.53311	-1.28915	1.07111	1	1.01989	-1.02671	-1.03187	1.38991	-1.66855	-1.07797	-1.87457	1.0434	-1.0162	-1.29134	-1.08568	-1.08026	1.02781	-1.05369	1.00981
OS12G0501400	LOC_Os12g31710	LOC_Os12g31710.1	LOC_Os12g31710	LOC_Os12g31710	Fold-Change	1.00583	1.22288	1.16336	1	1	1	1.0663	1	1	1.38405	-1.4864	-1.33333	1.04399	1.06415	1	-1.13604	1.1143	1	1.08462	-1.55345	-1.04005
OS12G0552400	LOC_Os12g36630	LOC_Os12g36630.1	LOC_Os12g36630	LOC_Os12g36630	Fold-Change	-1.1476	2.08974	1.58774	2.03896	-1.64364	1.72987	1.27081	-1.13331	1.18962	-1.01252	4.53281	2.42378	3.51092	1.84856	-1.0204	2.61	-1.91748	-1.16497	3.54474	2.28916	1.28967
OS12G0552500	LOC_Os12g36640	LOC_Os12g36640.1,LOC_Os12g36640.2	LOC_Os12g36640	LOC_Os12g36640	Fold-Change	-1.07586	1.43373	-1.2192	3.5005	1.6918	1.43714	1.16207	1.02676	1.21085	-2.03156	2.81545	2.24737	2.71566	-1.15946	1.43656	1.71799	1.28612	1.02447	1.64727	2.04376	1.17809

## Sheet: USP_treatment_sorted
Genevestigator ID	Converted ID (RAP)	Final IDs	MSU_ID (Old)	MSU ID	Salt_1h	Salt_24h	Dehydration_30m	Drought_3d	Heat_2h	Heat_30m	Salt_5h	Drought_8d	Heat_1.5h	Dehydration_1h	Submergence_12h	Submergence_6h	Submergence_24h		Drought_26d	Submergence_1h	Heat_45m	Heat_1h	Dehydration_1.5h	Submergence_3h	Drought_20d
OS01G0170600	Os01g0170600	OsUSP1	LOC_Os01g07590	LOC_Os01g07590	1.1508	1.1127	1.09561	1.08697	1.07925	1.06199	1.02569	1.01147	-1.07213	-1.08414	-1.08729	-1.21546	-1.251	-1.29861	-1.29991	-1.32261	-1.34077	-1.35399	-1.39808	-1.48352	-1.58166
OS01G0303800	Os01g0303800	OsUSP2	LOC_Os01g19820	LOC_Os01g19820	1.25547	-1.46823	-1.14974	-3.5235	-1.44206	-1.99009	-1.30121	-1.38745	-2.71707	-4.49216	46.3227	43.2911	30.8489	-1.99619	-1.1021	50.6629	-1.57965	-1.61082	1.25779	42.2287	-1.27351
OS01G0511100	Os01g0511100	OsUSP3	LOC_Os01g32780	LOC_Os01g32780	-1.3498	3.14998	-1.20227	73.3467	2.29237	1.12128	1.22558	-1.25163	-1.32725	2.37878	2.09162	1.6446	1.22691	2.19927	2.71393	1.56668	2.19994	1.02834	13.0228	2.45524	1.58405
OS01G0581400	Os01g0581400	OsUSP4	LOC_Os01g39970	LOC_Os01g39970	1.00285	-1.09527	1.04771	1	-1.11429	1.12589	-1.13223	-1.0297	1.20853	1.5688	1.03899	1.01949	1.01626	1.30671	-1.44634	-1.02668	1.09193	1.01566	1.1389	1.01625	1.00583
OS01G0783500	Os01g0783500	OsUSP5	LOC_Os01g57450	LOC_Os01g57450	-1.23242	1.843	1.10148	4.40778	2.10748	1.24902	1.17638	1.15425	-1.3361	1.20445	1.55345	1.07216	2.01086	1.00845	1.25465	1.04258	-1.07965	-1.55932	2.95362	1.22272	1.20589
OS01G0849600	Os01g0849600	OsUSP6	LOC_Os01g63010	LOC_Os01g63010	1.2391	1.06915	1.30472	1.14744	1.31153	-1.36824	-1.0874	1.17034	1.18451	1.12171	1.4235	1.1134	1.47928	-1.34411	1.1998	-1.17114	-1.18211	-1.2886	-1.10796	-1.29237	-1.16168
OS01G0875300	Os01g0875300	OsUSP7	LOC_Os01g65440	LOC_Os01g65440	1.04457	1.4072	1.18485	-4.7655	1.38996	-1.73226	1.24715	-1.11702	-1.95274	1.21279	-1.17036	-1.14399	1.32993	1.31549	-1.29568	-1.35024	1.27356	1.32441	1.03423	-1.57542	1.21803
OS02G0152300	Os02g0152300	OsUSP8	LOC_Os02g05820	LOC_Os02g05820	1.00929	-1.04594	1.48538	-1.19016	-1.06819	1.04827	1.09043	-1.06172	-1.04454	1.205	-1.29605	-1.09755	1.09814	-1.07043	1.08008	-1.07957	-1.1365	1.16581	-1.12432	1.06039	1.01305
OS02G0218400	Os02g0218400	OsUSP9	LOC_Os02g12660	LOC_Os02g12660	-1.15844	1.00775	1.47916	2.14813	1.79716	-1.00552	-1.10759	-1.09751	1.38122	1.13154	-1.07312	1.07561	-1.156	-1.22705	1.3086	-1.73714	-1.24655	1.17327	-1.24311	-1.32555	1.12714
OS02G0218600	Os02g0218600	OsUSP10	LOC_Os02g12670	LOC_Os02g12670	-1.03443	-1.05182	-1.36482	-1.37682	1.05151	-1.7964	1.09038	1.01658	1.0675	-1.06345	-1.9041	-1.51085	-1.65687	-1.37417	1.05687	-1.21474	-1.03733	-1.12713	1.48513	-1.83431	1.03033
OS02G0705400	Os02g0705400	OsUSP11	LOC_Os02g47650	LOC_Os02g47650	-1.27011	1.59079	1.68508	1.67409	1.14721	1.08303	1.04172	1.06392	-1.46091	1.60046	-1.01442	1.14507	1.17628	1.6654	-1.75628	1.34644	1.22	-1.67728	2.62315	-1.07235	-1.08887
OS02G0707900	Os02g0707900	OsUSP12	LOC_Os02g47840	LOC_Os02g47840	-1.31492	2.20982	1.18892	17.8533	1.34377	-1.23045	-1.04028	-1.34813	-1.13711	-1.24716	1.04517	-1.02766	-1.07785	-1.02509	1.15609	1.09816	-1.03677	1.10799	2.96887	-1.26987	1.08476
OS02G0760500	Os02g0760500	OsUSP13	LOC_Os02g52314	LOC_Os02g52314	-1.03998	-1.09415	1.18697	1.1491	-1.4826	-2.26804	1.12787	1.41701	-1.91403	-1.54724	1.267	1.12433	1.13952	-1.5319	-1.0492	1.02692	-1.58574	-1.89574	-1.33665	1.30354	1.05555
OS02G0773200	Os02g0773200	OsUSP14	LOC_Os02g53320	LOC_Os02g53320	-1.33868	2.57793	1.99698	3.78016	8.97889	45.4803	1.01747	2.9608	8.02023	1.04767	-1.24433	-1.33615	-1.49415	-1.05939	5.25701	1.15567	40.3605	19.2563	-1.41945	-1.64329	3.09882
OS02G0787200	Os02g0787200	OsUSP15	LOC_Os02g54590	LOC_Os02g54590	-1.02915	1.07339	1.26328	-1.02459	1.0567	1.22207	-1.03545	-1.03724	1.0537	1.37462	1.3777	1.09355	1.10006	-1.1454	-1.00897	-1.03337	-1.12972	1.27462	1.20384	-1.00001	1.01372
OS03G0241600	Os03g0241600	OsUSP16	LOC_Os03g13820	LOC_Os03g13820	-1.12435	-1.29313	-1.04499	-7.20433	1.01122	-2.3023	1.1799	2.04011	-1.39998	-1.37966	-1.52486	-2.01989	-1.05486	-1.87862	-1.62745	-2.35061	-1.43518	-1.71067	-1.08289	-2.00012	1.72908
OS03G0305400	Os03g0305400	OsUSP17	LOC_Os03g19270	LOC_Os03g19270	1.22749	-2.1037	-1.25355	1.63881	1.06248	-1.1821	-1.27843	1.01814	1.27125	-1.24739	98.6801	100.743	37.6037	1.79046	1.28051	82.3561	-1.04159	-1.64001	9.68987	128.767	1.11282
	Os03g0344166	OsUSP18	LOC_Os03g22390	LOC_Os03g22390	-1.03562	-1.01103	1.19146	1	1	1	1.31506	-1.11454	1	1	1	1	1.13346	-1.0749	-1.10038	1	1	1	1.1753	1.49033	-1.00469
OS03G0750000	Os03g0750000	OsUSP19	LOC_Os03g53900	LOC_Os03g53900	-1.09489	1.39808	1.08447	85.004	-1.07833	1.12052	1.13284	-1.03369	1.27926	-1.36874	1.20347	1	1	-1.40709	-1.06349	1	1.04602	-1.07126	-1.28519	1.36356	1.16235
OS03G0839900	Os03g0839900	OsUSP20	LOC_Os03g62340	LOC_Os03g62340	-1.12461	1.02587	1.00236	-1.77199	1.17868	-1.72966	1.03967	1.44994	-1.17746	1.42032	-1.54079	-1.29144	-1.39072	-1.05026	1.0594	-1.28277	-1.03693	-1.38103	1.29946	-1.45253	-1.13814
OS05G0157200	Os05g0157200	OsUSP21	LOC_Os05g06500	LOC_Os05g06500	1.1164	1.42737	1.18682	1.89597	1.50221	1.03361	1.11515	-1.7643	1.38562	-1.21048	1.15749	1.00632	1.04543	-1.30823	-1.0692	-1.06995	1.01123	-1.0211	1.09949	-1.17929	-1.06178
OS05G0170200	Os05g0170200	OsUSP22	LOC_Os05g07810	LOC_Os05g07810	-1.50094	3.76819	1.1499	14.1814	1.73306	1.9578	1.44154	-1.0355	-1.8187	1.21858	10.3812	14.6216	12.8276	-1.39506	1.74481	5.90912	1.14633	2.33568	2.63016	39.3807	1.39763
OS05G0355400	Os05g0355400	OsUSP23	LOC_Os05g28740	LOC_Os05g28740	1.07535	1.715	1.05275	6.80651	-1.77842	-1.97574	-1.09747	-5.66538	-1.29845	-2.65119	94.3046	84.379	73.7959	1.42448	2.41804	27.0826	-2.99201	-2.21198	4.48706	99.1869	3.0184
OS05G0428400	Os05g0428400	OsUSP24	LOC_Os05g35380	LOC_Os05g35380	-1.03602	1.4088	1.39082	-3.32059	1.08488	-1.40431	1.24205	1	-1.09758	-1.03917	1.62838	1.3827	1.81739	1.17173	1	1.37147	-1.408	-1.30324	1.24481	1.3181	1.03004
OS05G0453700	Os05g0453700	OsUSP25	LOC_Os05g37970	LOC_Os05g37970	-1.00521	1.37912	1.30467	1.72623	-1.03991	-1.66459	1.31193	1.14395	-2.08255	1.13032	1.84634	1.91502	2.26093	-1.34907	-1.08264	1.04931	-1.62035	-1.00292	1.22741	1.84644	1.40052
OS05G0501700	Os05g0501700	OsUSP26	LOC_Os05g42230	LOC_Os05g42230	-1.04689	1.27444	1.05716	5.73618	1.3233	-1.74941	1.15015	-1.18647	-1.96546	1.45395	1.67462	2.16151	5.82832	-1.50447	-1.06145	-1.19846	-1.56093	-1.15298	1.45194	2.02482	1.25504
OS06G0140800	Os06g0140800	OsUSP27	LOC_Os06g04880	LOC_Os06g04880	-1.12366	1.15017	1.29767	-2.45419	1.1557	-1.62545	-1.12985	-1.08901	-1.32115	-1.1883	1.96283	1.28962	-1.07081	-1.17132	-1.48695	-1.02265	-1.22116	-1.42528	1.42126	1.11252	-1.05238
OS06G0191900	Os06g0191900	OsUSP28	LOC_Os06g09230	LOC_Os06g09230	1.11121	-1.46764	-1.10265	-1.21331	1.23385	-1.25436	-1.05444	1.39409	1.00403	1.02704	-1.15345	-1.00006	-1.07126	-1.15117	1.44399	-1.15345	-1.14132	1.07577	-1.0577	-1.11983	1.74114
OS06G0574200	Os06g0574200	OsUSP29	LOC_Os06g37620	LOC_Os06g37620	1.03361	-1.24843	1.14931	-1.44315	1.08824	-1.90636	-1.23315	-1.40439	-1.48251	1.12611	1.4433	1.08657	-1.19307	-1.0783	-3.84721	-1.21203	-1.28145	-1.25735	1.38206	1.29217	-1.99152
OS07G0551400	Os07g0551400	OsUSP30	LOC_Os07g36600	LOC_Os07g36600	-1.09904	1.22417	1.02179	-1.3162	1.31695	1.64638	1.01557	1.06913	-1.14081	-1.14806	1.97069	1.58064	2.01445	-1.07262	-1.14348	1.2967	1.05205	1.13777	1.78271	1.7581	-1.08777
OS07G0673400	Os07g0673400	OsUSP31	LOC_Os07g47620	LOC_Os07g47620	1.14405	-1.14587	1.31366	-1.28037	1.02039	1.35523	-1.16804	-1.20055	1.22383	-1.45644	20.5527	29.1591	10.4253	-1.41786	-1.02354	11.5802	1.26975	-1.21827	-1.18799	89.0865	-1.35294
OS08G0249100	Os08g0249100	OsUSP32	LOC_Os08g15060	LOC_Os08g15060	-1.11304	-1.06489	1.73645	-6.29029	-1.26989	-1.99281	1.07959	1.3148	-1.6756	-1.97593	-2.20394	-2.14463	-2.31699	-1.4369	-1.05787	-2.04997	-1.60071	-1.54206	-1.86945	-3.02757	1.09461
OS09G0569800	Os09g0569800	OsUSP33	LOC_Os09g39620	LOC_Os09g39620	-1.09607	1.01744	-1.00337	-1.37645	-1.05538	-1.70037	-1.33582	-1.96265	-1.33256	1.44117	1.22358	-1.03537	-1.52586	1.30005	-22.7055	-1.13893	-1.37687	-1.30082	1.42389	1.03026	-5.55189
OS09G0570000	Os09g0570000	OsUSP34	LOC_Os09g39640	LOC_Os09g39640	-1.15885	-1.04496	1.19124	1.03885	1.02024	-2.14226	-1.18663	-1.08349	-1.78744	-1.41465	1.37777	-1.02069	-1.17624	-1.34687	-1.24492	-1.1658	-1.55232	-1.87506	-1.14543	1.02272	1.15454
OS10G0100500	Os10g0100500	OsUSP35	LOC_Os10g01060	LOC_Os10g01060	1.08705	-1.14051	1.1042	-3.22393	1.22519	-2.27213	-1.0884	-1.19979	-1.44733	1.02544	1.10187	1.02496	-1.0767	-1.40457	-1.39137	1.14989	-1.80315	-1.60682	-1.29592	1.02217	-1.18666
OS10G0437500	Os10g0437500	OsUSP36	LOC_Os10g30150	LOC_Os10g30150	1.33806	1.07071	-1.01938	5.1814	1	-1.2601	-1.18132	-1.0334	-1.41474	-1.09666	125.115	90.6582	106.198	1.00487	-1.06072	10.9907	-1.38329	-1.34333	2.18011	124.601	-1.1246
OS10G0463300	Os10g0463300	OsUSP37	LOC_Os10g32590	LOC_Os10g32590	1	1	1	1	1	1	1	-1.02672	1	1.33285	1	1	1	1	-1.1379	1	1.1143	1	1.07012	1	1
OS10G0561500	Os10g0561500	OsUSP38	LOC_Os10g41220	LOC_Os10g41220	-1.12639	-1.37141	1.01164	1.17317	1.54319	-1.26743	-1.00539	1.00989	1.01546	-1.36823	1.04675	1.1597	-1.50351	-1.54372	-1.22691	-1.19878	-1.1295	-1.09814	-1.12361	1.30589	1.03916
OS11G0194900	Os11g0194900	OsUSP39	LOC_Os11g08950	LOC_Os11g08950	-1.22861	1.15497	-1.02291	3.42874	1.87337	1.25102	-1.01333	1.20419	1.25613	1.03326	2.1978	1.17328	-1.03919	1.00363	2.0505	1.28233	2.08854	1.42426	1.87929	1.90006	1.78112
OS12G0180500	Os12g0180500	OsUSP40	LOC_Os12g07990	LOC_Os12g07990	-1.02307	1.02233	1.04787	-2.25013	1.10212	1.41474	1	-1.03812	1	-1.05722	-1.11871	-1.0976	-1.14439	1.04769	1.11562	-1.16349	1.41456	1.04916	1.07737	-1.10453	-1.04313
OS12G0181200	Os12g0181200	OsUSP41	LOC_Os12g08060	LOC_Os12g08060	-1.02322	1.02654	1.53311	-1.28915	1.07111	1	1.01989	-1.02671	-1.03187	1.38991	-1.66855	-1.07797	-1.87457	1.0434	-1.0162	-1.29134	-1.08568	-1.08026	1.02781	-1.05369	1.00981
OS12G0501400	Os12g0501400	OsUSP42	LOC_Os12g31710	LOC_Os12g31710	1.00583	1.22288	1.16336	1	1	1	1.0663	1	1	1.38405	-1.4864	-1.33333	1.04399	1.06415	1	-1.13604	1.1143	1	1.08462	-1.55345	-1.04005
OS12G0552400	Os12g0552400	OsUSP43	LOC_Os12g36630	LOC_Os12g36630	-1.1476	2.08974	1.58774	2.03896	-1.64364	1.72987	1.27081	-1.13331	1.18962	-1.01252	4.53281	2.42378	3.51092	1.84856	-1.0204	2.61	-1.91748	-1.16497	3.54474	2.28916	1.28967
OS12G0552500	Os12g0552500	OsUSP44	LOC_Os12g36640	LOC_Os12g36640	-1.07586	1.43373	-1.2192	3.5005	1.6918	1.43714	1.16207	1.02676	1.21085	-2.03156	2.81545	2.24737	2.71566	-1.15946	1.43656	1.71799	1.28612	1.02447	1.64727	2.04376	1.17809

## Sheet: adjusted_for_scale_final
MSU_ID (Old)	Final IDs	Salt_1h	Salt_5h	Salt_24h	Drought_3d	Drought_8d	Drought_20d	Drought_26d	Dehydration_30m	Dehydration_1h	Dehydration_1.5h	Heat_30m	Heat_45m	Heat_1h	Heat_1.5h	Heat_2h	Submergence_1h	Submergence_3h	Submergence_6h	Submergence_12h	Submergence_24h
LOC_Os01g07590	OsUSP1	1.1508	1.02569	1.1127	1.08697	1.01147	-1.58166	-1.29991	1.09561	-1.08414	-1.29861	1.06199	-1.34077	-1.35399	-1.07213	1.07925	-1.32261	-1.48352	-1.21546	-1.08729	-1.251
LOC_Os01g19820	OsUSP2	1.25547	-1.30121	-1.46823	-3.5235	-1.38745	-1.27351	-1.1021	-1.14974	-4.49216	-1.99619	-1.99009	-1.57965	-1.61082	-2.71707	-1.44206	6	6	6	6	6
LOC_Os01g32780	OsUSP3	-1.3498	1.22558	3.14998	6	-1.25163	1.58405	2.71393	-1.20227	2.37878	2.19927	1.12128	2.19994	1.02834	-1.32725	2.29237	1.56668	2.45524	1.6446	2.09162	1.22691
LOC_Os01g39970	OsUSP4	1.00285	-1.13223	-1.09527	1	-1.0297	1.00583	-1.44634	1.04771	1.5688	1.30671	1.12589	1.09193	1.01566	1.20853	-1.11429	-1.02668	1.01625	1.01949	1.03899	1.01626
LOC_Os01g57450	OsUSP5	-1.23242	1.17638	1.843	4.40778	1.15425	1.20589	1.25465	1.10148	1.20445	1.00845	1.24902	-1.07965	-1.55932	-1.3361	2.10748	1.04258	1.22272	1.07216	1.55345	2.01086
LOC_Os01g63010	OsUSP6	1.2391	-1.0874	1.06915	1.14744	1.17034	-1.16168	1.1998	1.30472	1.12171	-1.34411	-1.36824	-1.18211	-1.2886	1.18451	1.31153	-1.17114	-1.29237	1.1134	1.4235	1.47928
LOC_Os01g65440	OsUSP7	1.04457	1.24715	1.4072	-4.7655	-1.11702	1.21803	-1.29568	1.18485	1.21279	1.31549	-1.73226	1.27356	1.32441	-1.95274	1.38996	-1.35024	-1.57542	-1.14399	-1.17036	1.32993
LOC_Os02g05820	OsUSP8	1.00929	1.09043	-1.04594	-1.19016	-1.06172	1.01305	1.08008	1.48538	1.205	-1.07043	1.04827	-1.1365	1.16581	-1.04454	-1.06819	-1.07957	1.06039	-1.09755	-1.29605	1.09814
LOC_Os02g12660	OsUSP9	-1.15844	-1.10759	1.00775	2.14813	-1.09751	1.12714	1.3086	1.47916	1.13154	-1.22705	-1.00552	-1.24655	1.17327	1.38122	1.79716	-1.73714	-1.32555	1.07561	-1.07312	-1.156
LOC_Os02g12670	OsUSP10	-1.03443	1.09038	-1.05182	-1.37682	1.01658	1.03033	1.05687	-1.36482	-1.06345	-1.37417	-1.7964	-1.03733	-1.12713	1.0675	1.05151	-1.21474	-1.83431	-1.51085	-1.9041	-1.65687
LOC_Os02g47650	OsUSP11	-1.27011	1.04172	1.59079	1.67409	1.06392	-1.08887	-1.75628	1.68508	1.60046	1.6654	1.08303	1.22	-1.67728	-1.46091	1.14721	1.34644	-1.07235	1.14507	-1.01442	1.17628
LOC_Os02g47840	OsUSP12	-1.31492	-1.04028	2.20982	6	-1.34813	1.08476	1.15609	1.18892	-1.24716	-1.02509	-1.23045	-1.03677	1.10799	-1.13711	1.34377	1.09816	-1.26987	-1.02766	1.04517	-1.07785
LOC_Os02g52314	OsUSP13	-1.03998	1.12787	-1.09415	1.1491	1.41701	1.05555	-1.0492	1.18697	-1.54724	-1.5319	-2.26804	-1.58574	-1.89574	-1.91403	-1.4826	1.02692	1.30354	1.12433	1.267	1.13952
LOC_Os02g53320	OsUSP14	-1.33868	1.01747	2.57793	3.78016	2.9608	3.09882	5.25701	1.99698	1.04767	-1.05939	6	6	6	6	6	1.15567	-1.64329	-1.33615	-1.24433	-1.49415
LOC_Os02g54590	OsUSP15	-1.02915	-1.03545	1.07339	-1.02459	-1.03724	1.01372	-1.00897	1.26328	1.37462	-1.1454	1.22207	-1.12972	1.27462	1.0537	1.0567	-1.03337	-1.00001	1.09355	1.3777	1.10006
LOC_Os03g13820	OsUSP16	-1.12435	1.1799	-1.29313	-6	2.04011	1.72908	-1.62745	-1.04499	-1.37966	-1.87862	-2.3023	-1.43518	-1.71067	-1.39998	1.01122	-2.35061	-2.00012	-2.01989	-1.52486	-1.05486
LOC_Os03g19270	OsUSP17	1.22749	-1.27843	-2.1037	1.63881	1.01814	1.11282	1.28051	-1.25355	-1.24739	1.79046	-1.1821	-1.04159	-1.64001	1.27125	1.06248	6	6	6	6	6
LOC_Os03g22390	OsUSP18	-1.03562	1.31506	-1.01103	1	-1.11454	-1.00469	-1.10038	1.19146	1	-1.0749	1	1	1	1	1	1	1.49033	1	1	1.13346
LOC_Os03g53900	OsUSP19	-1.09489	1.13284	1.39808	6	-1.03369	1.16235	-1.06349	1.08447	-1.36874	-1.40709	1.12052	1.04602	-1.07126	1.27926	-1.07833	1	1.36356	1	1.20347	1
LOC_Os03g62340	OsUSP20	-1.12461	1.03967	1.02587	-1.77199	1.44994	-1.13814	1.0594	1.00236	1.42032	-1.05026	-1.72966	-1.03693	-1.38103	-1.17746	1.17868	-1.28277	-1.45253	-1.29144	-1.54079	-1.39072
LOC_Os05g06500	OsUSP21	1.1164	1.11515	1.42737	1.89597	-1.7643	-1.06178	-1.0692	1.18682	-1.21048	-1.30823	1.03361	1.01123	-1.0211	1.38562	1.50221	-1.06995	-1.17929	1.00632	1.15749	1.04543
LOC_Os05g07810	OsUSP22	-1.50094	1.44154	3.76819	6	-1.0355	1.39763	1.74481	1.1499	1.21858	-1.39506	1.9578	1.14633	2.33568	-1.8187	1.73306	5.90912	6	6	6	6
LOC_Os05g28740	OsUSP23	1.07535	-1.09747	1.715	6	-5.66538	3.0184	2.41804	1.05275	-2.65119	1.42448	-1.97574	-2.99201	-2.21198	-1.29845	-1.77842	6	6	6	6	6
LOC_Os05g35380	OsUSP24	-1.03602	1.24205	1.4088	-3.32059	1	1.03004	1	1.39082	-1.03917	1.17173	-1.40431	-1.408	-1.30324	-1.09758	1.08488	1.37147	1.3181	1.3827	1.62838	1.81739
LOC_Os05g37970	OsUSP25	-1.00521	1.31193	1.37912	1.72623	1.14395	1.40052	-1.08264	1.30467	1.13032	-1.34907	-1.66459	-1.62035	-1.00292	-2.08255	-1.03991	1.04931	1.84644	1.91502	1.84634	2.26093
LOC_Os05g42230	OsUSP26	-1.04689	1.15015	1.27444	5.73618	-1.18647	1.25504	-1.06145	1.05716	1.45395	-1.50447	-1.74941	-1.56093	-1.15298	-1.96546	1.3233	-1.19846	2.02482	2.16151	1.67462	5.82832
LOC_Os06g04880	OsUSP27	-1.12366	-1.12985	1.15017	-2.45419	-1.08901	-1.05238	-1.48695	1.29767	-1.1883	-1.17132	-1.62545	-1.22116	-1.42528	-1.32115	1.1557	-1.02265	1.11252	1.28962	1.96283	-1.07081
LOC_Os06g09230	OsUSP28	1.11121	-1.05444	-1.46764	-1.21331	1.39409	1.74114	1.44399	-1.10265	1.02704	-1.15117	-1.25436	-1.14132	1.07577	1.00403	1.23385	-1.15345	-1.11983	-1.00006	-1.15345	-1.07126
LOC_Os06g37620	OsUSP29	1.03361	-1.23315	-1.24843	-1.44315	-1.40439	-1.99152	-3.84721	1.14931	1.12611	-1.0783	-1.90636	-1.28145	-1.25735	-1.48251	1.08824	-1.21203	1.29217	1.08657	1.4433	-1.19307
LOC_Os07g36600	OsUSP30	-1.09904	1.01557	1.22417	-1.3162	1.06913	-1.08777	-1.14348	1.02179	-1.14806	-1.07262	1.64638	1.05205	1.13777	-1.14081	1.31695	1.2967	1.7581	1.58064	1.97069	2.01445
LOC_Os07g47620	OsUSP31	1.14405	-1.16804	-1.14587	-1.28037	-1.20055	-1.35294	-1.02354	1.31366	-1.45644	-1.41786	1.35523	1.26975	-1.21827	1.22383	1.02039	6	6	6	6	6
LOC_Os08g15060	OsUSP32	-1.11304	1.07959	-1.06489	-6	1.3148	1.09461	-1.05787	1.73645	-1.97593	-1.4369	-1.99281	-1.60071	-1.54206	-1.6756	-1.26989	-2.04997	-3.02757	-2.14463	-2.20394	-2.31699
LOC_Os09g39620	OsUSP33	-1.09607	-1.33582	1.01744	-1.37645	-1.96265	-5.55189	-6	-1.00337	1.44117	1.30005	-1.70037	-1.37687	-1.30082	-1.33256	-1.05538	-1.13893	1.03026	-1.03537	1.22358	-1.52586
LOC_Os09g39640	OsUSP34	-1.15885	-1.18663	-1.04496	1.03885	-1.08349	1.15454	-1.24492	1.19124	-1.41465	-1.34687	-2.14226	-1.55232	-1.87506	-1.78744	1.02024	-1.1658	1.02272	-1.02069	1.37777	-1.17624
LOC_Os10g01060	OsUSP35	1.08705	-1.0884	-1.14051	-3.22393	-1.19979	-1.18666	-1.39137	1.1042	1.02544	-1.40457	-2.27213	-1.80315	-1.60682	-1.44733	1.22519	1.14989	1.02217	1.02496	1.10187	-1.0767
LOC_Os10g30150	OsUSP36	1.33806	-1.18132	1.07071	5.1814	-1.0334	-1.1246	-1.06072	-1.01938	-1.09666	1.00487	-1.2601	-1.38329	-1.34333	-1.41474	1	6	6	6	6	6
LOC_Os10g32590	OsUSP37	1	1	1	1	-1.02672	1	-1.1379	1	1.33285	1	1	1.1143	1	1	1	1	1	1	1	1
LOC_Os10g41220	OsUSP38	-1.12639	-1.00539	-1.37141	1.17317	1.00989	1.03916	-1.22691	1.01164	-1.36823	-1.54372	-1.26743	-1.1295	-1.09814	1.01546	1.54319	-1.19878	1.30589	1.1597	1.04675	-1.50351
LOC_Os11g08950	OsUSP39	-1.22861	-1.01333	1.15497	3.42874	1.20419	1.78112	2.0505	-1.02291	1.03326	1.00363	1.25102	2.08854	1.42426	1.25613	1.87337	1.28233	1.90006	1.17328	2.1978	-1.03919
LOC_Os12g07990	OsUSP40	-1.02307	1	1.02233	-2.25013	-1.03812	-1.04313	1.11562	1.04787	-1.05722	1.04769	1.41474	1.41456	1.04916	1	1.10212	-1.16349	-1.10453	-1.0976	-1.11871	-1.14439
LOC_Os12g08060	OsUSP41	-1.02322	1.01989	1.02654	-1.28915	-1.02671	1.00981	-1.0162	1.53311	1.38991	1.0434	1	-1.08568	-1.08026	-1.03187	1.07111	-1.29134	-1.05369	-1.07797	-1.66855	-1.87457
LOC_Os12g31710	OsUSP42	1.00583	1.0663	1.22288	1	1	-1.04005	1	1.16336	1.38405	1.06415	1	1.1143	1	1	1	-1.13604	-1.55345	-1.33333	-1.4864	1.04399
LOC_Os12g36630	OsUSP43	-1.1476	1.27081	2.08974	2.03896	-1.13331	1.28967	-1.0204	1.58774	-1.01252	1.84856	1.72987	-1.91748	-1.16497	1.18962	-1.64364	2.61	2.28916	2.42378	4.53281	3.51092
LOC_Os12g36640	OsUSP44	-1.07586	1.16207	1.43373	3.5005	1.02676	1.17809	1.43656	-1.2192	-2.03156	-1.15946	1.43714	1.28612	1.02447	1.21085	1.6918	1.71799	2.04376	2.24737	2.81545	2.71566
