# Supplementary material for: Comprehensive in silico Characterization of Universal Stress Proteins in Rice (Oryza sativa L.) With Insight Into Their Stress-Specific Transcriptional Modulation
Source: Front Plant Sci. 2021 Jul 28;12:712607. doi: 10.3389/fpls.2021.712607 (PMC8355530; doi:10.3389/fpls.2021.712607)
Supplement: Supplementary file 6 [file Table_4.XLS]

## Sheet: Plate 1
Block Type	96fast
Chemistry	SYBR_GREEN
Experiment File Name	D:\Users\usp_rICE_PLATE2.eds
Experiment Run End Time	2017-11-18 15:44:52 PM PST
Instrument Type	sds7500fast
Passive Reference	ROX
Well	Sample Name		Target Name	Task	Reporter	Quencher	RQ	RQ Min	RQ Max	Cт	Cт Mean	Cт SD	ΔCт	ΔCт Mean	ΔCт SE	HK Control ΔCт Mean		HK Control ΔCт SE	ΔΔCт	Automatic Ct Threshold	Ct Threshold	Automatic Baseline	Baseline Start	Baseline End	Efficiency	Tm1	Tm2	Tm3	Comments	AMPNC	HIGHSD	NOAMP	OUTLIERRG	EXPFAIL	MTP
A1	Sample 1	Control	eEF	UNKNOWN	SYBR	None				24.5099	24.5853	0.180434								TRUE	0.281323	TRUE	3	16	1	80.5293				N	N	N	N	N	N
A2	Sample 2	Salt	eEF	UNKNOWN	SYBR	None				23.9188	24.2164	0.417097								TRUE	0.281323	TRUE	3	14	1	80.7026				N	N	N	N	N	N
A3	Sample 3	Drought	eEF	UNKNOWN	SYBR	None				25.6937	25.9423	0.228502								TRUE	0.281323	TRUE	3	15	1	80.8759				N	N	N	N	N	N
A4	Sample 4	Cold	eEF	UNKNOWN	SYBR	None				25.9905	26.2745	0.269606								TRUE	0.281323	TRUE	3	15	1	80.8759				N	Y	N	N	N	N
A5	Sample 5	Heat	eEF	UNKNOWN	SYBR	None				27.3924	28.0039	0.544506								TRUE	0.281323	TRUE	3	17	1	81.0492				N	N	N	N	N	N
A6	Sample 6	Dehydration	eEF	UNKNOWN	SYBR	None				21.963	22.4923	0.515067								TRUE	0.281323	TRUE	3	10	1	81.0492				N	N	N	N	N	N
A7	Sample 7	H2O2	eEF	UNKNOWN	SYBR	None				21.4956	22.0167	0.48133								TRUE	0.281323	TRUE	3	11	1	81.2225				N	Y	N	N	N	N
A8	Sample 8	ABA	eEF	UNKNOWN	SYBR	None				27.2864	27.1562	0.493172								TRUE	0.281323	TRUE	3	26	1	81.0492				N	Y	N	N	N	N
A9	Sample 9	SA	eEF	UNKNOWN	SYBR	None				24.8805	24.5308	0.729147								TRUE	0.281323	TRUE	3	12	1	80.0094				N	Y	N	N	N	N
A10	Sample 10	JA3	eEF	UNKNOWN	SYBR	None				25.9923	25.4903	0.437934								TRUE	0.281323	TRUE	3	9	1	81.0492				N	Y	N	N	N	N
A11	Sample 1	Control	USP2	UNKNOWN	SYBR	None	1	0.779385	1.28306	23.7279	23.5766	0.185131		-1.24243	0.129515				0	TRUE	0.0571792	TRUE	3	16	1	87.8078	80.7026			N	N	N	N	N	Y
A12	Sample 2	Salt	USP2	UNKNOWN	SYBR	None	0.124195	0.101851	0.151439	21.1217	20.9544	0.151915		1.7669	0.10306				3.00933	TRUE	0.0571792	TRUE	3	18	1	87.9811				N	N	N	N	N	N
B1	Sample 1	Control	eEF	UNKNOWN	SYBR	None				24.4548	24.5853	0.180434								TRUE	0.281323	TRUE	3	15	1	80.7026				N	N	N	N	N	N
B2	Sample 2	Salt	eEF	UNKNOWN	SYBR	None				24.0374	24.2164	0.417097								TRUE	0.281323	TRUE	3	14	1	80.8759				N	N	N	N	N	N
B3	Sample 3	Drought	eEF	UNKNOWN	SYBR	None				25.9902	25.9423	0.228502								TRUE	0.281323	TRUE	3	15	1	81.0492				N	N	N	N	N	N
B4	Sample 4	Cold	eEF	UNKNOWN	SYBR	None				26.3059	26.2745	0.269606								TRUE	0.281323	TRUE	3	17	1	81.0492				N	Y	N	N	N	N
B5	Sample 5	Heat	eEF	UNKNOWN	SYBR	None				28.4365	28.0039	0.544506								TRUE	0.281323	TRUE	3	17	1	81.2225				N	N	N	N	N	N
B6	Sample 6	Dehydration	eEF	UNKNOWN	SYBR	None				22.5221	22.4923	0.515067								TRUE	0.281323	TRUE	3	11	1	81.2225				N	N	N	N	N	N
B7	Sample 7	H2O2	eEF	UNKNOWN	SYBR	None				22.1097	22.0167	0.48133								TRUE	0.281323	TRUE	3	12	1	81.2225				N	Y	N	N	N	N
B8	Sample 8	ABA	eEF	UNKNOWN	SYBR	None				26.611	27.1562	0.493172								TRUE	0.281323	TRUE	3	27	1	79.8361				N	Y	N	N	N	N
B9	Sample 9	SA	eEF	UNKNOWN	SYBR	None				23.6927	24.5308	0.729147								TRUE	0.281323	TRUE	3	12	1	81.0492				N	Y	N	N	N	N
B10	Sample 10	JA3	eEF	UNKNOWN	SYBR	None				25.2924	25.4903	0.437934								TRUE	0.281323	TRUE	3	13	1	81.2225				N	Y	N	N	N	N
B11	Sample 1	Control	USP2	UNKNOWN	SYBR	None	1	0.779385	1.28306	23.3702	23.5766	0.185131		-1.24243	0.129515				0	TRUE	0.0571792	TRUE	3	16	1	87.9811	80.8759			N	N	N	N	N	Y
B12	Sample 2	Salt	USP2	UNKNOWN	SYBR	None	0.124195	0.101851	0.151439	20.8251	20.9544	0.151915		1.7669	0.10306				3.00933	TRUE	0.0571792	TRUE	3	18	1	88.1544				N	N	N	N	N	N
C1	Sample 1	Control	eEF	UNKNOWN	SYBR	None				24.7912	24.5853	0.180434								TRUE	0.281323	TRUE	3	16	1	80.7026				N	N	N	N	N	N
C2	Sample 2	Salt	eEF	UNKNOWN	SYBR	None				24.6932	24.2164	0.417097								TRUE	0.281323	TRUE	3	14	1	81.0492				N	N	N	N	N	N
C3	Sample 3	Drought	eEF	UNKNOWN	SYBR	None				26.1431	25.9423	0.228502								TRUE	0.281323	TRUE	3	15	1	81.2225				N	N	N	N	N	N
C4	Sample 4	Cold	eEF	UNKNOWN	SYBR	None				26.527	26.2745	0.269606								TRUE	0.281323	TRUE	3	17	1	80.1827				N	Y	N	N	N	N
C5	Sample 5	Heat	eEF	UNKNOWN	SYBR	None				28.1826	28.0039	0.544506								TRUE	0.281323	TRUE	3	17	1	81.2225				N	N	N	N	N	N
C6	Sample 6	Dehydration	eEF	UNKNOWN	SYBR	None				22.9919	22.4923	0.515067								TRUE	0.281323	TRUE	3	11	1	81.3958				N	N	N	N	N	N
C7	Sample 7	H2O2	eEF	UNKNOWN	SYBR	None				22.4447	22.0167	0.48133								TRUE	0.281323	TRUE	3	12	1	81.3958				N	Y	N	N	N	N
C8	Sample 8	ABA	eEF	UNKNOWN	SYBR	None				27.5712	27.1562	0.493172								TRUE	0.281323	TRUE	3	29	1	79.8361				N	Y	N	N	N	N
C9	Sample 9	SA	eEF	UNKNOWN	SYBR	None				25.0193	24.5308	0.729147								TRUE	0.281323	TRUE	3	12	1	81.2225				N	Y	N	N	N	N
C10	Sample 10	JA3	eEF	UNKNOWN	SYBR	None				25.1863	25.4903	0.437934								TRUE	0.281323	TRUE	3	12	1	81.2225				N	Y	N	N	N	N
C11	Sample 1	Control	USP2	UNKNOWN	SYBR	None	1	0.779385	1.28306	23.6318	23.5766	0.185131		-1.24243	0.129515				0	TRUE	0.0571792	TRUE	3	16	1	87.9811	80.8759			N	N	N	N	N	Y
C12	Sample 2	Salt	USP2	UNKNOWN	SYBR	None	0.124195	0.101851	0.151439	20.9163	20.9544	0.151915		1.7669	0.10306				3.00933	TRUE	0.0571792	TRUE	3	18	1	88.1544				N	N	N	N	N	N
D1	Sample 1	Control	USP1	UNKNOWN	SYBR	None				Undetermined										TRUE	0.0283192	TRUE	3	39	1	61.9864				N	N	Y	N	Y	N
D2	Sample 2	Salt	USP1	UNKNOWN	SYBR	None				Undetermined										TRUE	0.0283192	TRUE	3	19	1	74.1173				N	N	N	N	N	N
D3	Sample 3	Drought	USP1	UNKNOWN	SYBR	None				39.2104	37.9427	1.79279		17.6052	1.26841					TRUE	0.0283192	TRUE	3	35	1	72.9042	81.2225	61.9864		N	Y	N	N	N	Y
D4	Sample 4	Cold	USP1	UNKNOWN	SYBR	None				Undetermined										TRUE	0.0283192	TRUE	3	39	1	76.5435				N	N	N	N	Y	N
D5	Sample 5	Heat	USP1	UNKNOWN	SYBR	None				Undetermined										TRUE	0.0283192	TRUE	3	39	1	61.6398				N	N	Y	N	Y	N
D6	Sample 6	Dehydration	USP1	UNKNOWN	SYBR	None				Undetermined										TRUE	0.0283192	TRUE	3	39	1	69.6115	80.356	85.9016		N	N	N	N	Y	Y
D7	Sample 7	H2O2	USP1	UNKNOWN	SYBR	None				33.5666	33.5666			15.9132						TRUE	0.0283192	TRUE	3	31	1	82.6089	78.7963			N	N	N	N	N	Y
D8	Sample 8	ABA	USP1	UNKNOWN	SYBR	None				33.5893	33.7632	0.245925		0.170345	0.662867					TRUE	0.0283192	TRUE	3	30	1	81.3958	67.1853			N	N	N	N	N	Y
D9	Sample 9	SA	USP1	UNKNOWN	SYBR	None				Undetermined	37.1038			19.2815						TRUE	0.0283192	TRUE	3	39	1	67.1853				N	N	N	N	Y	N
D10	Sample 10	JA3	USP1	UNKNOWN	SYBR	None				Undetermined										TRUE	0.0283192	TRUE	3	6	1	61.8131				N	N	N	N	N	N
D11	Sample 3	Drought	USP2	UNKNOWN	SYBR	None	0.0311126	0.000603231	1.60468	21.9634	24.1015	3.54803		3.76393	2.0489				5.00636	TRUE	0.0571792	TRUE	3	18	1	87.8078				N	Y	N	N	N	N
D12	Sample 4	Cold	USP2	UNKNOWN	SYBR	None	0.00873976	9.01299e-07	84.7482	36.8753	27.4145	8.24054		5.59576	4.76988				6.83819	TRUE	0.0571792	TRUE	3	33	1	80.0094	71.8644			N	Y	N	N	N	Y
E1	Sample 1	Control	USP1	UNKNOWN	SYBR	None				Undetermined										TRUE	0.0283192	TRUE	3	39	1	61.8131	78.4497	88.1544		N	N	N	N	Y	Y
E2	Sample 2	Salt	USP1	UNKNOWN	SYBR	None				Undetermined										TRUE	0.0283192	TRUE	3	39	1	66.6654	61.6398	81.3958		N	N	Y	N	Y	Y
E3	Sample 3	Drought	USP1	UNKNOWN	SYBR	None				Undetermined	37.9427	1.79279		17.6052	1.26841					TRUE	0.0283192	TRUE	3	39	1	61.8131	78.1031	66.4921		N	N	Y	N	Y	Y
E4	Sample 4	Cold	USP1	UNKNOWN	SYBR	None				Undetermined										TRUE	0.0283192	TRUE	3	39	1	68.3984				N	N	N	N	Y	N
E5	Sample 5	Heat	USP1	UNKNOWN	SYBR	None				Undetermined										TRUE	0.0283192	TRUE	3	6	1	62.1597				N	N	N	N	N	N
E6	Sample 6	Dehydration	USP1	UNKNOWN	SYBR	None				Undetermined										TRUE	0.0283192	TRUE	3	39	1	67.8785				N	N	N	N	Y	N
E7	Sample 7	H2O2	USP1	UNKNOWN	SYBR	None				Undetermined	33.5666			15.9132						TRUE	0.0283192	TRUE	3	39	1	61.6398				N	N	N	N	Y	N
E8	Sample 8	ABA	USP1	UNKNOWN	SYBR	None				33.9371	33.7632	0.245925		0.170345	0.662867					TRUE	0.0283192	TRUE	3	31	1	81.0492	68.3984			N	N	N	N	N	Y
E9	Sample 9	SA	USP1	UNKNOWN	SYBR	None				Undetermined	37.1038			19.2815						TRUE	0.0283192	TRUE	3	39	1	61.6398				N	N	Y	N	Y	N
E10	Sample 10	JA3	USP1	UNKNOWN	SYBR	None				Undetermined										TRUE	0.0283192	TRUE	3	6	1	65.1058				N	N	N	N	N	N
E11	Sample 3	Drought	USP2	UNKNOWN	SYBR	None	0.0311126	0.000603231	1.60468	22.1439	24.1015	3.54803		3.76393	2.0489				5.00636	TRUE	0.0571792	TRUE	3	19	1	88.3277				N	Y	N	N	N	N
E12	Sample 4	Cold	USP2	UNKNOWN	SYBR	None	0.00873976	9.01299e-07	84.7482	23.5657	27.4145	8.24054		5.59576	4.76988				6.83819	TRUE	0.0571792	TRUE	3	20	1	87.4613				N	Y	N	N	N	N
F1	Sample 1	Control	USP1	UNKNOWN	SYBR	None				Undetermined										TRUE	0.0283192	TRUE	3	38	1	61.6398	79.4895	85.9016		N	N	N	N	Y	Y
F2	Sample 2	Salt	USP1	UNKNOWN	SYBR	None				Undetermined										TRUE	0.0283192	TRUE	3	39	1	61.8131				N	N	N	N	Y	N
F3	Sample 3	Drought	USP1	UNKNOWN	SYBR	None				36.675	37.9427	1.79279		17.6052	1.26841					TRUE	0.0283192	TRUE	3	34	1	75.8503				N	Y	N	N	N	N
F4	Sample 4	Cold	USP1	UNKNOWN	SYBR	None				Undetermined										TRUE	0.0283192	TRUE	3	39	1	62.5063	80.0094	73.0775		N	N	Y	N	Y	Y
F5	Sample 5	Heat	USP1	UNKNOWN	SYBR	None				Undetermined										TRUE	0.0283192	TRUE	3	39	1	81.0492	61.9864	84.8618		N	N	Y	N	Y	Y
F6	Sample 6	Dehydration	USP1	UNKNOWN	SYBR	None				Undetermined										TRUE	0.0283192	TRUE	3	39	1	61.8131	82.4356	76.1969		N	N	Y	N	Y	Y
F7	Sample 7	H2O2	USP1	UNKNOWN	SYBR	None				Undetermined	33.5666			15.9132						TRUE	0.0283192	TRUE	3	39	1	61.9864				N	N	Y	N	Y	N
F8	Sample 8	ABA	USP1	UNKNOWN	SYBR	None				Undetermined	33.7632	0.245925		0.170345	0.662867					TRUE	0.0283192	TRUE	3	39	1	61.9864				N	N	Y	N	Y	N
F9	Sample 9	SA	USP1	UNKNOWN	SYBR	None				37.1038	37.1038			19.2815						TRUE	0.0283192	TRUE	3	35	1	81.0492				N	N	N	N	N	N
F10	Sample 10	JA3	USP1	UNKNOWN	SYBR	None				Undetermined										TRUE	0.0283192	TRUE	3	39	1	64.9325				N	N	N	N	Y	N
F11	Sample 3	Drought	USP2	UNKNOWN	SYBR	None	0.0311126	0.000603231	1.60468	22.197	24.1015	3.54803		3.76393	2.0489				5.00636	TRUE	0.0571792	TRUE	3	25	1	86.9414	79.8361			N	Y	N	Y	N	Y
F12	Sample 4	Cold	USP2	UNKNOWN	SYBR	None	0.00873976	9.01299e-07	84.7482	21.8026	27.4145	8.24054		5.59576	4.76988				6.83819	TRUE	0.0571792	TRUE	3	19	1	88.1544				N	Y	N	N	N	N
G1	Sample 5	Heat	USP2	UNKNOWN	SYBR	None	0.588568	0.38966	0.889011	22.6758	23.0895	0.364875		-0.477713	0.2143				0.764718	TRUE	0.0571792	TRUE	3	19	1	87.8078				N	N	N	N	N	N
G2	Sample 5	Heat	USP2	UNKNOWN	SYBR	None	0.588568	0.38966	0.889011	23.2271	23.0895	0.364875		-0.477713	0.2143				0.764718	TRUE	0.0571792	TRUE	3	20	1	87.9811				N	N	N	N	N	N
G3	Sample 5	Heat	USP2	UNKNOWN	SYBR	None	0.588568	0.38966	0.889011	23.3655	23.0895	0.364875		-0.477713	0.2143				0.764718	TRUE	0.0571792	TRUE	3	20	1	88.1544				N	N	N	N	N	N
G4	Sample 7	H2O2	USP2	UNKNOWN	SYBR	None	0.00906023	0.00395961	0.0207313	23.2999	23.1971	0.534438		5.54381	0.430115				6.78624	TRUE	0.0571792	TRUE	3	20	1	88.1544				N	Y	N	N	N	N
G5	Sample 7	H2O3	USP2	UNKNOWN	SYBR	None	0.00906023	0.00395961	0.0207313	23.6727	23.1971	0.534438		5.54381	0.430115				6.78624	TRUE	0.0571792	TRUE	3	20	1	88.1544				N	Y	N	N	N	N
G6	Sample 7	H2O4	USP2	UNKNOWN	SYBR	None	0.00906023	0.00395961	0.0207313	22.6188	23.1971	0.534438		5.54381	0.430115				6.78624	TRUE	0.0571792	TRUE	3	20	1	87.9811				N	Y	N	N	N	N
G7	Sample 9	SA	USP2	UNKNOWN	SYBR	None	0.420639	0.120219	1.47179	22.7563	21.8293	0.837123		0.00691477	0.650802				1.24935	TRUE	0.0571792	TRUE	3	15	1	87.9811				N	Y	N	N	N	N
G8	Sample 9	SA	USP2	UNKNOWN	SYBR	None	0.420639	0.120219	1.47179	21.1287	21.8293	0.837123		0.00691477	0.650802				1.24935	TRUE	0.0571792	TRUE	3	12	1	87.8078				N	Y	N	N	N	N
G9	Sample 9	SA	USP2	UNKNOWN	SYBR	None	0.420639	0.120219	1.47179	21.6028	21.8293	0.837123		0.00691477	0.650802				1.24935	TRUE	0.0571792	TRUE	3	14	1	88.1544				N	Y	N	N	N	N
G10	Sample 1		usp3	NTC	SYBR	None				Undetermined										TRUE	0.281323	TRUE	3	14	1	78.9696				Y	N	N	N	N	N
G11	Sample 1		usp3	NTC	SYBR	None				Undetermined										TRUE	0.0283192	TRUE	3	13	1	79.3162				Y	N	N	N	N	N
G12	Sample 1		usp3	NTC	SYBR	None				Undetermined										TRUE	0.0571792	TRUE	3	13	1	79.1429				Y	N	N	N	N	N
H1	Sample 6	Dehydration	USP2	UNKNOWN	SYBR	None	0.0305415	0.0126864	0.073526	20.4912	20.1107	0.770406		3.79066	0.456514				5.03309	TRUE	0.0571792	TRUE	3	18	1	87.8078				N	Y	N	N	N	N
H2	Sample 6	Dehydration	USP2	UNKNOWN	SYBR	None	0.0305415	0.0126864	0.073526	19.2241	20.1107	0.770406		3.79066	0.456514				5.03309	TRUE	0.0571792	TRUE	3	16	1	87.8078				N	Y	N	N	N	N
H3	Sample 6	Dehydration	USP2	UNKNOWN	SYBR	None	0.0305415	0.0126864	0.073526	20.6169	20.1107	0.770406		3.79066	0.456514				5.03309	TRUE	0.0571792	TRUE	3	17	1	87.9811				N	Y	N	N	N	N
H4	Sample 8	ABA	USP2	UNKNOWN	SYBR	None	595.499	84.4785	4197.75	22.6639	23.1325	1.36448		-10.4604	1.01477				-9.21796	TRUE	0.0571792	TRUE	3	19	1	87.6346	80.8759			N	Y	N	N	N	Y
H5	Sample 8	ABA	USP2	UNKNOWN	SYBR	None	595.499	84.4785	4197.75	24.6695	23.1325	1.36448		-10.4604	1.01477				-9.21796	TRUE	0.0571792	TRUE	3	21	1	87.8078	81.0492			N	Y	N	N	N	Y
H6	Sample 8	ABA	USP2	UNKNOWN	SYBR	None	595.499	84.4785	4197.75	22.064	23.1325	1.36448		-10.4604	1.01477				-9.21796	TRUE	0.0571792	TRUE	3	19	1	87.6346	80.8759			N	Y	N	N	N	Y
H7	Sample 10	JA3	USP2	UNKNOWN	SYBR	None	0.124931	0.0309693	0.503976	20.4798	20.912	0.375832		1.75836	0.724747				3.00079	TRUE	0.0571792	TRUE	3	15	1	88.1544				N	N	N	N	N	N
H8	Sample 10	JA4	USP2	UNKNOWN	SYBR	None	0.124931	0.0309693	0.503976	21.1614	20.912	0.375832		1.75836	0.724747				3.00079	TRUE	0.0571792	TRUE	3	16	1	88.1544				N	N	N	N	N	N
H9	Sample 10	JA5	USP2	UNKNOWN	SYBR	None	0.124931	0.0309693	0.503976	21.0949	20.912	0.375832		1.75836	0.724747				3.00079	TRUE	0.0571792	TRUE	3	16	1	87.9811				N	N	N	N	N	N
H10	Sample 2		usp3	NTC	SYBR	None				Undetermined										TRUE	0.281323	TRUE	3	11	1	78.9696				Y	N	N	N	N	N
H11	Sample 2		usp3	NTC	SYBR	None				Undetermined										TRUE	0.0283192	TRUE	3	13	1	79.3162				Y	N	N	N	N	N
H12	Sample 2		usp3	NTC	SYBR	None				Undetermined										TRUE	0.0571792	TRUE	3	13	1	79.1429				Y	N	N	N	N	N
Analysis Type	Singleplex
Endogenous Control	eEF
RQ Min/Max Confidence Level	95.0
Reference Sample	Sample 1

## Sheet: Plate 2
Block Type	96fast
Chemistry	SYBR_GREEN
Experiment File Name	D:\Users\Botany\USP-PLATE-2.eds
Experiment Run End Time	2017-11-19 13:44:36 PM PST
Instrument Type	sds7500fast
Passive Reference	ROX
Well	Sample Name		Target Name	Task	Reporter	Quencher	RQ	RQ Min	RQ Max	Cт	Cт Mean	Cт SD	ΔCт	ΔCт Mean	ΔCт SE	HK Control ΔCт Mean	HK Control ΔCт SE	ΔΔCт	Automatic Ct Threshold	Ct Threshold	Automatic Baseline	Baseline Start	Baseline End	Efficiency	Tm1	Tm2	Tm3	Comments	HIGHSD	OUTLIERRG
A1			USP3	NTC	SYBR	None				Undetermined									TRUE	0.468729	TRUE	3	39	1	61.9822				N	N
A2			USP3	NTC	SYBR	None				Undetermined									TRUE	0.468729	TRUE	3	39	1	61.6366				N	N
A3			USP6	NTC	SYBR	None				Undetermined									TRUE	0.441431	TRUE	3	39	1	61.6366				N	N
A4			USP6	NTC	SYBR	None				Undetermined									TRUE	0.441431	TRUE	3	39	1	61.6366				N	N
A5			USP12	NTC	SYBR	None				Undetermined									TRUE	0.583994	TRUE	3	39	1	61.8094				N	N
A6			USP12	NTC	SYBR	None				Undetermined									TRUE	0.583994	TRUE	3	39	1	61.8094				N	N
A7	Sample 1	CONTROL	USP3	UNKNOWN	SYBR	None				21.6471	21.651	0.00704521		0.00704521					TRUE	0.468729	TRUE	3	14	1	79.2597				N	N
A8	Sample 1	CONTROL	USP3	UNKNOWN	SYBR	None				21.6592	21.651	0.00704521							TRUE	0.468729	TRUE	3	14	1	79.2597				N	N
A9	Sample 1	CONTROL	USP3	UNKNOWN	SYBR	None				21.6468	21.651	0.00704521							TRUE	0.468729	TRUE	3	14	1	79.2597				N	N
A10	Sample 2	SALT	USP3	UNKNOWN	SYBR	None				19.1904	19.5088	0.289068							TRUE	0.468729	TRUE	3	13	1	79.2597				N	N
A11	Sample 2	SALT	USP3	UNKNOWN	SYBR	None				19.5813	19.5088	0.289068							TRUE	0.468729	TRUE	3	13	1	79.2597				N	N
A12	Sample 2	SALT	USP3	UNKNOWN	SYBR	None				19.7547	19.5088	0.289068							TRUE	0.468729	TRUE	3	13	1	79.2597				N	N
B1	Sample 3	DROUGHT	USP3	UNKNOWN	SYBR	None				21.1998	20.7471	0.690151							TRUE	0.468729	TRUE	3	14	1	79.0869				Y	N
B2	Sample 3	DROUGHT	USP3	UNKNOWN	SYBR	None				19.9528	20.7471	0.690151							TRUE	0.468729	TRUE	3	14	1	79.2597				Y	N
B3	Sample 3	DROUGHT	USP3	UNKNOWN	SYBR	None				21.0888	20.7471	0.690151							TRUE	0.468729	TRUE	3	14	1	79.2597				Y	N
B4	Sample 4	COLD	USP3	UNKNOWN	SYBR	None				23.8744	23.5068	0.321239							TRUE	0.468729	TRUE	3	18	1	79.4325				N	N
B5	Sample 4	COLD	USP3	UNKNOWN	SYBR	None				23.2798	23.5068	0.321239							TRUE	0.468729	TRUE	3	17	1	79.4325				N	N
B6	Sample 4	COLD	USP3	UNKNOWN	SYBR	None				23.3662	23.5068	0.321239							TRUE	0.468729	TRUE	3	17	1	79.4325				N	N
B7	Sample 5	HEAT	USP3	UNKNOWN	SYBR	None				20.6592	21.0911	0.389617							TRUE	0.468729	TRUE	3	14	1	79.6052				N	N
B8	Sample 5	HEAT	USP3	UNKNOWN	SYBR	None				21.1978	21.0911	0.389617							TRUE	0.468729	TRUE	3	15	1	79.6052				N	N
B9	Sample 5	HEAT	USP3	UNKNOWN	SYBR	None				21.4161	21.0911	0.389617							TRUE	0.468729	TRUE	3	15	1	79.6052				N	N
B10	Sample 6	DEHYDRATION	USP3	UNKNOWN	SYBR	None				15.2268	15.5655	0.32496							TRUE	0.468729	TRUE	3	8	1	79.4325				N	N
B11	Sample 6	DEHYDRATION	USP3	UNKNOWN	SYBR	None				15.8747	15.5655	0.32496							TRUE	0.468729	TRUE	3	9	1	79.4325				N	N
B12	Sample 6	DEHYDRATION	USP3	UNKNOWN	SYBR	None				15.5948	15.5655	0.32496							TRUE	0.468729	TRUE	3	9	1	79.2597				N	N
C1	Sample 7	H2O2	USP3	UNKNOWN	SYBR	None				17.027	17.4959	0.464416							TRUE	0.468729	TRUE	3	11	1	79.0869				N	N
C2	Sample 7	H2O3	USP3	UNKNOWN	SYBR	None				17.5052	17.4959	0.464416							TRUE	0.468729	TRUE	3	11	1	79.2597				N	N
C3	Sample 7	H2O4	USP3	UNKNOWN	SYBR	None				17.9557	17.4959	0.464416							TRUE	0.468729	TRUE	3	11	1	79.4325				N	N
C4	Sample 8	ABA	USP3	UNKNOWN	SYBR	None				23.0742	23.5738	0.448878							TRUE	0.468729	TRUE	3	16	1	79.6052				N	N
C5	Sample 8	ABA	USP3	UNKNOWN	SYBR	None				23.9433	23.5738	0.448878							TRUE	0.468729	TRUE	3	18	1	79.6052				N	N
C6	Sample 8	ABA	USP3	UNKNOWN	SYBR	None				23.7039	23.5738	0.448878							TRUE	0.468729	TRUE	3	17	1	79.6052				N	N
C7	Sample 9	SA	USP3	UNKNOWN	SYBR	None				19.7661	19.7282	0.179472		0.179472					TRUE	0.468729	TRUE	3	10	1	79.6052				N	N
C8	Sample 9	SA	USP3	UNKNOWN	SYBR	None				19.8857	19.7282	0.179472							TRUE	0.468729	TRUE	3	11	1	79.4325				N	N
C9	Sample 9	SA	USP3	UNKNOWN	SYBR	None				19.5328	19.7282	0.179472							TRUE	0.468729	TRUE	3	9	1	79.4325				N	N
C10	Sample 10	GA3	USP3	UNKNOWN	SYBR	None				20.2538	20.584	0.311615		0.311615					TRUE	0.468729	TRUE	3	10	1	79.4325				N	N
C11	Sample 10	GA3	USP3	UNKNOWN	SYBR	None				20.6252	20.584	0.311615							TRUE	0.468729	TRUE	3	11	1	79.4325				N	N
C12	Sample 10	GA3	USP3	UNKNOWN	SYBR	None				20.8729	20.584	0.311615							TRUE	0.468729	TRUE	3	11	1	79.2597				N	N
D1	Sample 1	CONTROL	USP6	UNKNOWN	SYBR	None	1	0.641585	1.55864	27.3458	26.9086	0.378679		2.55408	0.230614			0	TRUE	0.441431	TRUE	3	17	1	85.8251				N	Y
D2	Sample 1	CONTROL	USP6	UNKNOWN	SYBR	None	1	0.641585	1.55864	26.692	26.9086	0.378679		2.55408	0.230614			0	TRUE	0.441431	TRUE	3	16	1	85.9979				N	N
D3	Sample 1	CONTROL	USP6	UNKNOWN	SYBR	None	1	0.641585	1.55864	26.6879	26.9086	0.378679		2.55408	0.230614			0	TRUE	0.441431	TRUE	3	16	1	85.9979				N	N
D4	Sample 2	SALT	USP6	UNKNOWN	SYBR	None	0.0665273	0.0423103	0.104605	25.8548	25.9728	0.286976		6.46398	0.23517			3.90991	TRUE	0.441431	TRUE	3	20	1	86.3435				N	N
D5	Sample 2	SALT	USP6	UNKNOWN	SYBR	None	0.0665273	0.0423103	0.104605	25.7636	25.9728	0.286976		6.46398	0.23517			3.90991	TRUE	0.441431	TRUE	3	20	1	86.3435				N	N
D6	Sample 2	SALT	USP6	UNKNOWN	SYBR	None	0.0665273	0.0423103	0.104605	26.3	25.9728	0.286976		6.46398	0.23517			3.90991	TRUE	0.441431	TRUE	3	20	1	86.5162				N	N
D7	Sample 3	DROUGHT	USP6	UNKNOWN	SYBR	None	0.0303903	0.012798	0.0721655	28.3943	28.3414	0.359913		7.59432	0.449387			5.04024	TRUE	0.441431	TRUE	3	22	1	86.5162				N	N
D8	Sample 3	DROUGHT	USP6	UNKNOWN	SYBR	None	0.0303903	0.012798	0.0721655	27.958	28.3414	0.359913		7.59432	0.449387			5.04024	TRUE	0.441431	TRUE	3	22	1	86.3435				N	N
D9	Sample 3	DROUGHT	USP6	UNKNOWN	SYBR	None	0.0303903	0.012798	0.0721655	28.672	28.3414	0.359913		7.59432	0.449387			5.04024	TRUE	0.441431	TRUE	3	22	1	86.3435				N	N
D10	Sample 4	COLD	USP6	UNKNOWN	SYBR	None	0.906422	0.618208	1.329	26.3457	26.2026	0.124206		2.69582	0.198848			0.141746	TRUE	0.441431	TRUE	3	20	1	86.3435				N	N
D11	Sample 4	COLD	USP6	UNKNOWN	SYBR	None	0.906422	0.618208	1.329	26.1228	26.2026	0.124206		2.69582	0.198848			0.141746	TRUE	0.441431	TRUE	3	20	1	86.1707				N	N
D12	Sample 4	COLD	USP6	UNKNOWN	SYBR	None	0.906422	0.618208	1.329	26.1393	26.2026	0.124206		2.69582	0.198848			0.141746	TRUE	0.441431	TRUE	3	19	1	86.1707				N	N
E1	Sample 5	HEAT	USP6	UNKNOWN	SYBR	None	0.0279395	0.0164191	0.0475431	29.0664	28.8067	0.277675		7.71563	0.276227			5.16155	TRUE	0.441431	TRUE	3	23	1	85.9979				N	N
E2	Sample 5	HEAT	USP6	UNKNOWN	SYBR	None	0.0279395	0.0164191	0.0475431	28.8396	28.8067	0.277675		7.71563	0.276227			5.16155	TRUE	0.441431	TRUE	3	21	1	85.9979				N	N
E3	Sample 5	HEAT	USP6	UNKNOWN	SYBR	None	0.0279395	0.0164191	0.0475431	28.514	28.8067	0.277675		7.71563	0.276227			5.16155	TRUE	0.441431	TRUE	3	22	1	86.1707				N	N
E4	Sample 6	DEHYDRATION	USP6	UNKNOWN	SYBR	None	0.0067148	0.0039896	0.0113015	24.9558	25.338	0.33757		9.77252	0.270526			7.21844	TRUE	0.441431	TRUE	3	18	1	86.3435				N	N
E5	Sample 6	DEHYDRATION	USP6	UNKNOWN	SYBR	None	0.0067148	0.0039896	0.0113015	25.4625	25.338	0.33757		9.77252	0.270526			7.21844	TRUE	0.441431	TRUE	3	19	1	86.5162				N	N
E6	Sample 6	DEHYDRATION	USP6	UNKNOWN	SYBR	None	0.0067148	0.0039896	0.0113015	25.5956	25.338	0.33757		9.77252	0.270526			7.21844	TRUE	0.441431	TRUE	3	19	1	86.5162				N	N
E7	Sample 7	H2O2	USP6	UNKNOWN	SYBR	None	0.00956256	0.00503711	0.0181538	27.0804	26.7584	0.342286		9.26246	0.333088			6.70839	TRUE	0.441431	TRUE	3	21	1	86.5162				N	N
E8	Sample 7	H2O3	USP6	UNKNOWN	SYBR	None	0.00956256	0.00503711	0.0181538	26.3989	26.7584	0.342286		9.26246	0.333088			6.70839	TRUE	0.441431	TRUE	3	20	1	86.3435				N	N
E9	Sample 7	H2O4	USP6	UNKNOWN	SYBR	None	0.00956256	0.00503711	0.0181538	26.796	26.7584	0.342286		9.26246	0.333088			6.70839	TRUE	0.441431	TRUE	3	21	1	86.3435				N	N
E10	Sample 8	ABA	USP6	UNKNOWN	SYBR	None	3.66721	1.99712	6.7339	26.1631	26.2532	0.312522		0.679394	0.315785			-1.87468	TRUE	0.441431	TRUE	3	18	1	86.3435				N	N
E11	Sample 8	ABA	USP6	UNKNOWN	SYBR	None	3.66721	1.99712	6.7339	26.6008	26.2532	0.312522		0.679394	0.315785			-1.87468	TRUE	0.441431	TRUE	3	18	1	86.3435				N	N
E12	Sample 8	ABA	USP6	UNKNOWN	SYBR	None	3.66721	1.99712	6.7339	25.9956	26.2532	0.312522		0.679394	0.315785			-1.87468	TRUE	0.441431	TRUE	3	17	1	86.1707				N	N
F1	Sample 9	SA	USP6	UNKNOWN	SYBR	None	0.0116301	0.00598425	0.0226026	25.3993	25.7083	0.570459		8.98007	0.34527			6.42599	TRUE	0.441431	TRUE	3	19	1	85.8251				Y	N
F2	Sample 9	SA	USP6	UNKNOWN	SYBR	None	0.0116301	0.00598425	0.0226026	26.3666	25.7083	0.570459		8.98007	0.34527			6.42599	TRUE	0.441431	TRUE	3	20	1	85.9979				Y	N
F3	Sample 9	SA	USP6	UNKNOWN	SYBR	None	0.0116301	0.00598425	0.0226026	25.3589	25.7083	0.570459		8.98007	0.34527			6.42599	TRUE	0.441431	TRUE	3	19	1	85.9979				Y	N
F4	Sample 10	GA3	USP6	UNKNOWN	SYBR	None	0.0146078	0.00975273	0.0218799	26.3218	26.2352	0.187377		8.65119	0.209932			6.09711	TRUE	0.441431	TRUE	3	20	1	86.1707				N	N
F5	Sample 10	GA3	USP6	UNKNOWN	SYBR	None	0.0146078	0.00975273	0.0218799	26.0201	26.2352	0.187377		8.65119	0.209932			6.09711	TRUE	0.441431	TRUE	3	20	1	86.3435				N	N
F6	Sample 10	GA3	USP6	UNKNOWN	SYBR	None	0.0146078	0.00975273	0.0218799	26.3635	26.2352	0.187377		8.65119	0.209932			6.09711	TRUE	0.441431	TRUE	3	20	1	86.3435				N	N
F7	Sample 1	CONTROL	USP12	UNKNOWN	SYBR	None	1	0.294824	3.39185	22.9862	23.5934	1.09188		3.23892	0.634651			0	TRUE	0.583994	TRUE	3	17	1	82.3696				Y	N
F8	Sample 1	CONTROL	USP12	UNKNOWN	SYBR	None	1	0.294824	3.39185	22.9401	23.5934	1.09188		3.23892	0.634651			0	TRUE	0.583994	TRUE	3	16	1	82.3696				Y	N
F9	Sample 1	CONTROL	USP12	UNKNOWN	SYBR	None	1	0.294824	3.39185	24.8539	23.5934	1.09188		3.23892	0.634651			0	TRUE	0.583994	TRUE	3	18	1	82.5424				Y	Y
F10	Sample 2	SALT	USP12	UNKNOWN	SYBR	None	1.81343	1.30078	2.52813	21.9702	21.889	0.0765587		2.3802	0.172647			-0.858724	TRUE	0.583994	TRUE	3	15	1	82.5424				N	N
F11	Sample 2	SALT	USP12	UNKNOWN	SYBR	None	1.81343	1.30078	2.52813	21.8787	21.889	0.0765587		2.3802	0.172647			-0.858724	TRUE	0.583994	TRUE	3	14	1	82.3696				N	N
F12	Sample 2	SALT	USP12	UNKNOWN	SYBR	None	1.81343	1.30078	2.52813	21.8181	21.889	0.0765587		2.3802	0.172647			-0.858724	TRUE	0.583994	TRUE	3	15	1	82.3696				N	N
G1	Sample 3	DROUGHT	USP12	UNKNOWN	SYBR	None	1.0065	0.466513	2.1715	23.9294	23.9767	0.0513218		3.22958	0.399559			-0.00934156	TRUE	0.583994	TRUE	3	18	1	82.0241				N	N
G2	Sample 3	DROUGHT	USP12	UNKNOWN	SYBR	None	1.0065	0.466513	2.1715	23.9694	23.9767	0.0513218		3.22958	0.399559			-0.00934156	TRUE	0.583994	TRUE	3	18	1	82.1969				N	N
G3	Sample 3	DROUGHT	USP12	UNKNOWN	SYBR	None	1.0065	0.466513	2.1715	24.0313	23.9767	0.0513218		3.22958	0.399559			-0.00934156	TRUE	0.583994	TRUE	3	17	1	82.1969				N	N
G4	Sample 4	COLD	USP12	UNKNOWN	SYBR	None	2.45901	1.61587	3.7421	25.2957	25.4476	0.199035		1.94085	0.218182			-1.29808	TRUE	0.583994	TRUE	3	18	1	82.1969				N	N
G5	Sample 4	COLD	USP12	UNKNOWN	SYBR	None	2.45901	1.61587	3.7421	25.3743	25.4476	0.199035		1.94085	0.218182			-1.29808	TRUE	0.583994	TRUE	3	18	1	82.3696				N	N
G6	Sample 4	COLD	USP12	UNKNOWN	SYBR	None	2.45901	1.61587	3.7421	25.6729	25.4476	0.199035		1.94085	0.218182			-1.29808	TRUE	0.583994	TRUE	3	18	1	82.3696				N	N
G7	Sample 5	HEAT	USP12	UNKNOWN	SYBR	None	1.0184	0.579838	1.78865	24.6612	24.3037	0.324287		3.21263	0.292668			-0.0262979	TRUE	0.583994	TRUE	3	18	1	82.5424				N	N
G8	Sample 5	HEAT	USP12	UNKNOWN	SYBR	None	1.0184	0.579838	1.78865	24.2214	24.3037	0.324287		3.21263	0.292668			-0.0262979	TRUE	0.583994	TRUE	3	17	1	82.3696				N	N
G9	Sample 5	HEAT	USP12	UNKNOWN	SYBR	None	1.0184	0.579838	1.78865	24.0285	24.3037	0.324287		3.21263	0.292668			-0.0262979	TRUE	0.583994	TRUE	3	17	1	82.3696				N	N
G10	Sample 6	DEHYDRATION	USP12	UNKNOWN	SYBR	None	0.351241	0.229796	0.536869	20.4225	20.3138	0.200535		4.74839	0.220464			1.50946	TRUE	0.583994	TRUE	3	14	1	82.3696				N	N
G11	Sample 6	DEHYDRATION	USP12	UNKNOWN	SYBR	None	0.351241	0.229796	0.536869	20.0824	20.3138	0.200535		4.74839	0.220464			1.50946	TRUE	0.583994	TRUE	3	13	1	82.1969				N	N
G12	Sample 6	DEHYDRATION	USP12	UNKNOWN	SYBR	None	0.351241	0.229796	0.536869	20.4366	20.3138	0.200535		4.74839	0.220464			1.50946	TRUE	0.583994	TRUE	3	14	1	82.1969				N	N
H1	Sample 7	H2O2	USP12	UNKNOWN	SYBR	None	1.10845	0.660074	1.8614	20.621	20.5863	0.0443961		3.09038	0.269353			-0.148545	TRUE	0.583994	TRUE	3	14	1	81.8513				N	N
H2	Sample 7	H2O3	USP12	UNKNOWN	SYBR	None	1.10845	0.660074	1.8614	20.5363	20.5863	0.0443961		3.09038	0.269353			-0.148545	TRUE	0.583994	TRUE	3	14	1	81.8513				N	N
H3	Sample 7	H2O4	USP12	UNKNOWN	SYBR	None	1.10845	0.660074	1.8614	20.6017	20.5863	0.0443961		3.09038	0.269353			-0.148545	TRUE	0.583994	TRUE	3	14	1	82.0241				N	N
H4	Sample 8	ABA	USP12	UNKNOWN	SYBR	None	0.553533	0.33459	0.915746	27.6881	27.666	0.061554		4.09218	0.261585			0.853257	TRUE	0.583994	TRUE	3	21	1	82.1969				N	N
H5	Sample 8	ABA	USP12	UNKNOWN	SYBR	None	0.553533	0.33459	0.915746	27.7134	27.666	0.061554		4.09218	0.261585			0.853257	TRUE	0.583994	TRUE	3	21	1	82.1969				N	N
H6	Sample 8	ABA	USP12	UNKNOWN	SYBR	None	0.553533	0.33459	0.915746	27.5964	27.666	0.061554		4.09218	0.261585			0.853257	TRUE	0.583994	TRUE	3	21	1	82.3696				N	N
H7	Sample 9	SA	USP12	UNKNOWN	SYBR	None	2.11419	1.72023	2.59837	21.8345	21.887	0.0472659		2.15882	0.107152			-1.08011	TRUE	0.583994	TRUE	3	12	1	82.1969				N	N
H8	Sample 9	SA	USP12	UNKNOWN	SYBR	None	2.11419	1.72023	2.59837	21.9261	21.887	0.0472659		2.15882	0.107152			-1.08011	TRUE	0.583994	TRUE	3	12	1	82.1969				N	N
H9	Sample 9	SA	USP12	UNKNOWN	SYBR	None	2.11419	1.72023	2.59837	21.9004	21.887	0.0472659		2.15882	0.107152			-1.08011	TRUE	0.583994	TRUE	3	12	1	82.0241				N	N
H10	Sample 10	GA3	USP12	UNKNOWN	SYBR	None	0.976824	0.666633	1.43135	23.005	22.8567	0.145388		3.27275	0.198529			0.0338294	TRUE	0.583994	TRUE	3	14	1	82.0241				N	N
H11	Sample 10	GA3	USP12	UNKNOWN	SYBR	None	0.976824	0.666633	1.43135	22.7144	22.8567	0.145388		3.27275	0.198529			0.0338294	TRUE	0.583994	TRUE	3	13	1	82.0241				N	N
H12	Sample 10	GA3	USP12	UNKNOWN	SYBR	None	0.976824	0.666633	1.43135	22.8507	22.8567	0.145388		3.27275	0.198529			0.0338294	TRUE	0.583994	TRUE	3	13	1	82.0241				N	N
Analysis Type	Singleplex
Endogenous Control	USP3
RQ Min/Max Confidence Level	95.0
Reference Sample	Sample 1

## Sheet: Plate 3
Block Type	96fast
Chemistry	SYBR_GREEN
Experiment File Name	D:\Users\Botany\USP-PLATE-3.eds
Experiment Run End Time	2017-11-20 14:06:49 PM PST
Instrument Type	sds7500fast
Passive Reference	ROX
Well	Sample Name		Target Name	Task	Reporter	Quencher	RQ	RQ Min	RQ Max	Cт	Cт Mean	Cт SD	ΔCт	ΔCт Mean	ΔCт SE	HK Control ΔCт Mean	HK Control ΔCт SE	ΔΔCт	Automatic Ct Threshold	Ct Threshold	Automatic Baseline	Baseline Start	Baseline End	Efficiency	Tm1	Tm2	Tm3	Comments	HIGHSD	NOAMP	OUTLIERRG	EXPFAIL	MTP
A1	Sample 1	CONTROL	USP14	UNKNOWN	SYBR	None	1	0.783615	1.27614	26.7437	26.7829	0.0396044		-9.69685	0.126703			0	TRUE	0.193319	TRUE	3	17	1	78.9314				N	N	N	N	N
A2	Sample 1	CONTROL	USP14	UNKNOWN	SYBR	None	1	0.783615	1.27614	26.8229	26.7829	0.0396044		-9.69685	0.126703			0	TRUE	0.193319	TRUE	3	17	1	79.1031				N	N	N	N	N
A3	Sample 1	CONTROL	USP14	UNKNOWN	SYBR	None	1	0.783615	1.27614	26.782	26.7829	0.0396044		-9.69685	0.126703			0	TRUE	0.193319	TRUE	3	17	1	79.1031				N	N	N	N	N
A4	Sample 2	SALT	USP14	UNKNOWN	SYBR	None	0.362111	0.188982	0.693846	25.3196	25.4918	0.167767		-8.23135	0.337908			1.46549	TRUE	0.193319	TRUE	3	20	1	80.477				N	N	N	N	N
A5	Sample 2	SALT	USP14	UNKNOWN	SYBR	None	0.362111	0.188982	0.693846	25.5011	25.4918	0.167767		-8.23135	0.337908			1.46549	TRUE	0.193319	TRUE	3	21	1	80.3052				N	N	N	N	N
A6	Sample 2	SALT	USP14	UNKNOWN	SYBR	None	0.362111	0.188982	0.693846	25.6548	25.4918	0.167767		-8.23135	0.337908			1.46549	TRUE	0.193319	TRUE	3	20	1	80.477				N	N	N	N	N
A7	Sample 3	DROUGHT	USP14	UNKNOWN	SYBR	None	1.29847	0.661386	2.54925	26.0415	26.3529	0.320139		-10.0737	0.350539			-0.376818	TRUE	0.193319	TRUE	3	21	1	80.6487				N	N	N	N	N
A8	Sample 3	DROUGHT	USP14	UNKNOWN	SYBR	None	1.29847	0.661386	2.54925	26.3361	26.3529	0.320139		-10.0737	0.350539			-0.376818	TRUE	0.193319	TRUE	3	22	1	80.6487				N	N	N	N	N
A9	Sample 3	DROUGHT	USP14	UNKNOWN	SYBR	None	1.29847	0.661386	2.54925	26.6811	26.3529	0.320139		-10.0737	0.350539			-0.376818	TRUE	0.193319	TRUE	3	22	1	80.477				N	N	N	N	N
A10	Sample 4	COLD	USP14	UNKNOWN	SYBR	None	1.14295	0.311291	4.19648	25.7987	26.6217	1.14634		-9.88961	0.675836			-0.192759	TRUE	0.193319	TRUE	3	21	1	79.4466				Y	N	N	N	N
A11	Sample 4	COLD	USP14	UNKNOWN	SYBR	None	1.14295	0.311291	4.19648	26.1353	26.6217	1.14634		-9.88961	0.675836			-0.192759	TRUE	0.193319	TRUE	3	21	1	79.2749				Y	N	N	N	N
A12	Sample 4	COLD	USP14	UNKNOWN	SYBR	None	1.14295	0.311291	4.19648	26.931	26.6217	1.14634		-9.88961	0.675836			-0.192759	TRUE	0.193319	TRUE	3	23	1	79.1031				Y	N	N	N	N
B1	Sample 5	HEAT	USP14	UNKNOWN	SYBR	None	0.677382	0.259698	1.76685	27.7885	26.8362	0.824806		-9.13489	0.498168			0.561959	TRUE	0.193319	TRUE	3	23	1	80.3052				Y	N	Y	N	N
B2	Sample 5	HEAT	USP14	UNKNOWN	SYBR	None	0.677382	0.259698	1.76685	26.3456	26.8362	0.824806		-9.13489	0.498168			0.561959	TRUE	0.193319	TRUE	3	21	1	80.477				Y	N	N	N	N
B3	Sample 5	HEAT	USP14	UNKNOWN	SYBR	None	0.677382	0.259698	1.76685	26.3747	26.8362	0.824806		-9.13489	0.498168			0.561959	TRUE	0.193319	TRUE	3	21	1	80.6487				Y	N	N	N	N
B4	Sample 6	DEHYDRATION	USP14	UNKNOWN	SYBR	None	0.271531	0.225729	0.326626	25.5228	25.566	0.0994928		-7.81604	0.0959945			1.88081	TRUE	0.193319	TRUE	3	21	1	80.477				N	N	N	N	N
B5	Sample 6	DEHYDRATION	USP14	UNKNOWN	SYBR	None	0.271531	0.225729	0.326626	25.6798	25.566	0.0994928		-7.81604	0.0959945			1.88081	TRUE	0.193319	TRUE	3	21	1	80.3052				N	N	N	N	N
B6	Sample 6	DEHYDRATION	USP14	UNKNOWN	SYBR	None	0.271531	0.225729	0.326626	25.4953	25.566	0.0994928		-7.81604	0.0959945			1.88081	TRUE	0.193319	TRUE	3	21	1	80.477				N	N	N	N	N
B7	Sample 7	H2O2	USP14	UNKNOWN	SYBR	None	0.44465	0.201971	0.978919	26.5238	26.6102	0.107052		-8.52759	0.410064			1.16926	TRUE	0.193319	TRUE	3	22	1	79.6183				N	N	N	N	N
B8	Sample 7	H2O3	USP14	UNKNOWN	SYBR	None	0.44465	0.201971	0.978919	26.5768	26.6102	0.107052		-8.52759	0.410064			1.16926	TRUE	0.193319	TRUE	3	22	1	79.6183				N	N	N	N	N
B9	Sample 7	H2O4	USP14	UNKNOWN	SYBR	None	0.44465	0.201971	0.978919	26.7299	26.6102	0.107052		-8.52759	0.410064			1.16926	TRUE	0.193319	TRUE	3	22	1	79.6183				N	N	N	N	N
B10	Sample 8	ABA	USP14	UNKNOWN	SYBR	None	0.857307	0.551838	1.33187	25.5062	25.4882	0.14857		-9.47473	0.228914			0.222116	TRUE	0.193319	TRUE	3	17	1	79.7901				N	N	N	N	N
B11	Sample 8	ABA	USP14	UNKNOWN	SYBR	None	0.857307	0.551838	1.33187	25.3314	25.4882	0.14857		-9.47473	0.228914			0.222116	TRUE	0.193319	TRUE	3	16	1	79.6183				N	N	N	N	N
B12	Sample 8	ABA	USP14	UNKNOWN	SYBR	None	0.857307	0.551838	1.33187	25.6269	25.4882	0.14857		-9.47473	0.228914			0.222116	TRUE	0.193319	TRUE	3	16	1	79.4466				N	N	N	N	N
C1	Sample 9	SA	USP14	UNKNOWN	SYBR	None	0.068427	0.0585934	0.079911	24.9435	24.8792	0.0866145		-5.82756	0.080617			3.86929	TRUE	0.193319	TRUE	3	20	1	80.1335				N	N	N	N	N
C2	Sample 9	SA	USP14	UNKNOWN	SYBR	None	0.068427	0.0585934	0.079911	24.9134	24.8792	0.0866145		-5.82756	0.080617			3.86929	TRUE	0.193319	TRUE	3	20	1	80.477				N	N	N	N	N
C3	Sample 9	SA	USP14	UNKNOWN	SYBR	None	0.068427	0.0585934	0.079911	24.7807	24.8792	0.0866145		-5.82756	0.080617			3.86929	TRUE	0.193319	TRUE	3	20	1	80.477				N	N	N	N	N
C4	Sample 10	GA3	USP14	UNKNOWN	SYBR	None	0.529553	0.328435	0.853827	24.8016	24.912	0.12042		-8.7797	0.24822			0.917152	TRUE	0.193319	TRUE	3	20	1	80.6487				N	N	N	N	N
C5	Sample 10	GA3	USP14	UNKNOWN	SYBR	None	0.529553	0.328435	0.853827	24.8939	24.912	0.12042		-8.7797	0.24822			0.917152	TRUE	0.193319	TRUE	3	20	1	80.6487				N	N	N	N	N
C6	Sample 10	GA3	USP14	UNKNOWN	SYBR	None	0.529553	0.328435	0.853827	25.0404	24.912	0.12042		-8.7797	0.24822			0.917152	TRUE	0.193319	TRUE	3	20	1	80.8204				N	N	N	N	N
C7	Sample 1	CONTROL	USP22	UNKNOWN	SYBR	None				32.4943	32.4846	0.124908							TRUE	0.217138	TRUE	3	39	1	62.789				N	Y	N	Y	N
C8	Sample 1	CONTROL	USP22	UNKNOWN	SYBR	None				32.6043	32.4846	0.124908							TRUE	0.217138	TRUE	3	26	1	88.3764	81.3356			N	N	N	N	Y
C9	Sample 1	CONTROL	USP22	UNKNOWN	SYBR	None				32.3551	32.4846	0.124908							TRUE	0.217138	TRUE	3	26	1	88.3764	76.012	81.1639		N	N	N	N	Y
C10	Sample 2	SALT	USP22	UNKNOWN	SYBR	None				33.953	33.7232	0.560714							TRUE	0.217138	TRUE	3	28	1	89.4068	66.0518			Y	N	N	N	Y
C11	Sample 2	SALT	USP22	UNKNOWN	SYBR	None				34.1325	33.7232	0.560714							TRUE	0.217138	TRUE	3	28	1	89.2351				Y	N	N	N	N
C12	Sample 2	SALT	USP22	UNKNOWN	SYBR	None				33.0841	33.7232	0.560714							TRUE	0.217138	TRUE	3	28	1	89.2351				Y	N	N	N	N
D1	Sample 3	DROUGHT	USP22	UNKNOWN	SYBR	None				35.1954	35.4266	0.515892							TRUE	0.217138	TRUE	3	31	1	88.5482	64.5063	80.8204		Y	N	N	N	Y
D2	Sample 3	DROUGHT	USP22	UNKNOWN	SYBR	None				36.0176	35.4266	0.515892							TRUE	0.217138	TRUE	3	31	1	88.3764	65.0215	81.1639		Y	N	N	N	Y
D3	Sample 3	DROUGHT	USP22	UNKNOWN	SYBR	None				35.0666	35.4266	0.515892							TRUE	0.217138	TRUE	3	30	1	88.7199	64.678	81.3356		Y	N	N	N	Y
D4	Sample 4	COLD	USP22	UNKNOWN	SYBR	None				35.241	25.5113	17.1722							TRUE	0.217138	TRUE	3	31	1	82.5377				N	N	N	N	N
D5	Sample 4	COLD	USP22	UNKNOWN	SYBR	None				35.6092	25.5113	17.1722							TRUE	0.217138	TRUE	3	31	1	76.3555	87.8613	65.1932		N	N	N	N	Y
D6	Sample 4	COLD	USP22	UNKNOWN	SYBR	None				5.68359	25.5113	17.1722							TRUE	0.217138	TRUE	3	31	1	88.033	81.5073	65.5367		N	N	N	N	Y
D7	Sample 5	HEAT	USP22	UNKNOWN	SYBR	None				35.6787	35.9711	0.253393							TRUE	0.217138	TRUE	3	30	1	89.2351				N	N	N	N	N
D8	Sample 5	HEAT	USP22	UNKNOWN	SYBR	None				36.1078	35.9711	0.253393							TRUE	0.217138	TRUE	3	30	1	89.4068	64.8497			N	N	N	N	Y
D9	Sample 5	HEAT	USP22	UNKNOWN	SYBR	None				36.1269	35.9711	0.253393							TRUE	0.217138	TRUE	3	30	1	89.2351	65.1932	81.8508		N	N	N	N	Y
D10	Sample 6	DEHYDRATION	USP22	UNKNOWN	SYBR	None				33.5019	33.382	0.133214							TRUE	0.217138	TRUE	3	28	1	89.2351				N	N	N	N	N
D11	Sample 6	DEHYDRATION	USP22	UNKNOWN	SYBR	None				33.4056	33.382	0.133214							TRUE	0.217138	TRUE	3	28	1	89.2351	75.6686			N	N	N	N	Y
D12	Sample 6	DEHYDRATION	USP22	UNKNOWN	SYBR	None				33.2386	33.382	0.133214							TRUE	0.217138	TRUE	3	28	1	89.0634				N	N	N	N	N
E1	Sample 7	H2O2	USP22	UNKNOWN	SYBR	None				32.4736	33.1378	0.702138							TRUE	0.217138	TRUE	3	29	1	88.8916	65.3649			Y	N	N	N	Y
E2	Sample 7	H2O3	USP22	UNKNOWN	SYBR	None				33.0671	33.1378	0.702138							TRUE	0.217138	TRUE	3	30	1	88.8916	75.1534	65.0215		Y	N	N	N	Y
E3	Sample 7	H2O4	USP22	UNKNOWN	SYBR	None				33.8725	33.1378	0.702138							TRUE	0.217138	TRUE	3	30	1	89.0634	64.8497			Y	N	N	N	Y
E4	Sample 8	ABA	USP22	UNKNOWN	SYBR	None				33.3164	32.9629	0.367604							TRUE	0.217138	TRUE	3	25	1	87.8613	81.5073			N	N	N	N	Y
E5	Sample 8	ABA	USP22	UNKNOWN	SYBR	None				32.9896	32.9629	0.367604							TRUE	0.217138	TRUE	3	26	1	87.8613	81.3356	75.6686		N	N	N	N	Y
E6	Sample 8	ABA	USP22	UNKNOWN	SYBR	None				32.5827	32.9629	0.367604							TRUE	0.217138	TRUE	3	25	1	87.8613	81.3356			N	N	N	N	Y
E7	Sample 9	SA	USP22	UNKNOWN	SYBR	None				30.7221	30.7068	0.109523							TRUE	0.217138	TRUE	3	25	1	89.2351				N	N	N	N	N
E8	Sample 9	SA	USP22	UNKNOWN	SYBR	None				30.5904	30.7068	0.109523							TRUE	0.217138	TRUE	3	25	1	89.2351				N	N	N	N	N
E9	Sample 9	SA	USP22	UNKNOWN	SYBR	None				30.8078	30.7068	0.109523							TRUE	0.217138	TRUE	3	26	1	89.2351				N	N	N	N	N
E10	Sample 10	GA3	USP22	UNKNOWN	SYBR	None				34.0754	33.6917	0.41272							TRUE	0.217138	TRUE	3	28	1	89.0634	65.3649			N	N	N	N	Y
E11	Sample 10	GA3	USP22	UNKNOWN	SYBR	None				33.7445	33.6917	0.41272							TRUE	0.217138	TRUE	3	28	1	89.0634				N	N	N	N	N
E12	Sample 10	GA3	USP22	UNKNOWN	SYBR	None				33.2551	33.6917	0.41272							TRUE	0.217138	TRUE	3	28	1	89.0634	65.5367			N	N	N	N	Y
F1	Sample 1	CONTROL	USP33	UNKNOWN	SYBR	None	1	0.78962	1.26643	29.0082	28.98	0.027862		1.5266	0.122736			0	TRUE	0.407866	TRUE	3	23	1	81.0026				N	N	N	N	N	N
F2	Sample 1	CONTROL	USP33	UNKNOWN	SYBR	None	1	0.78962	1.26643	28.9793	28.98	0.027862		1.5266	0.122736			0	TRUE	0.407866	TRUE	3	22	1	81.1759				N	N	N	N	N	N
F3	Sample 1	CONTROL	USP33	UNKNOWN	SYBR	None	1	0.78962	1.26643	28.9525	28.98	0.027862		1.5266	0.122736			0	TRUE	0.407866	TRUE	3	22	1	81.0026
F4	Sample 2	SALT	USP33	UNKNOWN	SYBR	None	0.908225	0.728184	1.13278	30.4251	30.3641	0.100526		1.66548	0.114804			0.138878	TRUE	0.407866	TRUE	3	23	1	81.1759				N	N	N	N	N	N
F5	Sample 2	SALT	USP33	UNKNOWN	SYBR	None	0.908225	0.728184	1.13278	30.4191	30.3641	0.100526		1.66548	0.114804			0.138878	TRUE	0.407866	TRUE	3	22	1	81.0026				N	N	N	N	N	N
F6	Sample 2	SALT	USP33	UNKNOWN	SYBR	None	0.908225	0.728184	1.13278	30.2481	30.3641	0.100526		1.66548	0.114804			0.138878	TRUE	0.407866	TRUE	3	23	1	81.0026				N	N	N	N	N	N
F7	Sample 3	DROUGHT	USP33	UNKNOWN	SYBR	None	1.56654	1.3542	1.81216	27.8783	27.8645	0.0304303		0.879025	0.0756846			-0.647578	TRUE	0.407866	TRUE	3	22	1	81.1759
F8	Sample 3	DROUGHT	USP33	UNKNOWN	SYBR	None	1.56654	1.3542	1.81216	27.8856	27.8645	0.0304303		0.879025	0.0756846			-0.647578	TRUE	0.407866	TRUE	3	22	1	81.3492				N	N	N	N	N	N
F9	Sample 3	DROUGHT	USP33	UNKNOWN	SYBR	None	1.56654	1.3542	1.81216	27.8296	27.8645	0.0304303		0.879025	0.0756846			-0.647578	TRUE	0.407866	TRUE	3	22	1	81.3492				N	N	N	N	N	N
F10	Sample 4	COLD	USP33	UNKNOWN	SYBR	None	0.245339	0.149902	0.401536	30.1909	30.5404	0.35254		3.55375	0.255994			2.02715	TRUE	0.407866	TRUE	3	24	1	81.5225				N	N	N	N	N	N
F11	Sample 4	COLD	USP33	UNKNOWN	SYBR	None	0.245339	0.149902	0.401536	30.8959	30.5404	0.35254		3.55375	0.255994			2.02715	TRUE	0.407866	TRUE	3	25	1	81.3492				N	N	N	N	N	N
F12	Sample 4	COLD	USP33	UNKNOWN	SYBR	None	0.245339	0.149902	0.401536	30.5345	30.5404	0.35254		3.55375	0.255994			2.02715	TRUE	0.407866	TRUE	3	25	1	81.3492				N	N	N	N	N	N
G1	Sample 5	HEAT	USP33	UNKNOWN	SYBR	None	0.39493	0.283832	0.549516	26.5613	26.5462	0.0415549		2.86693	0.171645			1.34033	TRUE	0.407866	TRUE	3	26	1	81.5225				N	N	N	N	N	N
G2	Sample 5	HEAT	USP33	UNKNOWN	SYBR	None	0.39493	0.283832	0.549516	26.578	26.5462	0.0415549		2.86693	0.171645			1.34033	TRUE	0.407866	TRUE	3	27	1	81.3492				N	N	N	N	N	N
G3	Sample 5	HEAT	USP33	UNKNOWN	SYBR	None	0.39493	0.283832	0.549516	26.4992	26.5462	0.0415549		2.86693	0.171645			1.34033	TRUE	0.407866	TRUE	3	27	1	81.1759
G4	Sample 6	DEHYDRATION	USP33	UNKNOWN	SYBR	None	6.64987	5.43344	8.13863	23.8757	23.9205	0.0401644		-1.20672	0.104976			-2.73333	TRUE	0.407866	TRUE	3	18	1	81.3492				N	N	N	N	N	N
G5	Sample 6	DEHYDRATION	USP33	UNKNOWN	SYBR	None	6.64987	5.43344	8.13863	23.9534	23.9205	0.0401644		-1.20672	0.104976			-2.73333	TRUE	0.407866	TRUE	3	18	1	81.3492				N	N	N	N	N	N
G6	Sample 6	DEHYDRATION	USP33	UNKNOWN	SYBR	None	6.64987	5.43344	8.13863	23.9323	23.9205	0.0401644		-1.20672	0.104976			-2.73333	TRUE	0.407866	TRUE	3	18	1	81.3492				N	N	N	N	N	N
G7	Sample 7	H2O2	USP33	UNKNOWN	SYBR	None	1.30473	1.11308	1.52939	32.5852	32.5096	0.0669962		1.14285	0.0825516			-0.383753	TRUE	0.407866	TRUE	3	21	1	81.3492				N	N	N	N	N	N
G8	Sample 7	H2O3	USP33	UNKNOWN	SYBR	None	1.30473	1.11308	1.52939	32.4858	32.5096	0.0669962		1.14285	0.0825516			-0.383753	TRUE	0.407866	TRUE	3	21	1	81.0026
G9	Sample 7	H2O4	USP33	UNKNOWN	SYBR	None	1.30473	1.11308	1.52939	32.4577	32.5096	0.0669962		1.14285	0.0825516			-0.383753	TRUE	0.407866	TRUE	3	21	1	81.1759				N	N	N	N	N	N
G10	Sample 8	ABA	USP33	UNKNOWN	SYBR	None	0.21277	0.0848601	0.533481	33.8787	33.7264	0.813004		3.75923	0.477639			2.23263	TRUE	0.407866	TRUE	3	28	1	81.3492				N	N	Y	N	N	N
G11	Sample 8	ABA	USP33	UNKNOWN	SYBR	None	0.21277	0.0848601	0.533481	32.848	33.7264	0.813004		3.75923	0.477639			2.23263	TRUE	0.407866	TRUE	3	27	1	81.3492				N	N	Y	N	N	N
G12	Sample 8	ABA	USP33	UNKNOWN	SYBR	None	0.21277	0.0848601	0.533481	34.4524	33.7264	0.813004		3.75923	0.477639			2.23263	TRUE	0.407866	TRUE	3	28	1	81.3492				N	N	Y	N	N	N
H1	Sample 9	SA	USP33	UNKNOWN	SYBR	None				27.6722	27.7701	0.0978032							TRUE	0.217138	TRUE	3	25	1	89.2351				N	N	N	N	N
H2	Sample 9	SA	USP33	UNKNOWN	SYBR	None				27.7704	27.7701	0.0978032							TRUE	0.217138	TRUE	3	25	1	89.2351				N	N	N	N	N
H3	Sample 9	SA	USP33	UNKNOWN	SYBR	None				27.8678	27.7701	0.0978032							TRUE	0.217138	TRUE	3	26	1	89.2351				N	N	N	N	N
H4	Sample 10	GA3	USP33	UNKNOWN	SYBR	None				27.7075	27.8624	0.136335							TRUE	0.217138	TRUE	3	28	1	89.0634	65.3649			N	N	N	N	Y
H5	Sample 10	GA3	USP33	UNKNOWN	SYBR	None				27.9645	27.8624	0.136335							TRUE	0.217138	TRUE	3	28	1	89.0634				N	N	N	N	N
H6	Sample 10	GA3	USP33	UNKNOWN	SYBR	None				27.9151	27.8624	0.136335							TRUE	0.217138	TRUE	3	28	1	89.0634	65.5367			N	N	N	N	Y
H7
H8
H9
H10
H11
H12
Analysis Type	Singleplex
Endogenous Control	USP23
RQ Min/Max Confidence Level	95.0
Reference Sample	Sample 1

## Sheet: Plate 4
Block Type	96fast
Chemistry	SYBR_GREEN
Experiment File Name	D:\Users\Botany\USP-PLATE-5.eds
Experiment Run End Time	2017-11-22 13:44:02 PM PST
Instrument Type	sds7500fast
Passive Reference	ROX
Well	Sample Name		Target Name	Task	Reporter	Quencher	RQ	RQ Min	RQ Max	Cт	Cт Mean	Cт SD	ΔCт	ΔCт Mean	ΔCт SE	HK Control ΔCт Mean	HK Control ΔCт SE	ΔΔCт	Automatic Ct Threshold	Ct Threshold	Automatic Baseline	Baseline Start	Baseline End	Efficiency	Tm1	Tm2	Tm3	Comments	AMPNC	HIGHSD	MTP
A1	Sample 1	CONTROL	USP32	UNKNOWN	SYBR	None	1	0.0619671	16.1376	27.9622	27.9647	0.0187714		1.03482	1.44514			0	TRUE	0.454286	TRUE	3	18	1	81.3356				N	Y	N
A2	Sample 1	CONTROL	USP32	UNKNOWN	SYBR	None	1	0.0619671	16.1376	27.9846	27.9647	0.0187714		1.03482	1.44514			0	TRUE	0.454286	TRUE	3	22	1	81.6791				N	Y	N
A3	Sample 1	CONTROL	USP32	UNKNOWN	SYBR	None	1	0.0619671	16.1376	27.9473	27.9647	0.0187714		1.03482	1.44514			0	TRUE	0.454286	TRUE	3	22	1	81.8508				N	Y	N
A4	Sample 2	SALT	USP32	UNKNOWN	SYBR	None	5.6845	0.0770587	419.337	26.2723	26.4508	0.177261		-1.47221	2.23485			-2.50703	TRUE	0.454286	TRUE	3	22	1	81.8508				N	Y	N
A5	Sample 2	SALT	USP32	UNKNOWN	SYBR	None	5.6845	0.0770587	419.337	26.4534	26.4508	0.177261		-1.47221	2.23485			-2.50703	TRUE	0.454286	TRUE	3	24	1	81.8508				N	Y	N
A6	Sample 2	SALT	USP32	UNKNOWN	SYBR	None	5.6845	0.0770587	419.337	26.6268	26.4508	0.177261		-1.47221	2.23485			-2.50703	TRUE	0.454286	TRUE	3	20	1	81.8508				N	Y	N
A7	Sample 3	DROUGHT	USP32	UNKNOWN	SYBR	None	676.695	397.889	1150.86	28.1711	28.3026	0.113951		-8.36754	0.275943			-9.40236	TRUE	0.454286	TRUE	3	21	1	82.0225				N	N	N
A8	Sample 3	DROUGHT	USP32	UNKNOWN	SYBR	None	676.695	397.889	1150.86	28.3711	28.3026	0.113951		-8.36754	0.275943			-9.40236	TRUE	0.454286	TRUE	3	20	1	81.8508				N	N	N
A9	Sample 3	DROUGHT	USP32	UNKNOWN	SYBR	None	676.695	397.889	1150.86	28.3657	28.3026	0.113951		-8.36754	0.275943			-9.40236	TRUE	0.454286	TRUE	3	22	1	83.3963				N	N	N
A10	Sample 4	COLD	USP32	UNKNOWN	SYBR	None	9.63424	0.196723	471.824	27.7297	27.7863	0.150479		-2.23335	2.02199			-3.26817	TRUE	0.454286	TRUE	3	22	1	83.5681				N	Y	N
A11	Sample 4	COLD	USP32	UNKNOWN	SYBR	None	9.63424	0.196723	471.824	27.6723	27.7863	0.150479		-2.23335	2.02199			-3.26817	TRUE	0.454286	TRUE	3	22	1	91.4675	67.9408			N	Y	Y
A12	Sample 4	COLD	USP32	UNKNOWN	SYBR	None	9.63424	0.196723	471.824	27.9568	27.7863	0.150479		-2.23335	2.02199			-3.26817	TRUE	0.454286	TRUE	3	28	1	91.1241	68.1126	86.8309		N	Y	Y
B1	Sample 5	HEAT	USP32	UNKNOWN	SYBR	None	2486.78	188.436	32818	29.9703	29.2944	1.14791		-10.2452	1.34061			-11.2801	TRUE	0.454286	TRUE	3	18	1	81.3356				N	Y	N
B2	Sample 5	HEAT	USP32	UNKNOWN	SYBR	None	2486.78	188.436	32818	30.01	29.2944	1.14791		-10.2452	1.34061			-11.2801	TRUE	0.454286	TRUE	3	22	1	81.6791				N	Y	N
B3	Sample 5	HEAT	USP32	UNKNOWN	SYBR	None	2486.78	188.436	32818	29.9028	29.2944	1.14791		-10.2452	1.34061			-11.2801	TRUE	0.454286	TRUE	3	22	1	81.8508				N	Y	N
B4	Sample 6	DEHYDRATION	USP32	UNKNOWN	SYBR	None	77.2097	11.1679	533.793	26.4034	26.4722	0.183909		-5.23589	1.00468			-6.27071	TRUE	0.454286	TRUE	3	22	1	81.6791				N	Y	N
B5	Sample 6	DEHYDRATION	USP32	UNKNOWN	SYBR	None	77.2097	11.1679	533.793	26.6806	26.4722	0.183909		-5.23589	1.00468			-6.27071	TRUE	0.454286	TRUE	3	24	1	81.8508				N	Y	N
B6	Sample 6	DEHYDRATION	USP32	UNKNOWN	SYBR	None	77.2097	11.1679	533.793	26.3326	26.4722	0.183909		-5.23589	1.00468			-6.27071	TRUE	0.454286	TRUE	3	20	1	81.8508				N	Y	N
B7	Sample 7	H2O2	USP32	UNKNOWN	SYBR	None	415.132	174.318	988.62	26.9842	26.6844	0.597388		-7.6626	0.450881			-8.69743	TRUE	0.454286	TRUE	3	21	1	81.8508				N	Y	N
B8	Sample 7	H2O3	USP32	UNKNOWN	SYBR	None	415.132	174.318	988.62	27.0726	26.6844	0.597388		-7.6626	0.450881			-8.69743	TRUE	0.454286	TRUE	3	20	1	82.0225				N	Y	N
B9	Sample 7	H2O4	USP32	UNKNOWN	SYBR	None	415.132	174.318	988.62	25.9965	26.6844	0.597388		-7.6626	0.450881			-8.69743	TRUE	0.454286	TRUE	3	22	1	83.3963				N	Y	N
B10	Sample 8	ABA	USP32	UNKNOWN	SYBR	None	2.01824	0.0435896	93.4463	28.569	27.6811	1.13736		0.0217279	1.99283			-1.0131	TRUE	0.454286	TRUE	3	22	1	83.5681				N	Y	N
B11	Sample 8	ABA	USP32	UNKNOWN	SYBR	None	2.01824	0.0435896	93.4463	28.0752	27.6811	1.13736		0.0217279	1.99283			-1.0131	TRUE	0.454286	TRUE	3	23	1	91.2958	68.2843			N	Y	Y
B12	Sample 8	ABA	USP32	UNKNOWN	SYBR	None	2.01824	0.0435896	93.4463	26.3991	27.6811	1.13736		0.0217279	1.99283			-1.0131	TRUE	0.454286	TRUE	3	27	1	91.2958	68.456	86.8309		N	Y	Y
C1	Sample 9	SA	USP32	UNKNOWN	SYBR	None	112.142	8.68281	1448.36	27.4317	27.1048	0.727078		-5.77436	1.32941			-6.80918	TRUE	0.454286	TRUE	3	18	1	81.1639				N	Y	N
C2	Sample 9	SA	USP32	UNKNOWN	SYBR	None	112.142	8.68281	1448.36	27.6111	27.1048	0.727078		-5.77436	1.32941			-6.80918	TRUE	0.454286	TRUE	3	21	1	81.6791				N	Y	N
C3	Sample 9	SA	USP32	UNKNOWN	SYBR	None	112.142	8.68281	1448.36	26.2717	27.1048	0.727078		-5.77436	1.32941			-6.80918	TRUE	0.454286	TRUE	3	22	1	81.8508				N	Y	N
C4	Sample 10	GA3	USP32	UNKNOWN	SYBR	None	265.976	36.0773	1960.88	28.2931	27.8711	0.676658		-7.02033	1.03807			-8.05515	TRUE	0.454286	TRUE	3	22	1	81.6791				N	Y	N
C5	Sample 10	GA3	USP32	UNKNOWN	SYBR	None	265.976	36.0773	1960.88	28.2296	27.8711	0.676658		-7.02033	1.03807			-8.05515	TRUE	0.454286	TRUE	3	23	1	81.8508				N	Y	N
C6	Sample 10	GA3	USP32	UNKNOWN	SYBR	None	265.976	36.0773	1960.88	27.0906	27.8711	0.676658		-7.02033	1.03807			-8.05515	TRUE	0.454286	TRUE	3	20	1	81.8508				N	Y	N
C7	Sample 1	CONTROL	USP36	UNKNOWN	SYBR	None				33.3522	32.9632	0.424487							TRUE	0.227818	TRUE	3	21	1	81.8508				N	Y	N
C8	Sample 1	CONTROL	USP36	UNKNOWN	SYBR	None				33.027	32.9632	0.424487							TRUE	0.227818	TRUE	3	19	1	81.8508				N	Y	N
C9	Sample 1	CONTROL	USP36	UNKNOWN	SYBR	None				32.5104	32.9632	0.424487							TRUE	0.227818	TRUE	3	22	1	83.2246				N	Y	N
C10	Sample 2	SALT	USP36	UNKNOWN	SYBR	None				34.8157	34.3232	0.783643							TRUE	0.227818	TRUE	3	22	1	83.3963				N	Y	N
C11	Sample 2	SALT	USP36	UNKNOWN	SYBR	None				34.7343	34.3232	0.783643							TRUE	0.227818	TRUE	3	22	1	91.2958	68.1126			N	Y	Y
C12	Sample 2	SALT	USP36	UNKNOWN	SYBR	None				33.4195	34.3232	0.783643							TRUE	0.227818	TRUE	3	27	1	91.1241	68.2843	86.4874		N	Y	Y
D1	Sample 3	DROUGHT	USP36	UNKNOWN	SYBR	None				35.1329	35.3568	0.203669							TRUE	0.227818	TRUE	3	29	1	90.9524	66.0518	86.6592		N	N	Y
D2	Sample 3	DROUGHT	USP36	UNKNOWN	SYBR	None				35.531	35.3568	0.203669							TRUE	0.227818	TRUE	3	29	1	91.1241	86.6592	64.8497		N	N	Y
D3	Sample 3	DROUGHT	USP36	UNKNOWN	SYBR	None				35.4066	35.3568	0.203669							TRUE	0.227818	TRUE	3	30	1	87.1743	91.2958	65.0215		N	N	Y
D4	Sample 4	COLD	USP36	UNKNOWN	SYBR	None				33.1703	33.0496	0.19482							TRUE	0.227818	TRUE	3	27	1	76.8707	91.4675	87.1743		N	N	Y
D5	Sample 4	COLD	USP36	UNKNOWN	SYBR	None				33.1536	33.0496	0.19482							TRUE	0.227818	TRUE	3	28	1	77.0424	91.4675			N	N	Y
D6	Sample 4	COLD	USP36	UNKNOWN	SYBR	None				32.8248	33.0496	0.19482							TRUE	0.227818	TRUE	3	28	1	91.4675	77.3859	67.2539		N	N	Y
D7	Sample 5	HEAT	USP36	UNKNOWN	SYBR	None				37.0082	36.8463	0.166387							TRUE	0.227818	TRUE	3	31	1	91.4675	63.9911	87.1743		N	N	Y
D8	Sample 5	HEAT	USP36	UNKNOWN	SYBR	None				36.6758	36.8463	0.166387							TRUE	0.227818	TRUE	3	31	1	85.4571	91.4675	64.5063		N	N	Y
D9	Sample 5	HEAT	USP36	UNKNOWN	SYBR	None				36.8548	36.8463	0.166387							TRUE	0.227818	TRUE	3	31	1	91.2958	85.6288			N	N	Y
D10	Sample 6	DEHYDRATION	USP36	UNKNOWN	SYBR	None				33.7205	33.3548	0.356418							TRUE	0.227818	TRUE	3	29	1	91.2958				N	N	N
D11	Sample 6	DEHYDRATION	USP36	UNKNOWN	SYBR	None				33.0084	33.3548	0.356418							TRUE	0.227818	TRUE	3	28	1	91.1241	87.0026	68.6277		N	N	Y
D12	Sample 6	DEHYDRATION	USP36	UNKNOWN	SYBR	None				33.3354	33.3548	0.356418							TRUE	0.227818	TRUE	3	27	1	91.1241	68.1126	86.4874		N	N	Y
E1	Sample 7	H2O2	USP36	UNKNOWN	SYBR	None				32.5226	32.5803	0.0573198							TRUE	0.227818	TRUE	3	29	1	90.9524	65.1932			N	N	Y
E2	Sample 7	H2O3	USP36	UNKNOWN	SYBR	None				32.6373	32.5803	0.0573198							TRUE	0.227818	TRUE	3	29	1	90.9524	65.1932			N	N	Y
E3	Sample 7	H2O4	USP36	UNKNOWN	SYBR	None				32.5811	32.5803	0.0573198							TRUE	0.227818	TRUE	3	29	1	91.1241	65.5367			N	N	Y
E4	Sample 8	ABA	USP36	UNKNOWN	SYBR	None				33.624	33.8027	0.229381							TRUE	0.227818	TRUE	3	24	1	91.1241				N	N	N
E5	Sample 8	ABA	USP36	UNKNOWN	SYBR	None				33.7228	33.8027	0.229381							TRUE	0.227818	TRUE	3	25	1	91.2958	68.456	80.3052		N	N	Y
E6	Sample 8	ABA	USP36	UNKNOWN	SYBR	None				34.0614	33.8027	0.229381							TRUE	0.227818	TRUE	3	25	1	91.2958	76.3555			N	N	Y
E7	Sample 9	SA	USP36	UNKNOWN	SYBR	None				32.318	32.2992	0.0165058							TRUE	0.227818	TRUE	3	26	1	91.2958				N	N	N
E8	Sample 9	SA	USP36	UNKNOWN	SYBR	None				32.2872	32.2992	0.0165058							TRUE	0.227818	TRUE	3	27	1	91.1241	65.7084			N	N	Y
E9	Sample 9	SA	USP36	UNKNOWN	SYBR	None				32.2924	32.2992	0.0165058							TRUE	0.227818	TRUE	3	27	1	91.1241				N	N	N
E10	Sample 10	GA3	USP36	UNKNOWN	SYBR	None				35.3028	35.0815	0.198943							TRUE	0.227818	TRUE	3	29	1	91.1241	64.8497	86.3157		N	N	Y
E11	Sample 10	GA3	USP36	UNKNOWN	SYBR	None				35.0241	35.0815	0.198943							TRUE	0.227818	TRUE	3	30	1	90.9524	86.6592			N	N	Y
E12	Sample 10	GA3	USP36	UNKNOWN	SYBR	None				34.9175	35.0815	0.198943							TRUE	0.227818	TRUE	3	29	1	90.9524	86.3157			N	N	Y
F1
F2
F3
F4
F5
F6
F7
F8
F9
F10
F11
F12
G1
G2
G3
G4
G5
G6
G7
G8
G9
G10
G11
G12
H1
H2
H3
H4
H5
H6
H7
H8
H9
H10
H11
H12
Analysis Type	Singleplex
Endogenous Control	USP40
RQ Min/Max Confidence Level	95.0
Reference Sample	Sample 1

## Sheet: Calculation
		eEF			USP2			USP3			USP6			USP12			USP14			USP22			USP32			USP33			USP36
	Control	24.5	24.45	24.79	23.7279	23.3702	23.6318	21.6471	21.6592	21.6468	27.3458	26.692	26.6879	22.9862	22.9401	24.8539	26.7437	26.8229	26.782	32.6043	32.3551	32.49	27.96	27.98	27.94	29	28.97	28.95	33.3522	33.027	32.5104
	Salt	23.91	24.03	24.69	21.1217	20.8251	20.9163	19.1929	19.5842	19.7579	25.8548	25.7636	26.3	21.9702	21.8787	21.8181	25.3196	25.5011	25.6548	33.953	34.1325	33.0841	26.27	26.45	26.62	30.42	30.42	30.24	34.81	34.73	33.42
	Drought	25.7	26	26.14	21.9634	22.1439	22.197	21.1998	19.9528	21.0888	28.3943	27.958	28.672	23.9294	23.9694	24.0313	26.0415	26.3361	26.6811	35.1954	36.0176	35.0666	28.17	28.37	28.36	27.8783	27.8296	27.8856	35.13	35.53	35.41
	Cold	25.99	26.3	26.52	26.8753	23.9566	29.8026	23.8744	23.2798	23.3662	26.3457	26.1228	26.1393	25.2957	25.3743	25.6729	25.7987	26.1353	26.931	35.241	35.6092	35.6836	27.72	27.67	27.95	30.1909	30.8959	30.5345	33.17	33.15	32.82
	Heat	27.39	28.43	28.18	22.6758	23.2271	23.3655	20.6592	21.1978	21.4161	29.0664	28.8396	28.514	24.6612	24.2214	24.0285	27.7885	26.3456	26.3747	35.6787	36.1078	36.1269	29.97	30	29.9	26.5558	26.5771	26.4852	37.01	36.85	36.68
	Dehydration	21.96	22.52	22.99	20.4912	19.2241	20.6169	15.2268	15.8747	15.5948	24.9558	25.4625	25.5956	20.4225	20.0824	20.4366	25.5228	25.6798	25.4953	33.5019	33.4056	33.2386	26.4	26.68	26.33	23.8757	23.9534	23.9323	33.72	33.01	33.34
	H2O2	21.49	22.1	22.44	23.2999	23.6727	22.6188	17.027	17.5052	17.9557	27.0804	26.3989	26.796	20.621	20.5363	20.6017	26.5238	26.5768	26.7299	32.4736	33.0671	33.8725	26.98	27.07	25.99	32.5792	32.478	32.4513	32.52	32.64	32.58
	ABA	27.28	26.61	27.57	22.6639	24.6695	22.064	23.0742	23.9433	23.7039	26.1631	26.6008	25.9956	27.6881	27.7134	27.5964	25.5062	25.3314	25.6269	33.3164	32.9896	32.5827	28.56	28.07	26.39	33.8787	32.848	34.4524	33.62	33.72	34.06
	SA	24.88	23.69	25	22.7563	21.1287	21.6028	19.7661	19.8857	19.5328	25.3993	26.3666	25.3589	21.8345	21.9261	21.9004	24.9435	24.9134	24.7807	30.7221	30.5904	30.8078	27.43	27.61	26.27	27.6525	27.7682	27.8593	32.32	32.29	32.29
	GA3	25.99	25.29	25.18	20.4798	21.1614	21.0949	20.2538	20.6252	20.8729	26.3218	26.0201	26.3635	23.005	22.7144	22.8507	24.8016	24.8939	25.0404	34.0754	33.7445	33.2551	28.29	28.22	27.09	27.6951	27.9581	27.9103	35.3	35.02	34.92
	dCT	eEF			USP2			USP3			USP6			USP12			USP14			USP22			USP32			USP33			USP36
	Control	0	0	0	-0.772104	-1.07982	-1.15821	-2.85289	-2.79085	-3.14321	2.84582	2.24196	1.89793	-1.51382	-1.50985	0.0639276	2.2437	2.37289	1.99202	8.10434	7.9051	7.7	3.46	3.53	3.15	4.5	4.52	4.16	8.85216	8.57699	7.72041
	Salt	0	0	0	-2.78829	-3.20486	-3.77374	-4.71708	-4.44581	-4.93209	1.94477	1.73364	1.60996	-1.93979	-2.15134	-2.87186	1.40963	1.47107	0.964781	10.043	10.1025	8.39407	2.36	2.42	1.93	6.51	6.39	5.55	10.9	10.7	8.73
	Drought	0	0	0	-3.73661	-3.85606	-3.94296	-4.50022	-6.04723	-5.05122	2.69428	1.95801	2.532	-1.7706	-2.03059	-2.10873	0.341479	0.336088	0.541095	9.49545	10.0176	8.92662	2.47	2.37	2.22	2.17833	1.82964	1.74561	9.43	9.53	9.27
	Cold	0	0	0	0.885286	-2.34343	3.28257	-2.11564	-3.02021	-3.15376	0.35572	-0.177203	-0.380662	-0.694287	-0.925736	-0.847051	-0.191338	-0.164687	0.410979	9.25097	9.30921	9.16359	1.73	1.37	1.43	4.2009	4.59591	4.01447	7.18	6.85	6.3
	Heat	0	0	0	-4.71419	-5.20292	-4.81446	-6.73082	-7.23216	-6.76386	1.67644	0.409569	0.334023	-2.72882	-4.20859	-4.15155	0.398492	-2.08444	-1.80534	8.28874	7.67776	7.94688	2.58	1.57	1.72	-0.834183	-1.85288	-1.69478	9.62	8.42	8.5
	Dehydration	0	0	0	-1.4688	-3.29589	-2.37311	-6.73318	-6.64525	-7.39519	2.99582	2.94253	2.60556	-1.53749	-2.43757	-2.5534	3.56285	3.15976	2.50533	11.5419	10.8856	10.2486	4.44	4.16	3.34	1.91574	1.43344	0.942253	11.76	10.49	10.35
	H2O2	0	0	0	1.8099	1.57273	0.178778	-4.46303	-4.59478	-4.48434	5.59035	4.29888	4.356	-0.869032	-1.56372	-1.83826	5.0338	4.47675	4.28994	10.9836	10.9671	11.4325	5.49	4.97	3.55	11.0892	10.378	10.0113	11.03	10.54	10.14
	ABA	0	0	0	-4.61612	-1.94052	-5.50599	-4.20576	-2.66674	-3.86612	-1.11686	-0.00915276	-1.57443	0.408099	1.10341	0.0264184	-1.77381	-1.27856	-1.94306	6.03645	6.37962	5.0127	1.28	1.46	-1.18	6.5987	6.23799	6.88245	6.34	7.11	6.49
	SA	0	0	0	-2.12366	-2.56128	-3.39724	-5.11391	-3.8043	-5.4672	0.519349	2.67656	0.358887	-3.04551	-1.76388	-3.09957	0.0635368	1.22336	-0.219278	5.8421	6.90039	5.80782	2.55	3.92	1.27	2.77247	4.07818	2.85929	7.44	8.6	7.29
	GA3	0	0	0	-5.51024	-4.12858	-4.08508	-5.73621	-4.66481	-4.30709	0.331827	0.730132	1.1835	-2.98498	-2.57557	-2.32929	-1.1884	-0.396089	-0.139599	8.08545	8.45447	8.07509	2.3	2.93	1.91	1.70511	2.66807	2.73028	9.31	9.73	9.74
				Average	-1.00338			-2.92898			2.32857			-0.986583			2.20287			7.90315			3.38			4.39333			8.38318
	ddCT	eEF			USP2			USP3			USP6			USP12			USP14			USP22			USP32			USP33			USP36
	Control				0.231274	-0.0764451	-0.154829	0.0760914	0.138133	-0.214224	0.517255	-0.0866131	-0.430641	-0.52724	-0.52327	1.05051	0.0408281	0.170023	-0.210851	0.201195	0.00195072	-0.203146	0.08	0.15	-0.23	0.106667	0.126667	-0.233333	0.472157	0.19699	-0.659593
	Salt				-1.78491	-2.20149	-2.77036	-1.7881	-1.51683	-2.00311	-0.383798	-0.594931	-0.718613	-0.953208	-1.16476	-1.88527	-0.79324	-0.731796	-1.23809	2.13988	2.19931	0.490922	-1.02	-0.96	-1.45	2.11667	1.99667	1.15667	2.52	2.32	0.35
	Drought				-2.73323	-2.85268	-2.93958	-1.57124	-3.11825	-2.12224	0.365707	-0.370555	0.203428	-0.784018	-1.04401	-1.12215	-1.86139	-1.86678	-1.66177	1.5923	2.11445	1.02348	-0.91	-1.01	-1.16	-2.215	-2.56369	-2.64772	1.05	1.15	0.89
	Cold				1.88866	-1.34005	4.28595	0.813341	-0.0912239	-0.224783	-1.97285	-2.50577	-2.70923	0.292296	0.0608463	0.139531	-2.39421	-2.36756	-1.79189	1.34782	1.40607	1.26045	-1.65	-2.01	-1.95	-0.192428	0.202575	-0.378861	-1.2	-1.53	-2.08
	Heat				-3.71081	-4.19954	-3.81108	-3.80184	-4.30318	-3.83488	-0.652126	-1.919	-1.99455	-1.74224	-3.22201	-3.16497	-1.80438	-4.28731	-4.00821	0.385595	-0.225385	0.0437307	-0.8	-1.81	-1.66	-5.22752	-6.24622	-6.08811	1.24	0.04	0.12
	Dehydration				-0.465424	-2.29251	-1.36973	-3.8042	-3.71627	-4.46621	0.667253	0.613963	0.276995	-0.550909	-1.45099	-1.56682	1.35998	0.956886	0.302455	3.63873	2.98242	2.34545	1.06	0.78	-0.04	-2.47759	-2.9599	-3.45108	3.38	2.11	1.97
	H2O2				2.81328	2.57611	1.18216	-1.53405	-1.6658	-1.55536	3.26178	1.97032	2.02743	0.11755	-0.577136	-0.85168	2.83093	2.27388	2.08707	3.08047	3.06395	3.5294	2.11	1.59	0.17	6.69582	5.98467	5.61799	2.65	2.16	1.76
	ABA				-3.61275	-0.937142	-4.50261	-1.27678	0.262242	-0.937136	-3.44543	-2.33772	-3.90299	1.39468	2.08999	1.013	-3.97668	-3.48143	-4.14593	-1.8667	-1.52353	-2.89045	-2.1	-1.92	-4.56	2.20537	1.84466	2.48912	-2.04	-1.27	-1.89
	SA				-1.12028	-1.55791	-2.39386	-2.18493	-0.87532	-2.53821	-1.80922	0.347991	-1.96968	-2.05893	-0.777295	-2.11298	-2.13933	-0.979509	-2.42215	-2.06105	-1.00276	-2.09533	-0.83	0.54	-2.11	-1.62086	-0.315148	-1.53404	-0.94	0.22	-1.09
	GA3				-4.50686	-3.1252	-3.0817	-2.80723	-1.73582	-1.37811	-1.99674	-1.59844	-1.14507	-1.9984	-1.58899	-1.34271	-3.39127	-2.59896	-2.34247	0.182301	0.551323	0.171943	-1.08	-0.45	-1.47	-2.68822	-1.72527	-1.66305	0.93	1.35	1.36
	2^-ddCT	eEF			USP2			USP3			USP6			USP12			USP14			USP22			USP32			USP33			USP36
	Control				0.851882	1.05442	1.11329	0.948624	0.908694	1.16008	0.6987	1.06187	1.34783	1.44117	1.43721	0.482797	0.972097	0.888828	1.15737	0.86983	0.998649	1.15121	0.946058	0.90125	1.17283	0.928731	0.915945	1.17555	0.720886	0.872369	1.57964
	Salt				3.44597	4.59953	6.82278	3.45359	2.86162	4.00864	1.30477	1.5104	1.6456	1.93617	2.24196	3.69423	1.73296	1.66071	2.35886	0.226899	0.217742	0.71157	2.02792	1.94531	2.73208	0.230579	0.250578	0.448548	0.174343	0.200267	0.784584
	Drought				6.64942	7.22342	7.67186	2.97161	8.68332	4.3537	0.776088	1.29285	0.868484	1.72192	2.06195	2.17671	3.63358	3.64718	3.16406	0.331642	0.230934	0.491929	1.87905	2.01391	2.23457	4.64282	5.91218	6.26676	0.482968	0.450625	0.539614
	Cold				0.270057	2.5316	0.0512626	0.569063	1.06527	1.1686	3.92542	5.67953	6.53973	0.816601	0.958702	0.907814	5.25688	5.16066	3.46269	0.392884	0.377339	0.417414	3.13834	4.02782	3.86375	1.14269	0.868998	1.30032	2.2974	2.88786	4.22807
	Heat				13.0938	18.3733	14.0362	13.9466	19.7418	14.2697	1.57148	3.78161	3.98491	3.34554	9.33088	8.96911	3.49278	19.5258	16.0913	0.765463	1.16909	0.970143	1.7411	3.50642	3.16017	37.4662	75.9098	68.0305	0.423373	0.972655	0.920188
	Dehydration				1.38072	4.89908	2.58422	13.9694	13.1435	22.1036	0.629704	0.653399	0.825308	1.46501	2.73395	2.96251	0.389589	0.515168	0.810871	0.0802845	0.126532	0.196766	0.479632	0.582367	1.02811	5.56967	7.78068	10.9365	0.0960547	0.231647	0.255253
	H2O2				0.142272	0.167693	0.440692	2.89598	3.1729	2.93906	0.104257	0.255197	0.245291	0.921751	1.49188	1.8046	0.140542	0.206773	0.235359	0.118219	0.11958	0.0866053	0.231647	0.332171	0.888843	0.00964624	0.0157919	0.0203618	0.15932	0.223756	0.295248
	ABA				12.2333	1.91473	22.6685	2.42297	0.833791	1.91472	10.8937	5.05504	14.9595	0.380329	0.234882	0.495514	15.7434	11.169	17.7031	3.64697	2.87493	7.41501	4.28709	3.78423	23.5883	0.216829	0.278422	0.178115	4.11246	2.41162	3.70635
	SA				2.17389	2.94426	5.25562	4.54705	1.83442	5.8087	3.50453	0.785677	3.91682	4.16676	1.71391	4.32585	4.40558	1.97179	5.35969	4.1729	2.00383	4.27324	1.77769	0.687771	4.31691	3.07558	1.24414	2.89596	1.91853	0.858565	2.12874
	GA3				22.7352	8.72527	8.46609	6.99941	3.3307	2.59927	3.99098	3.02815	2.21156	3.99557	3.00839	2.53627	10.4924	6.05849	5.0717	0.881296	0.682394	0.887647	2.11404	1.36604	2.77022	6.4452	3.30641	3.16686	0.524858	0.392292	0.389582
	log (2^-ddCT)				USP2			USP3			USP6			USP12			USP14			USP22			USP32			USP33			USP36
	Control				-0.231274	0.0764451	0.154829	-0.0760914	-0.138133	0.214224	-0.517255	0.0866131	0.430641	0.52724	0.52327	-1.05051	-0.0408281	-0.170023	0.210851	-0.201195	-0.00195072	0.203146	-0.08	-0.15	0.23	-0.106667	-0.126667	0.233333	-0.472157	-0.19699	0.659593
	Salt				1.78491	2.20149	2.77036	1.7881	1.51683	2.00311	0.383798	0.594931	0.718613	0.953208	1.16476	1.88527	0.79324	0.731796	1.23809	-2.13988	-2.19931	-0.490922	1.02	0.96	1.45	-2.11667	-1.99667	-1.15667	-2.52	-2.32	-0.35
	Drought				2.73323	2.85268	2.93958	1.57124	3.11825	2.12224	-0.365707	0.370555	-0.203428	0.784018	1.04401	1.12215	1.86139	1.86678	1.66177	-1.5923	-2.11445	-1.02348	0.91	1.01	1.16	2.215	2.56369	2.64772	-1.05	-1.15	-0.89
	Cold				-1.88866	1.34005	-4.28595	-0.813341	0.0912239	0.224783	1.97285	2.50577	2.70923	-0.292296	-0.0608463	-0.139531	2.39421	2.36756	1.79189	-1.34782	-1.40607	-1.26045	1.65	2.01	1.95	0.192428	-0.202575	0.378861	1.2	1.53	2.08
	Heat				3.71081	4.19954	3.81108	3.80184	4.30318	3.83488	0.652126	1.919	1.99455	1.74224	3.22201	3.16497	1.80438	4.28731	4.00821	-0.385595	0.225385	-0.0437307	0.8	1.81	1.66	5.22752	6.24622	6.08811	-1.24	-0.04	-0.12
	Dehydration				0.465424	2.29251	1.36973	3.8042	3.71627	4.46621	-0.667253	-0.613963	-0.276995	0.550909	1.45099	1.56682	-1.35998	-0.956886	-0.302455	-3.63873	-2.98242	-2.34545	-1.06	-0.78	0.04	2.47759	2.9599	3.45108	-3.38	-2.11	-1.97
	H2O2				-2.81328	-2.57611	-1.18216	1.53405	1.6658	1.55536	-3.26178	-1.97032	-2.02743	-0.11755	0.577136	0.85168	-2.83093	-2.27388	-2.08707	-3.08047	-3.06395	-3.5294	-2.11	-1.59	-0.17	-6.69582	-5.98467	-5.61799	-2.65	-2.16	-1.76
	ABA				3.61275	0.937142	4.50261	1.27678	-0.262242	0.937136	3.44543	2.33772	3.90299	-1.39468	-2.08999	-1.013	3.97668	3.48143	4.14593	1.8667	1.52353	2.89045	2.1	1.92	4.56	-2.20537	-1.84466	-2.48912	2.04	1.27	1.89
	SA				1.12028	1.55791	2.39386	2.18493	0.87532	2.53821	1.80922	-0.347991	1.96968	2.05893	0.777295	2.11298	2.13933	0.979509	2.42215	2.06105	1.00276	2.09533	0.83	-0.54	2.11	1.62086	0.315148	1.53404	0.94	-0.22	1.09
	GA3				4.50686	3.1252	3.0817	2.80723	1.73582	1.37811	1.99674	1.59844	1.14507	1.9984	1.58899	1.34271	3.39127	2.59896	2.34247	-0.182301	-0.551323	-0.171943	1.08	0.45	1.47	2.68822	1.72527	1.66305	-0.93	-1.35	-1.36
		USP2	USP3	USP6	USP12	USP14	USP22	USP32	USP33	USP36		SD	USP2	USP3	USP6	USP12	USP14	USP22	USP32	USP33	USP36		t-test	USP2	USP3	USP6	USP12	USP14	USP22	USP32	USP33	USP36
	Control	2.65056e-08	1.22518e-08	-1.54601e-10	1.4445e-08	2.52279e-08	-7.99154e-09	-1.45254e-15	-3.33333e-07	-0.00318443		Control	0.204088	0.188099	-1.54601e-10	0.909771	0.193692	0.202178	0.202237	0.20232	0.590241
	Salt	2.25225	1.76935	0.565781	1.33441	0.921042	-1.61004	1.14333	-1.75667	-1.73		Salt	0.494682	0.243683	0.565781	0.488644	0.276284	0.969637	0.26727	0.523068	1.19929		Salt	0.00663216	0.00986004	0.0197399	0.00119362	0.0345316	0.106451	0.0874545	0.078297	0.0481252
	Drought	2.84183	2.27058	-0.0661934	0.983393	1.79665	-1.57674	1.02667	2.47547	-1.03		Drought	0.103601	0.784097	-0.0661934	0.177029	0.116836	0.545651	0.125831	0.229452	0.131149		Drought	0.000466277	0.0238334	0.0330135	0.0449934	0.187458	0.300753	0.838766	0.928106	0.90367
	Cold	-1.61152	-0.165778	2.39595	-0.164225	2.18455	-1.33811	1.87	0.122905	1.60333		Cold	2.82322	0.564768	2.39595	0.117684	0.340315	0.0732946	0.192873	0.296888	0.44456		Cold	0.431001	0.516635	0.366128	0.628146	0.369697	0.181837	0.000672217	0.31289	0.797207
	Heat	3.90715	3.97997	1.52189	2.70974	3.36663	-0.0679805	1.42333	5.85395	-0.466667		Heat	0.258135	0.280398	1.52189	0.838364	1.36013	0.306211	0.545008	0.548234	0.67092		Heat	0.00120749	0.00120166	0.00340916	0.00368694	0.0886616	0.0946239	0.0156318	0.00173264	0.0552368
	Dehydration	1.37589	3.99556	-0.519404	1.18957	-0.873106	-2.98887	-0.6	2.96286	-2.48667		Dehydration	0.91356	0.409957	-0.519404	0.556121	0.533715	0.646667	0.571664	0.48675	0.77681		Dehydration	0.090941	0.0884455	0.0777397	0.00103157	0.199847	0.544564	0.106623	0.314445	0.879414
	H2O2	-2.19052	1.58507	-2.41984	0.437088	-2.39729	-3.22461	-1.29	-6.09949	-2.19		H2O2	0.881279	0.070722	-2.41984	0.499561	0.386984	0.264088	1.00419	0.548011	0.445758		H2O2	0.0360009	0.593419	0.565979	0.00709054	0.934815	0.457507	0.00672248	0.105389	0.307445
	ABA	3.0175	0.650558	3.22871	-1.49923	3.86801	2.09356	2.86	-2.17971	1.73333		ABA	1.85577	0.808543	3.22871	0.546055	0.34532	0.711139	1.47499	0.322996	0.408207		ABA	0.109161	0.182527	0.293183	0.267797	0.346507	0.13209	0.0239527	0.504958	0.870866
	SA	1.69068	1.86615	1.14364	1.64974	1.847	1.71971	0.8	1.15668	0.603333		SA	0.64709	0.876081	1.14364	0.756039	0.764459	0.621136	1.32525	0.730082	0.716961		SA	0.0257599	0.0161215	0.0468093	0.0485171	0.0496769	0.266189	0.298352	0.380822	0.12195
	GA3	3.57125	1.97372	1.58008	1.64337	2.77757	-0.301855	1	2.02551	-1.21333		GA3	0.81055	0.743671	1.58008	0.331212	0.546736	0.216107	0.514684	0.574767	0.245425		GA3	0.0257568	0.000280971	0.0175577	0.0583479	0.0416402	0.0506132	0.0935718	0.0206197	0.038371
USP2	Mean	SD		USP3	Mean	SD		USP6	Mean	SD		USP12	Mean	SD		USP14	Mean	SD		USP22	Mean	SD		USP32	Mean	SD		USP33	Mean	SD		USP36	Mean	SD
Salt	2.25225	0.494682		Salt	1.76935	0.243683		Salt	0.565781	0.565781		Salt	1.33441	0.488644		Salt	0.921042	0.276284		Salt	-1.61004	0.969637		Salt	1.14333	0.26727		Salt	-1.75667	0.523068		Salt	-1.73	0.199291
Drought	2.84183	0.103601		Drought	2.27058	0.784097		Drought	-0.0661934	-0.0661934		Drought	0.983393	0.177029		Drought	1.79665	0.116836		Drought	-1.57674	0.545651		Drought	1.02667	0.125831		Drought	2.47547	0.229452		Drought	-1.03	0.131149
Cold	-1.61152	0.82		Cold	-0.165778	0.564768		Cold	2.39595	0.39595		Cold	-0.164225	0.117684		Cold	2.18455	0.340315		Cold	-1.33811	0.0732946		Cold	1.87	0.192873		Cold	0.122905	0.296888		Cold	1.60333	0.44456
Heat	3.90715	0.258135		Heat	3.97997	0.280398		Heat	1.52189	1.52189		Heat	2.70974	0.838364		Heat	3.36663	1.36013		Heat	-0.0679805	0.306211		Heat	1.42333	0.545008		Heat	5.85395	0.548234		Heat	-0.466667	0.67092
Dehydration	1.37589	0.91356		Dehydration	3.99556	0.409957		Dehydration	-0.519404	-0.519404		Dehydration	1.18957	0.556121		Dehydration	-0.873106	0.533715		Dehydration	-2.98887	0.646667		Dehydration	-0.6	0.571664		Dehydration	2.96286	0.48675		Dehydration	-2.48667	0.77681
H2O2	-2.19052	0.881279		H2O2	1.58507	0.070722		H2O2	-2.41984	0.419844		H2O2	0.437088	0.499561		H2O2	-2.39729	0.386984		H2O2	-3.22461	0.264088		H2O2	-1.29	1.00419		H2O2	-6.09949	0.548011		H2O2	-2.19	0.445758
ABA	3.0175	1.85577		ABA	0.650558	0.808543		ABA	3.22871	1.22871		ABA	-1.49923	0.546055		ABA	3.86801	0.34532		ABA	2.09356	0.711139		ABA	2.86	0.474992		ABA	-2.17971	0.322996		ABA	1.73333	0.408207
SA	1.69068	0.64709		SA	1.86615	0.876081		SA	1.14364	1.14364		SA	1.64974	0.756039		SA	1.847	0.764459		SA	1.71971	0.621136		SA	0.8	1.32525		SA	1.15668	0.730082		SA	0.603333	0.316961
GA3	3.57125	0.81055		GA3	1.97372	0.743671		GA3	1.58008	1.58008		GA3	1.64337	0.331212		GA3	2.77757	0.546736		GA3	-0.301855	0.216107		GA3	1	0.514684		GA3	2.02551	0.574767		GA3	-1.21333	0.245425
